# Supplementary material
Source: PubMed Central journal article supplement (PMC3785769)
Supplement: 1303236110_sapp.pdf [file 1303236110_sapp.pdf]

# Supplementary Material

## Reconstructing dynamic microRNA regulated interaction networks

---

### Table of Contents

|                                                                                           |           |
|-------------------------------------------------------------------------------------------|-----------|
| <b>Appendix I – Supplemental Methods</b> .....                                            | <b>2</b>  |
| Computational Methods for mirDREM .....                                                   | 2         |
| <i>Description of the underlying probabilistic model</i> .....                            | 2         |
| <i>Logistic regression classification in DREM</i> .....                                   | 3         |
| <i>Incorporating miRNA expression levels</i> .....                                        | 4         |
| <i>A constraint based approach to lasso logistic regression in mirDREM</i> .....          | 5         |
| <i>Likelihood function</i> .....                                                          | 6         |
| <i>Model Learning</i> .....                                                               | 7         |
| <i>Enrichment Computation for miRNAs at split nodes</i> .....                             | 7         |
| Rational for experimental time series design .....                                        | 8         |
| Obtaining TF and miRNA gene predictions .....                                             | 8         |
| Obtaining validated miRNA-gene interactions .....                                         | 8         |
| Immunoblotting .....                                                                      | 9         |
| <b>Appendix II - Supplementary Results</b> .....                                          | <b>9</b>  |
| Gene ontology path enrichment of mirDREM paths .....                                      | 9         |
| Overlap with validated miRNA-gene interactions .....                                      | 11        |
| GO analysis of top-300 ranked genes by different methods .....                            | 12        |
| Robustness analysis of mirDREM .....                                                      | 14        |
| <i>Parameter robustness</i> .....                                                         | 14        |
| RT-qPCR of selected miRNAs in lung epithelial cells .....                                 | 15        |
| Validation of mirDREM paths by miRNA transfection .....                                   | 16        |
| Validation of individual miRNA-gene targets by transfection and immunoblotting .....      | 17        |
| Analysis of significant miRNAs in patients with Idiopathic Pulmonary Fibrosis (IPF) ..... | 18        |
| Using TargetScan predictions for network construction .....                               | 18        |
| References .....                                                                          | 21        |
| <b>Appendix III – Supplemental Datasets</b> .....                                         | <b>22</b> |

## Appendix I – Supplemental Methods

### Computational Methods for mirDREM

We introduce a new algorithm to learn a dynamic map of TF and miRNA regulation that jointly considers protein-DNA as well as miRNA-gene regulatory relationships and time series expression data of the regulated genes and the miRNA regulators. The method addresses the fact that miRNAs prevent mRNA translation by primarily acting at the transcriptional level. The next figure illustrates the different data sources that are used.

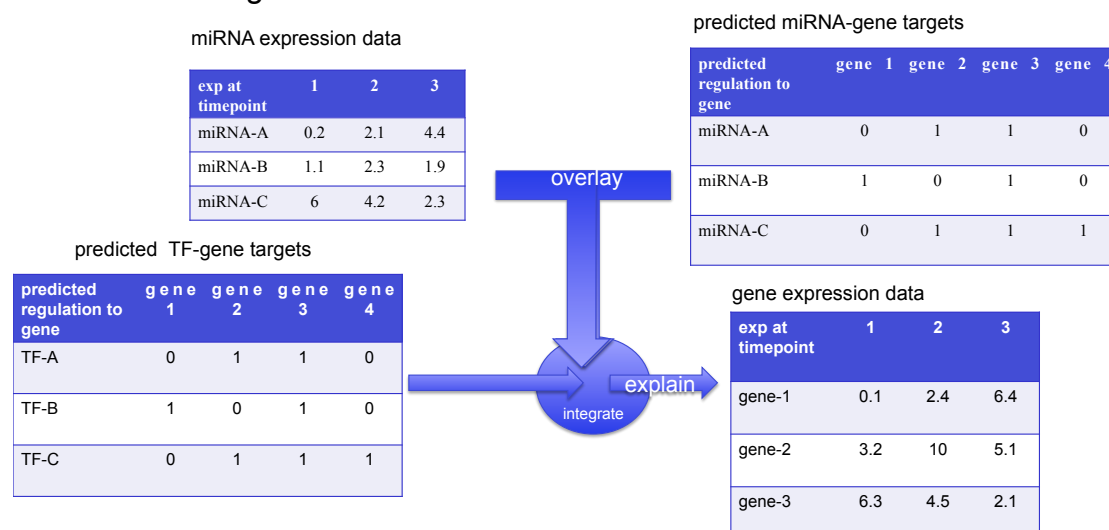

mirDREM utilizes 4 different data sources. Gene and miRNA expression data sets that measure genome wide expression for each time point part of the investigated process. Further, predicted or experimentally acquired TF-gene and miRNA-gene regulatory relationships are an essential part of mirDREM.

### Description of the underlying probabilistic model

mirDREM integrates several different data sources to model the joint effect of TF and miRNA regulation on gene expression measured as a time series. Following Ernst et al.<sup>1</sup> we construct an Input-Output Hidden Markov Model (IOHMM) denoted  $M$ .  $M$  is a tuple  $(H, E, \psi, \Theta, n, \gamma)$ .  $H$  denotes the set of hidden states, the nodes in the model, and each hidden state  $h$  is associated with an output distribution of Gaussian form.  $\Theta$  denotes a set of parameters for the output distributions of the hidden states  $h$ .  $\Theta_h$  is a tuple  $(\mu_h, \sigma_h)$  of the mean and standard variation of the Gaussian distribution associated to  $h$ .  $n$  denotes the number of time points of the model.  $E$  is the set of directed edges that

connect the states in  $H$  and are enforced to form a tree where each node has at most  $\gamma$  children. If a state  $h$  has more than one outgoing edge, it is denoted a *split node*.  $\psi$  is a set of transition parameters between hidden states,  $\psi_h$  for each  $h$ .  $\psi_h$  has the form of a logistic regression coefficient vector whenever edge  $e$  emerges out of a split node.

DREM learns the transition parameters of the IOHMM by solving a logistic regression problem. For each hidden state  $h$ , that has more than one child,  $h$  maps an input vector  $X^g$ , for each gene  $g$ , to transition probabilities to the child node of  $h$ . The input vector  $X^g$  is different for each time point  $t$  in mirDREM, therefore denoted  $X^{g,t}$ , and consists of  $T$  and  $R$  input values for TFs and miRNAs, as explained below. This is one of the two major differences between mirDREM and the original version of DREM (the other difference is the requirement for anti-correlation, also below). In DREM  $X^g$  is static and contained only TF input values. In mirDREM  $X^{g,t}$  is time point specific.

### Logistic regression classification in DREM

DREM<sup>1</sup> uses a  $L_1$ -logistic regression classifier which maps a gene feature vector  $X=\{X_1, \dots, X_T\}$  to a class label  $Y=\{0,1\}$ , for  $T$  transcription factors for a binary classification problem. The groups 0 or 1 denote one of the outgoing edges of a binary split node.  $L_1$  – regularized logistic regression, often called lasso regression, promotes sparsity by penalizing features that contribute little to the solution. For the sake of simpler notation we omit the  $h$  in  $\psi_h$  as we are solving one classification problem at a time, one for each state.

In a logistic regression classification framework the probability that a feature vector belongs to class 1 is defined as:

$$P(Y = 1|X) = \frac{1}{1 + \exp(-\psi_0 - \sum_i X_i \psi_i)} .$$

In order to solve for the best weight vector  $\hat{\psi} = \{\psi_0, \psi_1, \dots, \psi_T\}$ , a  $L_1$ -logistic regression classifier optimizes the penalized conditional log-likelihood of  $n$  training examples  $\{(X^j, Y^j)\}_{j=1}^n$  as :

$$\hat{\psi} = \arg \max_{\psi} L(\psi) = \arg \max_{\psi} [l(\psi) + \log p(\psi)] \quad (1)$$

, where  $\log p(\psi)$  is the  $L_1$  - regularization term and

$$l(\psi) = \sum_{j=1}^n \log P(Y^j | X^j, \psi_j) \quad (2)$$

denotes the conditional log-likelihood for logistic regression<sup>2</sup>.

The conditional log-likelihood function is convex and can be optimized to obtain a global solution to equation (1).

In DREM the feature vector  $X^g$  for gene  $g$  is defined as an indicator vector, where  $X_i^g = 1$  if gene  $g$  is bound by transcription factor  $i$  and 0 otherwise.

## Incorporating miRNA expression levels

While we can obtain expression levels for miRNAs, we cannot obtain direct information about their specific temporal regulation of target mRNAs. Thus, our aim is to integrate the temporal expression data with the static sequence based prediction data to obtain a prior on the effect a specific miRNA has on a specific mRNA at time point  $t$ . We are particularly interested in finding miRNA regulators that change their expression behavior during the time course and whose targets are changing in response to this change, see Supplementary Figure S1.

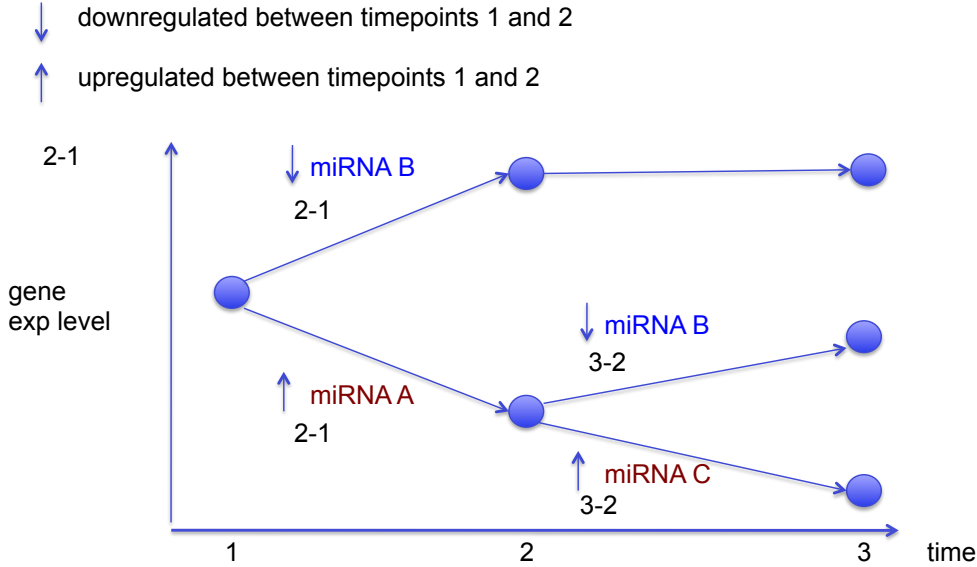

Supplementary Figure S1 – Illustrates the relationship of miRNA regulators on genes at split nodes learnt by miRDREM. The figure depicts three hypothetical time points with a model that has two split nodes, where each arrow represents a set of genes that are assigned to this path. Three miRNAs are shown that support an anti correlated expression behavior to the majority of genes assigned to the emerging paths out of the split node. If a miRNA is overexpressed (denoted in blue), the predicted target genes should be found in a path that leads to a node that has a higher expression level than the split node from which it emerges. Vice versa, if a miRNA is underexpressed (in red) its target genes should show a lower expression level compared to the split node.

We define  $o_r^t$  as the gene expression log odds ratio for a miRNA  $r$  at time point  $t$  :

$$o_r^t = \log \frac{xp_r^t}{xp_r^{t-1}}$$

, where  $xp_r^t$  denotes the expression level of miRNA  $r$  at time point  $t$ .  $o_r^t$  captures the change in expression for two consecutive time points.

The key idea is that miRNAs that change their expression level change their *regulatory effect* on target genes. For example, a miRNA  $r$  with increase in expression has a higher copy number in the cell and may affect an increased number of its potential targets. On the other hand, the strength of the regulatory effect for miRNA  $r$  on a target gene  $g$  depends on the binding strength denoted  $b_g^r$ , where  $b_g^r > 0$ . Therefore, our formalism can model both aspects and the gene expression odds ratio  $o_r^t$  and the binding strength  $b_g^r$  are incorporated into the definition of a regulatory effect  $RE_g^{r,t}$ :

$$RE_g^{r,t} = \text{sign}(o_r^t) \begin{cases} \left( \frac{2}{1 + \exp(|o_r^t| b_g^r \phi)} \right), & |o_r^t| \geq d \\ 0, & \text{else} \end{cases}$$

,where  $\phi$  denotes a scaling weight for combining binding strength and expression odds ratio using a logistic function. If the absolute expression odds ratio is below a minimal change threshold  $d$ , the regulatory effect is 0 for time point  $t$ . The regulatory effect can be positive or negative and therefore the sign of the change in expression,  $\text{sign}(o_r^t)$ , is included.

This will be important to learn a pattern of anti-correlation at a split node as explained in Supplementary Figure S1.

In our current implementation, the computed  $RE_g^{r,t}$  values are rounded to integers and  $d$  is set to 0.25.

### A constraint based approach to lasso logistic regression in mirDREM

In order to include TF and miRNA variables into the logistic regression classification framework in mirDREM, the feature vector  $X$  is changed in two ways, it is made time point specific and includes  $T$  features for TFs and  $R$  features for miRNAs, denoted as  $X^{g,t} = \{X_1, \dots, X_T, RE_g^{1,t}, \dots, RE_g^{R,t}\}$ . Therefore,  $X^{g,t}$  contains a set of static features for the TFs and a set of time point specific features for miRNAs, where the latter captures the regulatory effect of each miRNA  $r$  on a target gene  $g$  based on its change in expression at time point  $t$ , see above. The vector of regression weights is changed accordingly

$$\psi = \{\psi_0, \psi_1, \dots, \psi_T, \psi_{T+1}, \dots, \psi_{T+R}\}.$$

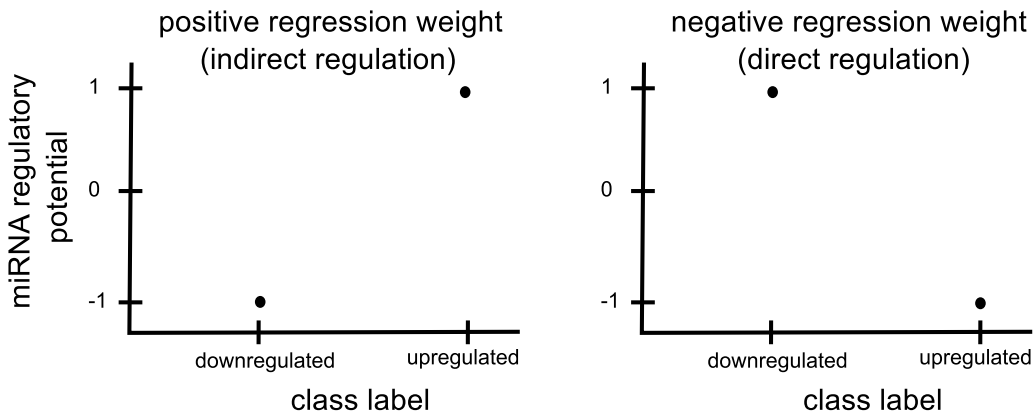

Supplementary Figure S2: The graphs illustrate the importance of constraining the logistic regression weights to ensure that a regulatory pattern of anti correlation is learnt for miRNA targets by the classifier. (left) If the miRNA shows a positive regulatory effect and its target genes are up regulated the classifier will learn a positive weight, similarly with down regulated targets and a negative regulatory effect. (right) The ideal scenario is if the miRNA shows negative regulatory effect when its targets are up regulated and *vice versa*.

Because we expect that direct regulation by a miRNA leads to inhibition effects of the target gene, we introduce additional constraints for weight values that correspond to miRNA feature values in  $X^{g,t}$ . We seek to optimize the following equation:

$$\hat{\psi} = \arg \max_{\psi} L(\psi) \quad (3)$$

$$s. t. \quad \psi_x \leq 0, \forall x > T$$

In other words, we only allow for negative regression coefficients for miRNAs, as opposed to TFs that can be either activators or repressors, see Supplementary Figure S2 for explanation. Such a formulation is known as *constrained logistic regression*<sup>3</sup> and in our particular instance *constrained lasso logistic regression*. The reader should not be confused, because the  $L_1$  – regularization term itself is sometimes termed a constraint to logistic regression. However, here the objective function is penalized with the  $L_1$ -norm to promote sparsity and in addition some of the weight terms are constrained as well.

To solve Equation (3) we use a modified version of the approach described by Krishnapuram et al. for lasso logistic regression. In<sup>2</sup> they introduce an efficient iterative method that optimizes one entry in the weight vector  $\psi$  at a time. Such an iterative assignment allows us to introduce the non-positivity constraints, because each weight can be forced at its round of optimization to remain smaller than, or equal to, zero. For the unconstrained *TF* variables,  $\psi_1, \dots, \psi_T$ , the optimization is not modified. This procedure guarantees that our learning method still converges to a global optimum. Note that our constrained optimization problem has only added linear constraints ( $\leq 0$ ) to a convex problem, which means that the convexity of the problem still holds<sup>4</sup>.

### Likelihood function

Let  $o_g = (o_g(1), \dots, o_g(n-1))$  be the log ratio expression values for gene  $g$  at time points 1 to  $n-1$  relative to a time point 0 control. Define  $h_t$  as the hidden state variable at time  $t$ , where  $t \in \{0, 1, \dots, n-1\}$ . Denote the transition probability for a gene  $g$  to transition to state  $h_b$  at time point  $t$  given that it is in hidden state  $h_a$  at time point  $t$  as  $P(H_t = h_b | H_{t-1} = h_a, X^{g,t})$ . This probability is 0 if  $h_b$  is not a child of  $h_a$  and set to 1 if it is the only child of  $h_a$ . If  $h_a$  has two children then the transitions are probabilistic and depend on the input vector  $X^{g,t}$ . The mapping from input vector  $X^{g,t}$  to transition probabilities for a hidden state  $h_a$  are determined by a trained logistic regression classifier see above. The likelihood density,  $r$ , for a set of genes  $G$  in IOHMM model  $M$  is

$$r(G|M) = \sum_{g \in G} \log \sum_{q \in Q} \prod_{t=1}^{n-1} f_{q(t)}(o_g(t)) \prod_{t=1}^{n-1} P(H_t = q(t) | H_{t-1} = q(t-1), X^{g,t})$$

where  $Q$  is the set of all possible paths of hidden states of length  $n$  starting from the root node with non-zero probability.

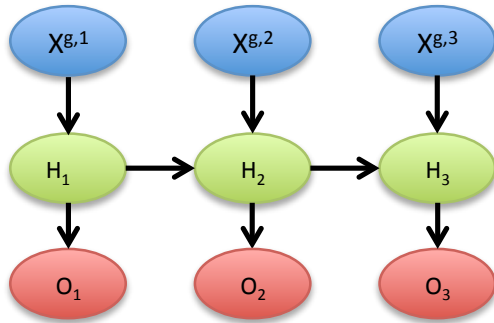

Depiction of an example IOHMM

## Model Learning

The parameters of the model are learnt using the Baum-Welch EM algorithm for a fixed tree structure. During each maximization step of Baum-Welch the logistic regression classifiers are retrained. When training a classifier, for every gene in the training set the classifier is given a weighted example of the gene transition to each child state. The weight of the example is the probability of that gene going through that hidden state based on the current values of all the parameters in the model.

The structure of the network is learned in a greedy fashion. Starting from a linear model with one hidden state per time point, the algorithm explores additions of new hidden states at each time point. The algorithm uses the BIC penalty to the model likelihood to decide if the best hidden state addition is executed and the model structure is changed, in each round of structure learning. A new state is added if the penalized likelihood is larger than in the unchanged model (default penalty 40). After no new addition is made at the end of a structure learning round, it is tested if splits can be delayed or paths merged to simplify the model<sup>1</sup>. After structure learning all genes are parsed through the model and assigned to paths in the model using the Viterbi algorithm.

## Enrichment Computation for miRNAs at split nodes

DREM uses the Hypergeometric statistic to assign a transcription factor  $f$  to an edge  $e$  in the model<sup>1</sup>, denoted  $H_e^f$ .

In addition to thresholding the hypergeometric enrichment score  $H_e^r$  for miRNA  $r$  used in DREM for an edge  $e$  emanating a split node, we make use of the gene expression odds ratio  $o_r^t$  for a miRNA to define a secondary filter. Only if the absolute value of the expression ratio  $o_r^t$  is greater than threshold  $T$ , as defined above, and if the direction of the edge, termed  $dir(e)$ , is opposite to the sign of the expression change:

$$score(e, t, r) = \begin{cases} H_e^r, & |o_r^t| > d \wedge sign(o_r^t) \neq dir(e) \\ 1, & otherwise \end{cases}$$

As default we consider a miRNA  $r$  on edge  $e$  if  $score(e, t, r) \leq 0.05$ .

## Rational for experimental time series design

At birth (P0), mice have lungs in the saccular stage of lung development which corresponds to that seen in extremely premature human infants (24-28 weeks of gestation). On the fourth postnatal day (P4), alveolar septation begins with development and elongation of secondary crests that divide the primary saccules into alveoli. Rapid alveolar septation occurs between postnatal days 7 and 14 (P7-P14), and the majority of alveolar septation is complete by P14, although some alveoli are added until P28. Adult mice (P42) have completed alveolar septation and maturation of their alveolar capillary network.

Selection of time points was determined by trying to balance the ability to detect major regulatory events with the resources required for the analysis. It has been known for a long time that 'Secondary crests rapidly elongate after the 4<sup>th</sup> day, subdividing the primary saccule into alveoli, a process that appears substantially complete by the 14th day'<sup>5</sup>. We have also recently shown, using radial alveolar counts, that most (~80%) of lung development in mice is complete by week 2<sup>6</sup>. Thus, we believe that an intermediate time point would not be very helpful, as there are few genetic and phenotypic changes in lung development between 2 and 6 weeks.

## Obtaining TF and miRNA gene predictions

TF-gene target rankings for 512 position-specific weight matrices (PWMs) of human TFs were obtained by learning general binding preferences of TFs, using genomic features, conservation and different types of Chip-chip experiments, and integrating these preferences with TF motif information<sup>7</sup>. Each PWM was associated with TFs using JASPAR<sup>8</sup> and TRANSFAC<sup>9</sup>, the TF name mapped to the Entrez Gene ID of the TF's coding gene. TFs without mapped ID were removed from the set. After mapping 348 unique Entrez Gene IDs were obtained. A TF was said to regulate a gene if it is within the top 1000 predictions for any of the PWM annotations of the TF. Then each gene in the set of TF-gene interactions obtained, was mapped to its corresponding orthologous mouse gene (determined by mapping to the Mouse genome database and HGNC) and the TF interaction transferred. Genes with more than 5 orthologous mappings were discarded. This procedure resulted in 468,319 TF-gene predictions in mouse.

miRanda predictions were obtained from the microcosm website (<http://www.ebi.ac.uk/enright-srv/microcosm/>) and all mouse predictions with p-value < 0.01 used for prediction.

The targetscan data were downloaded from [http://www.targetscan.org/cgi-bin/targetscan/data\\_download.cgi?db=mmu\\_61](http://www.targetscan.org/cgi-bin/targetscan/data_download.cgi?db=mmu_61) (Release 6.2 from June 2012) the file "Conserved site context+ scores" that contains miRNA-mRNA predictions for several species. All predictions for mouse miRNAs were extracted.

## Obtaining validated miRNA-gene interactions

We retrieved two gold standard sets of mouse miRNA-gene interactions from miRTarBase<sup>10</sup> (544 interactions for 150 miRNAs and 368 genes, median of 2 targets per miRNA) and miRecords<sup>11</sup> (299 interactions for 97 miRNAs and



173 genes, median 1 gene per miRNA).

## Immunoblotting

Cells were lysed in 1ml of M-PER lysis buffer (Pierce, Rockford, IL) and protease inhibitors cocktail (Pierce) for 20 min. The lysates were quantified for protein concentrations using the Bradford assay (Biorad, Hercules, CA). Proteins (15 µg per sample) were separated by SDS-polyacrylamide gel electrophoresis (#456-9034-Biorad) and transferred onto nitrocellulose membranes (Invitrogen, Grand Island, NY). The membranes were blocked with 5% fat free albumin in PBS containing 0.1% Tween-20 (TBS-T) for 40 min and subsequently incubated with FANCD2, GLI3, AURKA or CDT1 (1:200-Santacruz) primary antibodies overnight at 4°C. After washing with PBS-T for 30 minutes at room temperature, the membrane was further incubated with rabbit peroxidase-conjugated secondary antibody 1:10000 for 1.5 hours, followed by 30 minutes of washing with PBS-T. Protein bands were visualized with western lighting Plus-ECL substrate (PerkinElmer).

## Appendix II - Supplementary Results

### Gene ontology path enrichment of mirDREM paths

| path (model figure) | #genes | significant GO terms (corrected p-value ≤ 0.05)                                                                                                                                                                                                                                                                                                                                                                                                                                                                                                      |
|---------------------|--------|------------------------------------------------------------------------------------------------------------------------------------------------------------------------------------------------------------------------------------------------------------------------------------------------------------------------------------------------------------------------------------------------------------------------------------------------------------------------------------------------------------------------------------------------------|
| <b>A</b>            | 217    | carbohydrate binding, drug metabolic process, extracellular region                                                                                                                                                                                                                                                                                                                                                                                                                                                                                   |
| <b>B</b>            | 474    | immune system process, cell surface, cell activation, MHC protein complex, external side of plasma membrane, cell periphery, immune response, response to stimulus, regulation of immune system process, membrane, cell killing, multi-organism process, regulation of cell activation, membrane part, leukocyte differentiation, plasma membrane part, regulation of cell killing, positive regulation of biological process, receptor complex, antigen binding, cell communication, cytokine production, signaling, receptor activity, response to |

|          |      |                                                                                                                                                                                                                                                                                                                                                                                                                                                                                                                                                                                                                                                                                                                                                                                                                                                                                                                             |
|----------|------|-----------------------------------------------------------------------------------------------------------------------------------------------------------------------------------------------------------------------------------------------------------------------------------------------------------------------------------------------------------------------------------------------------------------------------------------------------------------------------------------------------------------------------------------------------------------------------------------------------------------------------------------------------------------------------------------------------------------------------------------------------------------------------------------------------------------------------------------------------------------------------------------------------------------------------|
|          |      | organic substance, positive regulation of cell killing, regulation of leukocyte proliferation, positive regulation of cellular process, peptidyl-tyrosine phosphorylation, positive regulation of protein phosphorylation, positive regulation of immune system process, positive regulation of response to stimulus, defense response, receptor tyrosine kinase binding, hematopoietic or lymphoid organ development, regulation of immune response, leukocyte proliferation, antigen processing and presentation, positive regulation of macromolecule metabolic process, plasma membrane, positive regulation of DNA recombination, intracellular membrane-bounded organelle, positive regulation of programmed cell death, positive regulation of apoptotic process, G-protein coupled chemoattractant receptor activity, cellular response to cytokine stimulus, biological regulation                                 |
| <b>C</b> | 76   | -                                                                                                                                                                                                                                                                                                                                                                                                                                                                                                                                                                                                                                                                                                                                                                                                                                                                                                                           |
| <b>D</b> | 1035 | -                                                                                                                                                                                                                                                                                                                                                                                                                                                                                                                                                                                                                                                                                                                                                                                                                                                                                                                           |
| <b>E</b> | 466  | regulation of immune system process                                                                                                                                                                                                                                                                                                                                                                                                                                                                                                                                                                                                                                                                                                                                                                                                                                                                                         |
| <b>F</b> | 209  | -                                                                                                                                                                                                                                                                                                                                                                                                                                                                                                                                                                                                                                                                                                                                                                                                                                                                                                                           |
| <b>G</b> | 266  | negative regulation of cell growth, regulation of cell growth, regulation of cell ,morphogenesis, cell growth, negative regulation of growth                                                                                                                                                                                                                                                                                                                                                                                                                                                                                                                                                                                                                                                                                                                                                                                |
| <b>H</b> | 865  | nucleic acid binding, membrane-enclosed lumen, nitrogen compound metabolic process, nucleobase-containing compound metabolic process, organelle, organelle part, nucleus, nuclear part, macromolecule biosynthetic process, embryonic organ development, biosynthetic process, cellular metabolic process, cellular macromolecule metabolic process, cellular component organization or biogenesis, S phase, cellular nitrogen compound metabolic process, chromatin binding, skeletal system development, gene expressio                                                                                                                                                                                                                                                                                                                                                                                                   |
| <b>I</b> | 462  | cell cycle, cell division, cell cycle process, non-membrane-bounded organelle, intracellular non-membrane-bounded organelle, chromosome segregation, DNA metabolic process, organelle fission, chromosomal part, organelle part, kinetochore, regulation of cell cycle, nucleus, microtubule-based process, spindle, midbody, chromosome, intracellular, cellular component organization or biogenesis, cellular response to stress, intracellular part, intracellular organelle part, macromolecular complex, microtubule cytoskeleton, regulation of chromosome segregation, macromolecule metabolic process, DNA replication, organelle, cytokinesis, cellular component organization, cellular component organization or biogenesis, DNA-dependent ATPase activity, microtubule cytoskeleton organization, regulation of microtubule-based process, establishment of organelle localization, condensed chromosome outer |

|  |  |                                                                                                                                                                                                                                                                                                                                                                                                                                                                                                                                                                                                                                                                                                                                                                                                                                                                                                                                                                             |
|--|--|-----------------------------------------------------------------------------------------------------------------------------------------------------------------------------------------------------------------------------------------------------------------------------------------------------------------------------------------------------------------------------------------------------------------------------------------------------------------------------------------------------------------------------------------------------------------------------------------------------------------------------------------------------------------------------------------------------------------------------------------------------------------------------------------------------------------------------------------------------------------------------------------------------------------------------------------------------------------------------|
|  |  | kinetochore, maintenance of location in cell, cellular process involved in reproduction, microtubule organizing center, cellular macromolecule metabolic process, M phase of mitotic cell cycle, response to DNA damage stimulus, DNA packaging, maintenance of protein location, organelle organization, protein localization to chromosome, establishment of chromosome localization, microtubule, regulation of cell division, cytoskeletal part, maintenance of location, mitosis, reproductive process, reproduction, multicellular organismal development, protein localization to organelle, membrane-enclosed lumen, sister chromatid segregation, regulation of attachment of spindle microtubules to kinetochore, nucleobase-containing compound metabolic process, structural molecule activity, organelle localization, chromatin assembly or disassembly, cartilage condensation, chromosome centromeric region, regulation of organelle organization, M phase |
|--|--|-----------------------------------------------------------------------------------------------------------------------------------------------------------------------------------------------------------------------------------------------------------------------------------------------------------------------------------------------------------------------------------------------------------------------------------------------------------------------------------------------------------------------------------------------------------------------------------------------------------------------------------------------------------------------------------------------------------------------------------------------------------------------------------------------------------------------------------------------------------------------------------------------------------------------------------------------------------------------------|

Supplementary Table S1: GO enrichment (Gene ontologizer 2.0, parent-child-union method<sup>12</sup>) of all genes annotated to one of the 9 paths in the miRDREM model. The GO terms are listed in order of significance.

### Overlap with validated miRNA-gene interactions

| Method      | miR     | gene   | in miRecords? | in miRTarBase ? |
|-------------|---------|--------|---------------|-----------------|
| Correlation | miR-29a | FBN1   | 1             | 1               |
| Correlation | miR-29b | BAK1   | 1             | 0               |
| GenMiR++    | miR-21  | PDCD4  | 1             | 1               |
| GenMiR++    | miR-21  | PELI1  | 1             | 1               |
| GenMiR++    | miR-1   | TMSB4X | 0             | 1               |
| GenMiR++    | miR-1   | FN1    | 1             | 0               |
| mirDREM     | miR-29a | ELN    | 1             | 1               |
| mirDREM     | miR-29a | FBN1   | 1             | 1               |
| mirDREM     | miR-29b | ELN    | 1             | 1               |
| mirDREM     | miR-29b | FBN1   | 1             | 1               |

Supplementary Table S2: List of experimentally validated miRNA-gene interactions as listed in miRecords<sup>11</sup> and/or miRTarBase<sup>10</sup>. For each method tested, Correlation, GenMiR++ and

miRDREM, the miRNA (2nd col) and the target gene (3rd col) relationship that are experimentally validated in miRecords (4th col) or miRTarBase (last col) are denoted with a 1.

## GO analysis of top-300 ranked genes by different methods

| GO ID      | adjusted p-value | GO term                                     |
|------------|------------------|---------------------------------------------|
| GO:0002376 | 2.38E-05         | immune system process                       |
| GO:0048534 | 2.38E-05         | hematopoietic or lymphoid organ development |
| GO:0019222 | 0.000707202      | regulation of metabolic process             |
| GO:0002520 | 0.002186906      | immune system development                   |
| GO:0002521 | 0.002186906      | leukocyte differentiation                   |

Supplemental Table S3 – Top 5 enriched significant (adj.  $p < 0.05$ ) GO terms for rankings obtained with mirDREM (miRanda) (all significant GO terms can be found in SI Appendix III, Dataset S2).

| GO ID      | adjusted p-value | GO term                |
|------------|------------------|------------------------|
| GO:0032991 | 5.42E-15         | macromolecular complex |
| GO:0044391 | 1.51E-14         | ribosomal subunit      |
| GO:0043226 | 8.24E-14         | organelle              |
| GO:0005840 | 1.34E-12         | ribosome               |
| GO:0044445 | 4.06E-12         | cytosolic part         |

Supplemental Table S4 – Top 5 enriched significant (adj.  $p < 0.05$ ) GO terms for rankings obtained with GenMiR++ (all significant GO terms can be found in SI Appendix III, Dataset S2).

| GO ID      | adjusted p-value | GO term                             |
|------------|------------------|-------------------------------------|
| GO:0005057 | 0.000732251      | receptor signaling protein activity |
| GO:0019955 | 0.013441651      | cytokine binding                    |
| GO:0004896 | 0.047327904      | cytokine receptor activity          |

Supplemental Table S5 – Top 5 enriched significant (adj.  $p < 0.05$ ) GO terms for rankings obtained with Pearson Correlation.

| GO ID      | adjusted p-value | GO term                           |
|------------|------------------|-----------------------------------|
| GO:0007049 | 0.0007           | cell cycle                        |
| GO:0042101 | 0.002            | T cell receptor complex           |
| GO:0002376 | 0.004            | immune system process             |
| GO:0035556 | 0.004            | intracellular signal transduction |
| GO:0005488 | 0.007            | binding                           |

Supplemental Table S6 – Top 5 enriched significant (adj.  $p < 0.05$ ) GO terms for rankings obtained with model without negative regulatory constraints for miRNAs (all significant GO terms can be found in SI Appendix III, Dataset S2).

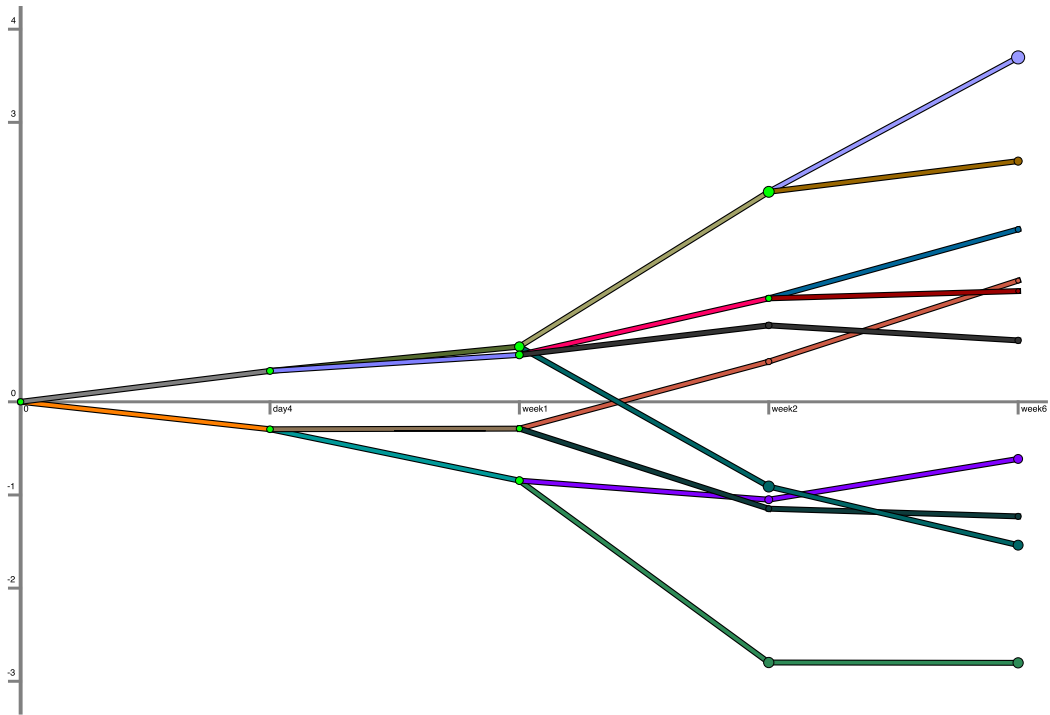

Supplementary Figure S3: Network structure of mirDREM model for learning without negativity constraints. In Supplementary Table S7 (below) are the miRNAs associated to split nodes.

let-7a ,let-7a\* ,let-7b ,let-7b\* ,let-7c ,let-7c-1\* ,let-7d ,let-7d\* ,let-7e ,let-7f ,let-7f\* ,let-7g ,let-7g\* ,let-7i ,let-7i\* ,miR-1 ,miR-100 ,miR-101a ,miR-101a\* ,miR-101b ,miR-103 ,miR-106a ,miR-106b ,miR-107 ,miR-10a\* ,miR-10b ,miR-124 ,miR-125a-3p ,miR-125a-5p ,miR-125b-3p ,miR-125b-5p ,miR-126-3p ,miR-127 ,miR-127\* ,miR-128a ,miR-130b\* ,miR-132 ,miR-133a ,miR-133b ,miR-134 ,miR-135b ,miR-137 ,miR-138 ,miR-139-3p ,miR-139-5p ,miR-140 ,miR-141 ,miR-146a ,miR-147 ,miR-148a\* ,miR-149 ,miR-150 ,miR-150\* ,miR-151-3p ,miR-151-5p ,miR-152 ,miR-154 ,miR-154\* ,miR-155 ,miR-15a ,miR-15b ,miR-15b\* ,miR-16 ,miR-16\* ,miR-17 ,miR-181a-2\* ,miR-181b ,miR-181c ,miR-181d ,miR-184 ,miR-186 ,miR-187 ,miR-188-3p ,miR-188-5p ,miR-18a ,miR-18a\* ,miR-18b ,miR-190 ,miR-190b ,miR-192 ,miR-193 ,miR-193\* ,miR-196b ,miR-199a-3p ,miR-199a-5p ,miR-19a ,miR-19a\* ,miR-19b ,miR-200c ,miR-202-3p ,miR-204 ,miR-207 ,miR-208 ,miR-208b ,miR-20a ,miR-20a\* ,miR-20b ,miR-21 ,miR-212 ,miR-214 ,miR-216a ,miR-216b ,miR-217 ,miR-218-2\* ,miR-219 ,miR-22 ,miR-222 ,miR-223 ,miR-224 ,miR-23a ,miR-23b ,miR-24 ,miR-25 ,miR-26b ,miR-26b\* ,miR-27a ,miR-27b ,miR-27b\* ,miR-28 ,miR-28\* ,miR-290-3p ,miR-290-5p ,miR-291a-5p ,miR-291b-5p ,miR-292-3p ,miR-293 ,miR-294 ,miR-295 ,miR-296-3p ,miR-296-5p ,miR-297a ,miR-297b-5p ,miR-297c ,miR-298 ,miR-29a ,miR-29a\* ,miR-29b ,miR-29c ,miR-29c\* ,miR-301a ,miR-301b ,miR-302a\* ,miR-302c ,miR-302c\* ,miR-30a ,miR-30b\* ,miR-30c-1\* ,miR-30d ,miR-30e ,miR-31 ,miR-31\* ,miR-32 ,miR-322 ,miR-323-3p ,miR-323-5p ,miR-324-3p ,miR-324-5p ,miR-325 ,miR-325\* ,miR-326 ,miR-327 ,miR-328 ,miR-330 ,miR-331-5p ,miR-335-3p ,miR-337-3p ,miR-337-5p ,miR-338-5p ,miR-339-3p ,miR-339-5p ,miR-340-3p ,miR-340-5p ,miR-341 ,miR-342-3p ,miR-342-5p ,miR-343 ,miR-344 ,miR-345-3p ,miR-345-5p ,miR-34a ,miR-34b-3p ,miR-34c ,miR-34c\* ,miR-350 ,miR-361 ,miR-362-3p ,miR-363 ,miR-365 ,miR-367 ,miR-369-3p ,miR-376a\* ,miR-376b\*

,miR-376c\* ,miR-377 ,miR-378 ,miR-379 ,miR-380-3p ,miR-381 ,miR-382\* ,miR-383 ,miR-384-3p ,miR-384-5p ,miR-411\* ,miR-412 ,miR-423-3p ,miR-423-5p ,miR-425 ,miR-429 ,miR-431 ,miR-431\* ,miR-433 ,miR-433\* ,miR-449a ,miR-449c ,miR-450a-3p ,miR-450a-5p ,miR-450b-3p ,miR-450b-5p ,miR-452 ,miR-453 ,miR-455 ,miR-455\* ,miR-463 ,miR-465a-3p ,miR-465a-5p ,miR-466a-3p ,miR-466a-5p ,miR-466b-3-3p ,miR-466b-5p ,miR-466c-5p ,miR-466d-3p ,miR-466e-5p ,miR-466f-3p ,miR-466f-5p ,miR-466g ,miR-467a ,miR-467a\* ,miR-467b\* ,miR-467c ,miR-467d ,miR-467e ,miR-467e\* ,miR-468 ,miR-469 ,miR-471 ,miR-483 ,miR-484 ,miR-485 ,miR-486 ,miR-488 ,miR-488\* ,miR-489 ,miR-490 ,miR-493 ,miR-494 ,miR-495 ,miR-497 ,miR-500 ,miR-501-3p ,miR-503 ,miR-503\* ,miR-505 ,miR-509-3p ,miR-511 ,miR-532-3p ,miR-532-5p ,miR-539 ,miR-540-3p ,miR-551b ,miR-568 ,miR-574-3p ,miR-582-5p ,miR-590-3p ,miR-590-5p ,miR-615-3p ,miR-615-5p ,miR-652 ,miR-654-3p ,miR-654-5p ,miR-665 ,miR-666-3p ,miR-666-5p ,miR-667 ,miR-668 ,miR-669a ,miR-669b ,miR-670 ,miR-671-3p ,miR-671-5p ,miR-673-3p ,miR-673-5p ,miR-675-5p ,miR-676 ,miR-676\* ,miR-677 ,miR-680 ,miR-681 ,miR-682 ,miR-684 ,miR-685 ,miR-686 ,miR-687 ,miR-688 ,miR-689 ,miR-690 ,miR-691 ,miR-692 ,miR-693-5p ,miR-694 ,miR-695 ,miR-696 ,miR-697 ,miR-700 ,miR-701 ,miR-702 ,miR-703 ,miR-705 ,miR-707 ,miR-709 ,miR-711 ,miR-714 ,miR-715 ,miR-717 ,miR-718 ,miR-720 ,miR-742 ,miR-743a ,miR-743b-3p ,miR-743b-5p ,miR-744 ,miR-758 ,miR-759 ,miR-760 ,miR-761 ,miR-762 ,miR-764-3p ,miR-764-5p ,miR-770-3p ,miR-7a\* ,miR-7b ,miR-801 ,miR-804 ,miR-805 ,miR-872 ,miR-872\* ,miR-873 ,miR-875-5p ,miR-876-3p ,miR-876-5p ,miR-877\* ,miR-879 ,miR-880 ,miR-881 ,miR-882 ,miR-883b-3p ,miR-883b-5p ,miR-9 ,miR-9\* ,miR-92a ,miR-92a\* ,miR-92b ,miR-93\* ,miR-96 ,miR-98 ,miR-99a ,miR-99b\*

Supplementary Table S7: Predicted miRNAs in the mirDREM model without negativity constraints (for learning and path assignments) for the lung development data.

## Robustness analysis of mirDREM

### Parameter robustness

| Penalty | paths | sign. miRs | Overlap with default |
|---------|-------|------------|----------------------|
| 20      | 9     | 58         | 49                   |
| 25      | 9     | 58         | 49                   |
| 30      | 9     | 58         | 49                   |
| 35      | 9     | 58         | 49                   |
| 40      | 9     | 56         | 56                   |
| 45      | 9     | 56         | 56                   |
| 50      | 9     | 55         | 47                   |

Supplementary Table S8: Effect of the AIC penalty term (1st column) for the model structure search (number of paths in the model, 2nd column), the number of predicted miRNAs (3rd column) and the overlap with default parameters (4th column).

| scaling weight | paths | sign. miRs | Overlap with default |
|----------------|-------|------------|----------------------|
| 1              | 9     | 56         | 56                   |

|     |   |    |    |
|-----|---|----|----|
| 1.5 | 9 | 56 | 56 |
| 0.5 | 9 | 56 | 56 |

Supplementary Table S9: Effect of the scaling weight (1st column) in the regulatory potential score on network learning (number of paths in the model, 2nd column), the number of predicted miRNAs (3rd column) and the overlap with default parameters (4th column).

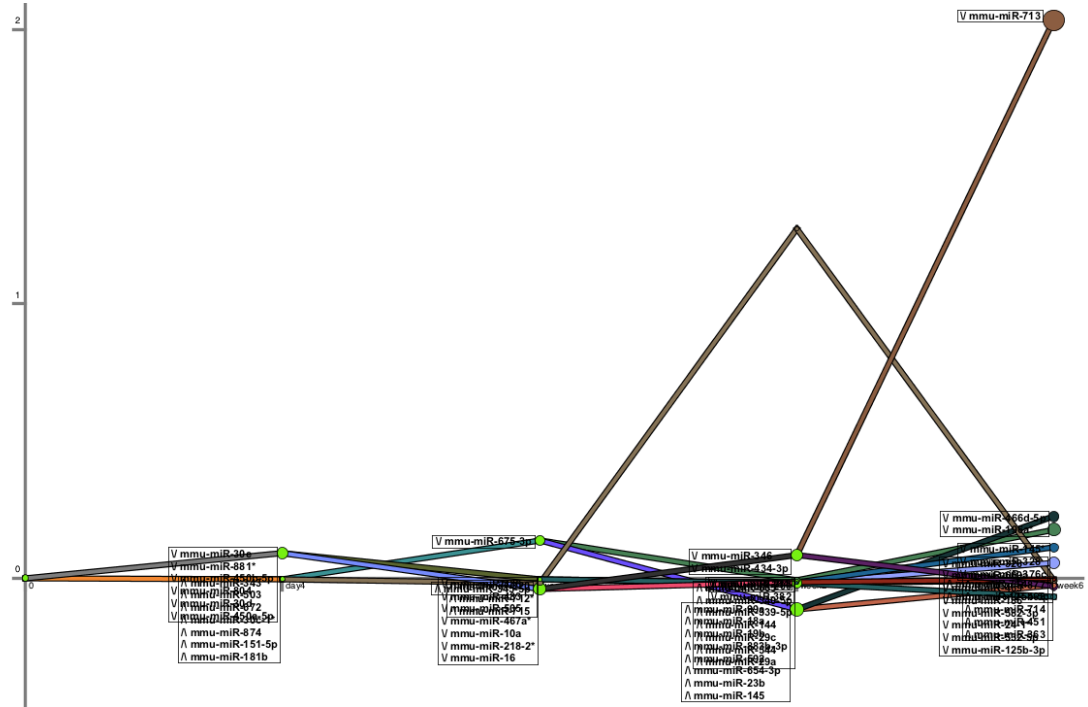

Supplementary Figure S4: mirDREM model on randomly shuffled gene expression ratios. No significant enrichment of GO terms could be found in the top300 genes (Analysis as in Supplementary Tables S3-S5). Supporting the fact that the model does not recover important and relevant biological properties.

**RT-qPCR of selected miRNAs in lung epithelial cells**

RT-qPCR experiments were conducted in order to decide if we design the transfection experiments as a miRNA over expression or miRNA knock down experiment. The resulting expression levels are shown in Supplementary Figure S5.

### miRNA Expression in mouse lung epithelial cells

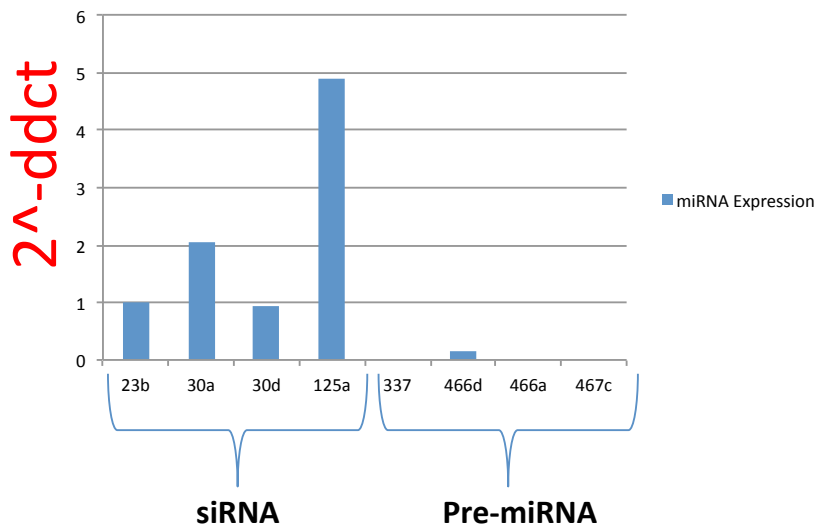

Supplementary Figure S5: qPCR measurement of the 8 investigated miRNAs in a lung epithelial cell line. miR 23b, 30a, 30d, and 125a were sufficiently expressed and therefore siRNAs against the mature miRNA sequences were designed to observe the effect of knockdown. For miR-337, 466d, 466a, and 467c all of which occurred at low expression level, additional pre-miRNA molecules were introduced to measure the effect of overexpression in the cell line.

### Validation of mirDREM paths by miRNA transfection

Below we list an additional result concerning the hypergeometric enrichment of affected miRNA targets after miRNA transfection in MLE-12 cells in the mirDREM paths (Table 1).

| miRNA       | significant paths in opposite direction |         |           |
|-------------|-----------------------------------------|---------|-----------|
|             | Top 1000                                | Top 500 | Top 3000  |
| miR-125a-5p | A,B,C+E                                 | A,B,C+E | A,B,C+E,F |
| miR-337-5p  | B,C+E                                   | B, C+E  | B, C+E,F  |
| miR-467c    | D                                       | -       | D         |
| miR-466a-3p | D                                       | -       | D         |
| miR-466d-3p | D                                       | D       | D,H       |
| miR-30d     | H                                       | -       | H         |
| miR-30a     | -                                       | -       | -         |
| miR-23b     | -                                       | -       | -         |

Supplementary Table S10: Significantly enriched mirDREM paths (Figure 2) after miRNA transfection for different cutoffs of top (500,1000,3000) genes using the hypergeometric enrichment test with multiple testing correction and  $p \leq 0.05$ .



## Validation of individual miRNA-gene targets by transfection and immunoblotting

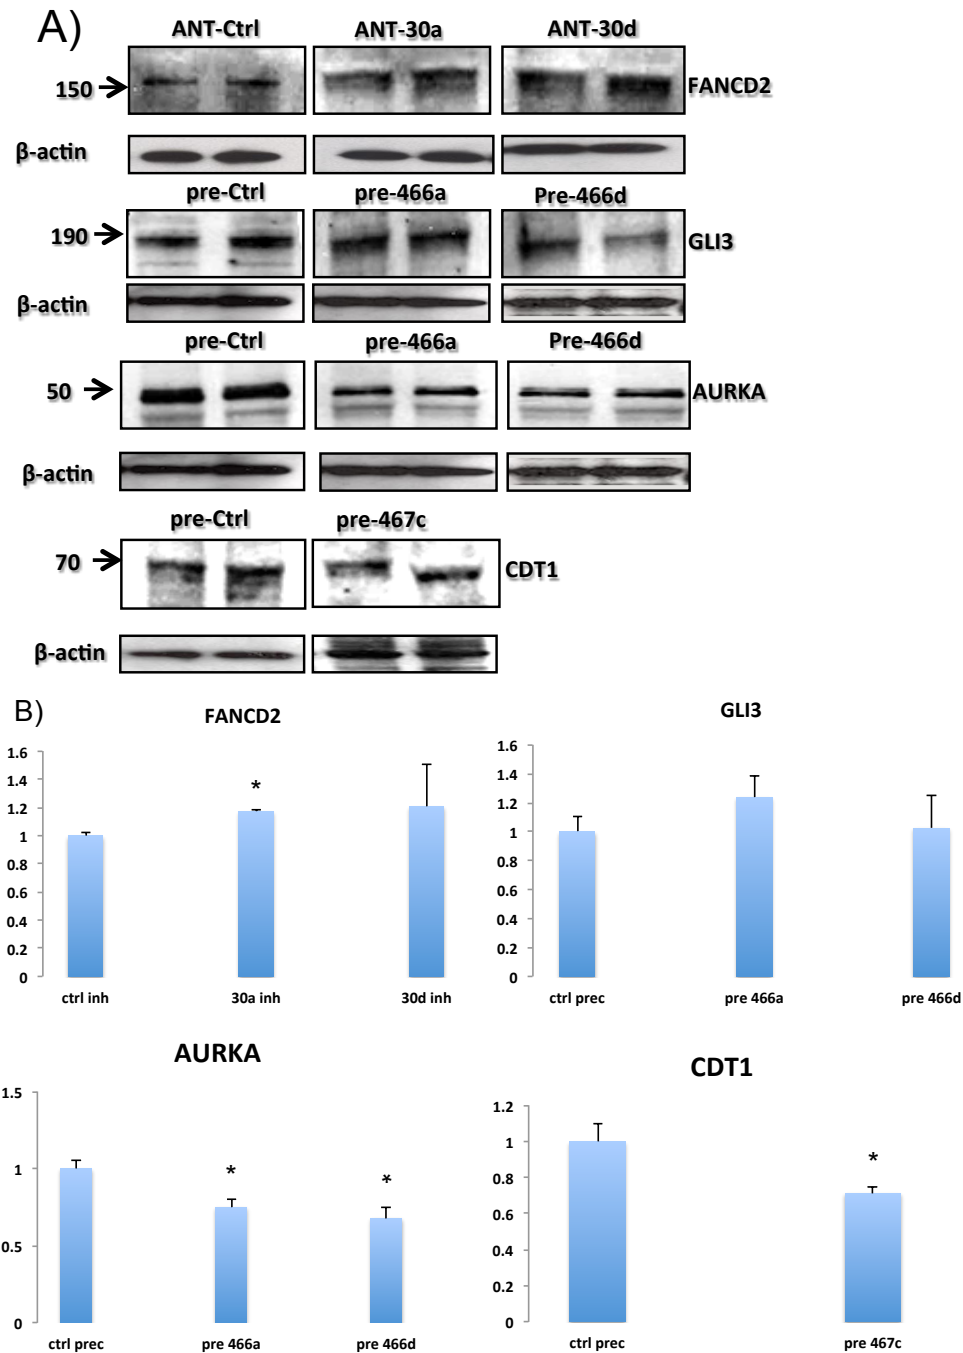

Supplementary Figure S6: Results of miRNA transfection in MLE-12 cells and subsequent immunoblotting with antibodies against proteins for corresponding miRNA targets. A) Pictures of protein bands after transfection of miR-30a/d antagonists and miR-466a/d, miR-467c precursors with two replicates. The first column in each row denotes the control without transfection of antagonist/precursor. Levels of beta-actin, shown below, serve for normalization. B) Bar plot with standard deviation of quantified blotting intensity from pictures in A). Results that are significant with p-value < 0.05 are denoted with \* above the bar.

## Analysis of significant miRNAs in patients with Idiopathic Pulmonary Fibrosis (IPF)

| Patient Cohort | 1                                                                                                      | 2                                 | 3                                 | Mouse model                                  |
|----------------|--------------------------------------------------------------------------------------------------------|-----------------------------------|-----------------------------------|----------------------------------------------|
|                | 142 control vs 162 IPF (LGRC <a href="http://www.lung-genomics.org">http://www.lung-genomics.org</a> ) | 28 control vs 33 IPF (TissueBank) | 10 control vs 10 IPF (TissueBank) | bleomycin at 14d (Liu et al. <sup>15</sup> ) |
| miR-125a       | -                                                                                                      | -                                 | down                              | down                                         |
| miR-30a        | down                                                                                                   | down                              | down                              | down                                         |
| miR-30d        | down                                                                                                   | down                              | down                              | down                                         |
| miR-467c       | -                                                                                                      | -                                 | -                                 | -                                            |
| miR-337        | up                                                                                                     | up                                | -                                 | -                                            |
| miR-466a-3p    | -                                                                                                      | -                                 | -                                 | down                                         |
| miR-466d-3p    | -                                                                                                      | -                                 | -                                 | down                                         |

Supplementary Table S11: Expression of the 7 candidate miRNAs for lung development in 4 public data sets of idiopathic pulmonary fibrosis (IPF). 6 out of 7 miRNAs are found to be de-regulated (significantly down- or up-regulated) in at least one of the data sets, highlighting a potential role in IPF progression.

### Using TargetScan predictions for network construction

We have also tested mirDREM using a different computationally predicted set of miRNA-mRNA interactions (TargetScan<sup>13</sup>). Roughly a third of the 56 miRNAs are predicted by both networks, an overlap that is similar to previous analyses comparing computationally derived miRNA-gene interactions <sup>14</sup>. While this overlap is not very large, several of the miRNAs we experimentally validated were also included in the TargetScan results and similar GO terms are enriched. This indicates that using the intersection of miRNAs identified by multiple computational methods may improve the accuracy of regulatory models for miRNA regulation. The results are summarized in Supplementary Figure S7 and Supplementary Tables S12-14.

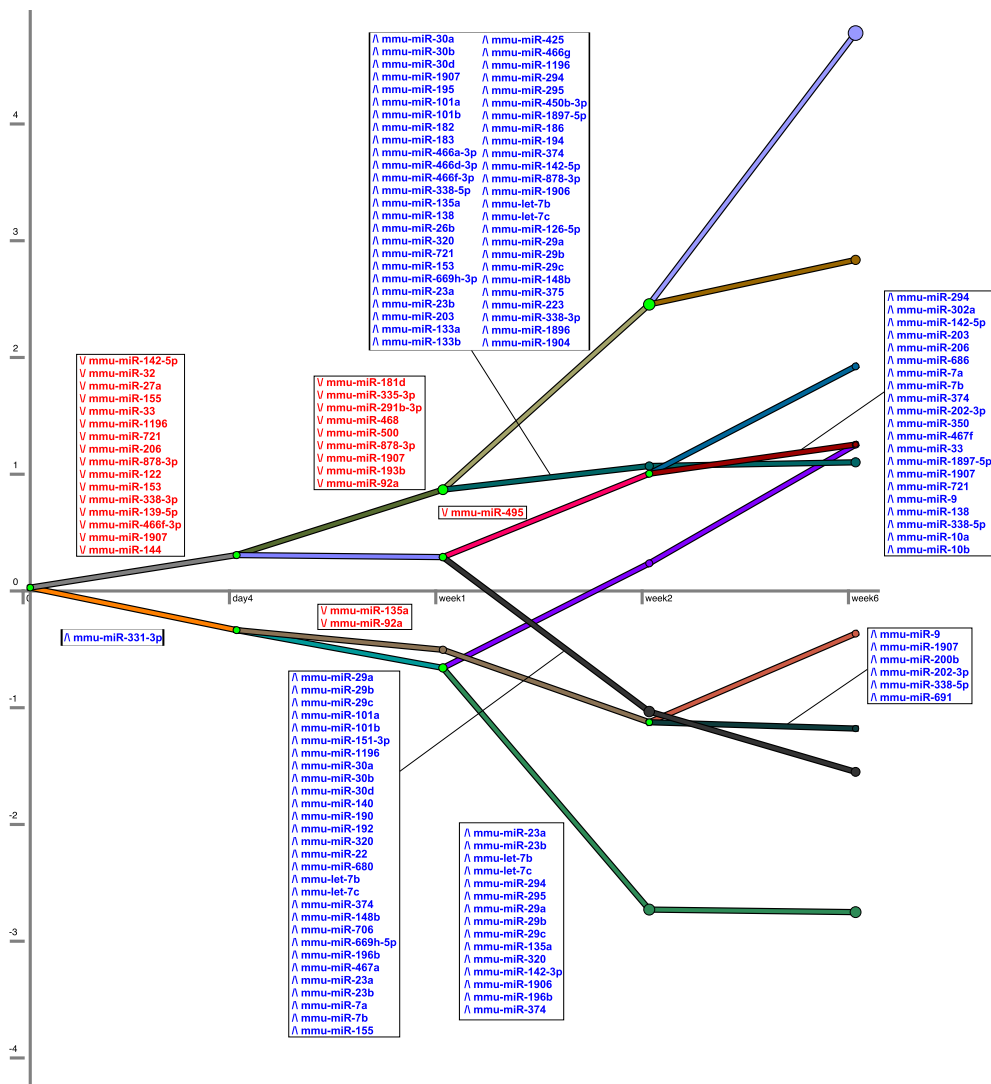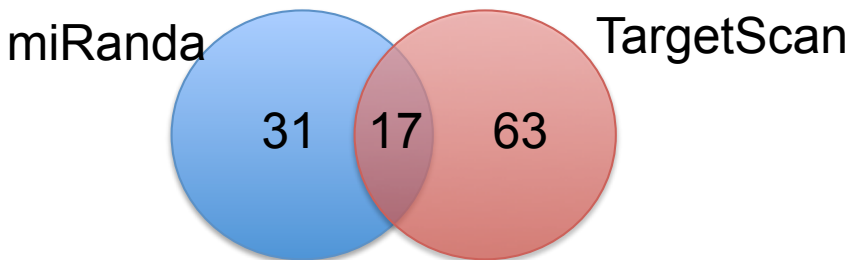

Supplementary Figure S7. (Top) Network model learnt with mirDREM and predicted TargetScan interactions. (Bottom) Overlap of predicted miRNAs in dynamic networks created with miRDREM using either miRanda or TargetScan predictions.

| GO ID      | adjusted p-value | GO term                                     |
|------------|------------------|---------------------------------------------|
| GO:0002376 | 6.43E-07         | immune system process                       |
| GO:0048534 | 1.48E-04         | hematopoietic or lymphoid organ development |
| GO:0048518 | 1.48E-04         | positive regulation of biological process   |
| GO:0005488 | 0.001970531      | binding                                     |
| GO:0002682 | 0.001970531      | regulation of immune system process         |

Supplemental Table S12 – Top 5 enriched significant (adj.  $p < 0.05$ ) GO terms for rankings obtained with mirDREM (TargetScan) (all significant GO terms can be found in SI Appendix III, Dataset S2).

| validated miR  | in TargetScan prediction set                    | in mirDREM model TargetScan |
|----------------|-------------------------------------------------|-----------------------------|
| <b>30a</b>     | 1                                               | 1                           |
| <b>30d</b>     | 1                                               | 1                           |
| <b>466d-3p</b> | 1                                               | 1                           |
| <b>466a-3p</b> | 1                                               | 1                           |
| <b>337-5p</b>  | 1 (only 2 targets total)                        | 0                           |
| <b>467c</b>    | 1 (only 10 targets overlap miRanda predictions) | 0                           |
| <b>125-5p</b>  | 0                                               | 0                           |

Supplementary Table S13: Detailed analysis of validated miRNAs compared to predicted made in the mirDREM TargetScan model. All validated miRs (1st col) that occur in the TargetScan prediction set are denoted with a 1 and 0 otherwise (2nd col), similarly if they occur in the mirDREM model constructed from TargetScan interactions (3rd col).

| miR    | Gene symbol                                                                                                 |
|--------|-------------------------------------------------------------------------------------------------------------|
| 155    | SATB1,THOC1                                                                                                 |
| 23b    | MARCKSL1, 6720463M24RIK,FREM1                                                                               |
| 29a    | IBSP, GPR156,9930013L23RIK,COL4A1, ELN,CCDC80,D0H4S114, PPIC, PER3 NPAS3, EMID1,PTX3,FBN1,TMEM132A,GPR37    |
| 29b    | IBSP,GPR156,9930013L23RIK,COL4A1,ELN, CCDC80,D0H4S114,PPIC,PER3,NPAS3,EMID1,FBN1 CD276,TMEM132A,GPR37,MFAP2 |
| 29c    | IBSP,GPR156,9930013L23RIK,COL4A1,ELN,CCDC80, D0H4S114,PPIC,PER3,NPAS3,EMID1,PTX3,FBN1 TMEM132A,GPR37        |
| 32     | IBSP,RHPN2,NPNT,TCF21,EVI5,CD69,BCL11B COL27A1,NOX4,MYO1B,EOMES,RSBN1,PCOLCE2 DNAJB9,GFPT2,KLF2             |
| 338-5p | ARHGAP21,RNF19B,KLF2                                                                                        |
| 878-3p | MEF2C, TOP2B                                                                                                |

Supplementary Table S14: List of predicted miRNAs and targets that are shared in the mirDREM networks build with either miRanda or TargetScan predictions.

## References

1. Ernst, J., Vainas, O., Harbison, C. T., Simon, I. & Bar-Joseph, Z. Reconstructing dynamic regulatory maps. *Mol. Syst. Biol.* **3**, 74 (2007).
2. Krishnapuram, B., Carin, L., Figueiredo, M. A. T. & Hartemink, A. J. Sparse multinomial logistic regression: fast algorithms and generalization bounds. *IEEE Trans Pattern Anal Mach Intell* **27**, 957–968 (2005).
3. Anand, R. & Reddy, C. K. Constrained logistic regression for discriminative pattern mining. *Machine Learning and Knowledge Discovery in Databases* **6911**, 92–107 (2011).
4. Biegler, L. T. *Nonlinear Programming: Concepts, Algorithms, and Applications to Chemical Processes (MPS-SIAM Series on Optimization)*. (SIAM-Society for Industrial and Applied Mathematics, 2010).
5. Amy, R. W., Bowes, D., Burri, P. H., Haines, J. & Thurlbeck, W. M. Postnatal growth of the mouse lung. *J. Anat.* **124**, 131–151 (1977).
6. Nicola, T. *et al.* Loss of Thy-1 inhibits alveolar development in the newborn mouse lung. *Am. J. Physiol. Lung Cell Mol. Physiol.* **296**, L738–50 (2009).
7. Ernst, J., Plasterer, H. L., Simon, I. & Bar-Joseph, Z. Integrating multiple evidence sources to predict transcription factor binding in the human genome. *Genome Res.* **20**, 526–536 (2010).
8. Vlieghe, D. *et al.* A new generation of JASPAR, the open-access repository for transcription factor binding site profiles. *Nucleic Acids Res.* **34**, D95–7 (2006).
9. Matys, V. *et al.* TRANSFAC and its module TRANSCompel: transcriptional gene regulation in eukaryotes. *Nucleic Acids Res.* **34**, D108–10 (2006).
10. Hsu, S.-D. *et al.* miRTarBase: a database curates experimentally validated microRNA-target interactions. *Nucleic Acids Res.* **39**, D163–9 (2011).
11. Xiao, F. *et al.* miRecords: an integrated resource for microRNA-target interactions. *Nucleic Acids Res.* **37**, D105–10 (2009).
12. Bauer, S., Grossmann, S., Vingron, M. & Robinson, P. N. Ontologizer 2.0--a multifunctional tool for GO term enrichment analysis and data exploration. *Bioinformatics* **24**, 1650–1651 (2008).
13. Friedman, R. C., Farh, K. K.-H., Burge, C. B. & Bartel, D. P. Most mammalian mRNAs are conserved targets of microRNAs. *Genome Res.* **19**, 92–105 (2009).
14. Sethupathy, P., Megraw, M. & Hatzigeorgiou, A. G. A guide through present computational approaches for the identification of mammalian microRNA targets. *Nat. Methods* **3**, 881–886 (2006).

15. Liu, G. *et al.* miR-21 mediates fibrogenic activation of pulmonary fibroblasts and lung fibrosis. *J. Exp. Med.* **207**, 1589–1597 (2010).

### **Appendix III – Supplemental Datasets**

**Dataset S1:** A list of the predicted miRNA-gene interactions for the lung development data with mirDREM and miRanda interactions. The predictions are sorted by split node (see Figure 1 in the paper). We supply the miRNA ID, mouse gene symbol, timepoint after the split node and split node number.

| <b>miRNA ID</b> | <b>Gene symbol</b> | <b>time point</b> | <b>associated split node</b> |
|-----------------|--------------------|-------------------|------------------------------|
| mmu-miR-551b    | PLXNA3             | day4              | 1                            |
| mmu-miR-551b    | CADM4              | day4              | 1                            |
| mmu-miR-551b    | SLC45A1            | day4              | 1                            |
| mmu-miR-551b    | CRLF1              | day4              | 1                            |
| mmu-miR-551b    | TIPIN              | day4              | 1                            |
| mmu-miR-551b    | IGF2BP1            | day4              | 1                            |
| mmu-miR-551b    | TIMM50             | day4              | 1                            |
| mmu-miR-551b    | SAE1               | day4              | 1                            |
| mmu-miR-551b    | TRIM72             | day4              | 1                            |
| mmu-miR-551b    | CITED4             | day4              | 1                            |
| mmu-miR-551b    | CCHCR1             | day4              | 1                            |
| mmu-miR-551b    | METRN              | day4              | 1                            |
| mmu-miR-551b    | DCPP1              | day4              | 1                            |
| mmu-miR-551b    | BOK                | day4              | 1                            |
| mmu-miR-551b    | PTK2B              | day4              | 1                            |
| mmu-miR-551b    | RASL10A            | day4              | 1                            |
| mmu-miR-551b    | BCL3               | day4              | 1                            |
| mmu-miR-551b    | A630055G03RIK      | day4              | 1                            |
| mmu-miR-551b    | POPDC2             | day4              | 1                            |
| mmu-miR-551b    | TLX2               | day4              | 1                            |
| mmu-miR-551b    | ICAM1              | day4              | 1                            |
| mmu-miR-551b    | CENPN              | day4              | 1                            |
| mmu-miR-551b    | HAPLN3             | day4              | 1                            |
| mmu-miR-551b    | SLC22A7            | day4              | 1                            |
| mmu-miR-551b    | OLFML2B            | day4              | 1                            |
| mmu-miR-551b    | CRTAP              | day4              | 1                            |
| mmu-miR-551b    | NPL                | day4              | 1                            |
| mmu-miR-551b    | GIF                | day4              | 1                            |
| mmu-miR-551b    | AK7                | day4              | 1                            |
| mmu-miR-551b    | WDR90              | day4              | 1                            |
| mmu-miR-551b    | NAALAD2            | day4              | 1                            |
| mmu-miR-551b    | NTS                | day4              | 1                            |
| mmu-miR-551b    | PLK1               | day4              | 1                            |
| mmu-miR-551b    | ASPHD2             | day4              | 1                            |
| mmu-miR-551b    | ABCC3              | day4              | 1                            |
| mmu-miR-551b    | RPL3L              | day4              | 1                            |
| mmu-miR-551b    | CHTF18             | day4              | 1                            |
| mmu-miR-551b    | TCF19              | day4              | 1                            |
| mmu-miR-551b    | ALOX5              | day4              | 1                            |
| mmu-miR-551b    | VSIG4              | day4              | 1                            |
| mmu-miR-551b    | CAR6               | day4              | 1                            |

|              |               |      |   |
|--------------|---------------|------|---|
| mmu-miR-551b | RERE          | day4 | 1 |
| mmu-miR-551b | PDZD4         | day4 | 1 |
| mmu-miR-690  | PRPH          | day4 | 1 |
| mmu-miR-690  | MAD1L1        | day4 | 1 |
| mmu-miR-690  | PPP1R14D      | day4 | 1 |
| mmu-miR-690  | 6330403K07RIK | day4 | 1 |
| mmu-miR-690  | MRE11A        | day4 | 1 |
| mmu-miR-690  | CLDN6         | day4 | 1 |
| mmu-miR-690  | FCNB          | day4 | 1 |
| mmu-miR-690  | ASZ1          | day4 | 1 |
| mmu-miR-690  | AURKA         | day4 | 1 |
| mmu-miR-690  | KCNIP2        | day4 | 1 |
| mmu-miR-690  | AGXT          | day4 | 1 |
| mmu-miR-690  | HOXD10        | day4 | 1 |
| mmu-miR-690  | CKB           | day4 | 1 |
| mmu-miR-690  | GATA1         | day4 | 1 |
| mmu-miR-690  | TRAM2         | day4 | 1 |
| mmu-miR-690  | TIAM2         | day4 | 1 |
| mmu-miR-690  | 1700026D08RIK | day4 | 1 |
| mmu-miR-690  | NUDT8         | day4 | 1 |
| mmu-miR-690  | KIF4          | day4 | 1 |
| mmu-miR-690  | ARMCX4        | day4 | 1 |
| mmu-miR-690  | E030010A14RIK | day4 | 1 |
| mmu-miR-690  | ARHGAP9       | day4 | 1 |
| mmu-miR-690  | KIF11         | day4 | 1 |
| mmu-miR-690  | RCOR2         | day4 | 1 |
| mmu-miR-690  | MOSC1         | day4 | 1 |
| mmu-miR-690  | EMILIN3       | day4 | 1 |
| mmu-miR-690  | WEE1          | day4 | 1 |
| mmu-miR-690  | NCAPD2        | day4 | 1 |
| mmu-miR-690  | 1700011H14RIK | day4 | 1 |
| mmu-miR-690  | GYLTL1B       | day4 | 1 |
| mmu-miR-690  | NPY           | day4 | 1 |
| mmu-miR-690  | RYR3          | day4 | 1 |
| mmu-miR-690  | TROAP         | day4 | 1 |
| mmu-miR-690  | HSD11B2       | day4 | 1 |
| mmu-miR-690  | PLA2G4C       | day4 | 1 |
| mmu-miR-484  | GDF2          | day4 | 1 |
| mmu-miR-484  | LZTS1         | day4 | 1 |
| mmu-miR-484  | 1700026J04RIK | day4 | 1 |
| mmu-miR-484  | SYT5          | day4 | 1 |
| mmu-miR-484  | ARSI          | day4 | 1 |
| mmu-miR-484  | SUSD2         | day4 | 1 |
| mmu-miR-484  | UNC93B1       | day4 | 1 |
| mmu-miR-484  | AURKA         | day4 | 1 |
| mmu-miR-484  | PRDX2         | day4 | 1 |



|             |               |      |   |
|-------------|---------------|------|---|
| mmu-miR-484 | BDKRB2        | day4 | 1 |
| mmu-miR-484 | SHF           | day4 | 1 |
| mmu-miR-484 | 4930451C15RIK | day4 | 1 |
| mmu-miR-484 | 2010001M09RIK | day4 | 1 |
| mmu-miR-484 | HIC1          | day4 | 1 |
| mmu-miR-484 | SERPINA9      | day4 | 1 |
| mmu-miR-484 | NCAPH         | day4 | 1 |
| mmu-miR-484 | SLC2A5        | day4 | 1 |
| mmu-miR-484 | NFATC4        | day4 | 1 |
| mmu-miR-484 | UCK2          | day4 | 1 |
| mmu-miR-484 | HHATL         | day4 | 1 |
| mmu-miR-484 | LRRC20        | day4 | 1 |
| mmu-miR-484 | 6230427J02RIK | day4 | 1 |
| mmu-miR-484 | LRRC3         | day4 | 1 |
| mmu-miR-484 | SLC8A2        | day4 | 1 |
| mmu-miR-484 | SLAMF9        | day4 | 1 |
| mmu-miR-484 | LIG1          | day4 | 1 |
| mmu-miR-484 | PSRC1         | day4 | 1 |
| mmu-miR-484 | SLC6A13       | day4 | 1 |
| mmu-miR-484 | FTCD          | day4 | 1 |
| mmu-miR-484 | ILF3          | day4 | 1 |
| mmu-miR-484 | 4930572J05RIK | day4 | 1 |
| mmu-miR-484 | EMILIN2       | day4 | 1 |
| mmu-miR-484 | MOXD1         | day4 | 1 |
| mmu-miR-484 | MXD3          | day4 | 1 |
| mmu-miR-484 | SERPINA3K     | day4 | 1 |
| mmu-miR-484 | ITGB1BP3      | day4 | 1 |
| mmu-miR-484 | PSORS1C2      | day4 | 1 |
| mmu-miR-484 | DUSP9         | day4 | 1 |
| mmu-miR-484 | 2310043J07RIK | day4 | 1 |
| mmu-miR-484 | MGAT5         | day4 | 1 |
| mmu-miR-484 | ADD2          | day4 | 1 |
| mmu-miR-484 | PTAFR         | day4 | 1 |
| mmu-miR-484 | DMBT1         | day4 | 1 |
| mmu-miR-484 | PEG3          | day4 | 1 |
| mmu-miR-485 | LDHC          | day4 | 1 |
| mmu-miR-485 | PYCRL         | day4 | 1 |
| mmu-miR-485 | FXYD2         | day4 | 1 |
| mmu-miR-485 | MAD1L1        | day4 | 1 |
| mmu-miR-485 | BCMO1         | day4 | 1 |
| mmu-miR-485 | TMEM121       | day4 | 1 |
| mmu-miR-485 | ACSBG2        | day4 | 1 |
| mmu-miR-485 | UNC93B1       | day4 | 1 |
| mmu-miR-485 | PKMYT1        | day4 | 1 |
| mmu-miR-485 | ACP5          | day4 | 1 |
| mmu-miR-485 | CD52          | day4 | 1 |

|             |               |      |   |
|-------------|---------------|------|---|
| mmu-miR-485 | E130303B06RIK | day4 | 1 |
| mmu-miR-485 | PRRX2         | day4 | 1 |
| mmu-miR-485 | 2010001M09RIK | day4 | 1 |
| mmu-miR-485 | MYL9          | day4 | 1 |
| mmu-miR-485 | NCAPH         | day4 | 1 |
| mmu-miR-485 | FXN           | day4 | 1 |
| mmu-miR-485 | HLX           | day4 | 1 |
| mmu-miR-485 | COL6A2        | day4 | 1 |
| mmu-miR-485 | CDA           | day4 | 1 |
| mmu-miR-485 | NGFRAP1       | day4 | 1 |
| mmu-miR-485 | NFATC4        | day4 | 1 |
| mmu-miR-485 | ATOH8         | day4 | 1 |
| mmu-miR-485 | FBN2          | day4 | 1 |
| mmu-miR-485 | SULT1E1       | day4 | 1 |
| mmu-miR-485 | 2310067B10RIK | day4 | 1 |
| mmu-miR-485 | ARHGAP9       | day4 | 1 |
| mmu-miR-485 | BC030867      | day4 | 1 |
| mmu-miR-485 | CENPN         | day4 | 1 |
| mmu-miR-485 | 6330439K17RIK | day4 | 1 |
| mmu-miR-485 | CDC25C        | day4 | 1 |
| mmu-miR-485 | RACGAP1       | day4 | 1 |
| mmu-miR-485 | MMP14         | day4 | 1 |
| mmu-miR-485 | E130306D19RIK | day4 | 1 |
| mmu-miR-485 | RGS14         | day4 | 1 |
| mmu-miR-485 | LAMA1         | day4 | 1 |
| mmu-miR-485 | COQ3          | day4 | 1 |
| mmu-miR-485 | 1700011H14RIK | day4 | 1 |
| mmu-miR-485 | WDR67         | day4 | 1 |
| mmu-miR-485 | KRT17         | day4 | 1 |
| mmu-miR-485 | EBF4          | day4 | 1 |
| mmu-miR-485 | CD82          | day4 | 1 |
| mmu-miR-485 | PLCG2         | day4 | 1 |
| mmu-miR-485 | GAS2L2        | day4 | 1 |
| mmu-miR-485 | CAND2         | day4 | 1 |
| mmu-miR-485 | BUB1B         | day4 | 1 |
| mmu-miR-485 | HTR2B         | day4 | 1 |
| mmu-miR-485 | PRSS22        | day4 | 1 |
| mmu-miR-700 | KCNE1L        | day4 | 1 |
| mmu-miR-700 | HIST2H2AA2    | day4 | 1 |
| mmu-miR-700 | NOG           | day4 | 1 |
| mmu-miR-700 | IMPA2         | day4 | 1 |
| mmu-miR-700 | ELF3          | day4 | 1 |
| mmu-miR-700 | CLSTN3        | day4 | 1 |
| mmu-miR-700 | RBM15B        | day4 | 1 |
| mmu-miR-700 | LRDD          | day4 | 1 |
| mmu-miR-700 | UCHL1         | day4 | 1 |

|             |               |      |   |
|-------------|---------------|------|---|
| mmu-miR-700 | RANGAP1       | day4 | 1 |
| mmu-miR-700 | 1700009N14RIK | day4 | 1 |
| mmu-miR-700 | GATA1         | day4 | 1 |
| mmu-miR-700 | LTF           | day4 | 1 |
| mmu-miR-700 | HIRIP3        | day4 | 1 |
| mmu-miR-700 | LSM3          | day4 | 1 |
| mmu-miR-700 | GMPR          | day4 | 1 |
| mmu-miR-700 | TACC3         | day4 | 1 |
| mmu-miR-700 | PODXL2        | day4 | 1 |
| mmu-miR-700 | GM266         | day4 | 1 |
| mmu-miR-700 | SDS           | day4 | 1 |
| mmu-miR-700 | KRT14         | day4 | 1 |
| mmu-miR-700 | PYGO1         | day4 | 1 |
| mmu-miR-700 | ZFPM2         | day4 | 1 |
| mmu-miR-700 | DEGS2         | day4 | 1 |
| mmu-miR-700 | 6030429G01RIK | day4 | 1 |
| mmu-miR-700 | UNC93B1       | day4 | 1 |
| mmu-miR-700 | BRSK1         | day4 | 1 |
| mmu-miR-700 | ESPN          | day4 | 1 |
| mmu-miR-700 | TK1           | day4 | 1 |
| mmu-miR-700 | GJC1          | day4 | 1 |
| mmu-miR-700 | PTK2B         | day4 | 1 |
| mmu-miR-700 | CRMP1         | day4 | 1 |
| mmu-miR-700 | ANKS6         | day4 | 1 |
| mmu-miR-700 | KBTBD5        | day4 | 1 |
| mmu-miR-700 | TLX2          | day4 | 1 |
| mmu-miR-700 | EME1          | day4 | 1 |
| mmu-miR-700 | LRRC43        | day4 | 1 |
| mmu-miR-700 | NUF2          | day4 | 1 |
| mmu-miR-700 | RHD           | day4 | 1 |
| mmu-miR-700 | SAMD14        | day4 | 1 |
| mmu-miR-700 | TNNI1         | day4 | 1 |
| mmu-miR-700 | TNP2          | day4 | 1 |
| mmu-miR-700 | BC034090      | day4 | 1 |
| mmu-miR-700 | 2410022L05RIK | day4 | 1 |
| mmu-miR-700 | TULP1         | day4 | 1 |
| mmu-miR-700 | TRIM54        | day4 | 1 |
| mmu-miR-700 | HIST1H2AH     | day4 | 1 |
| mmu-miR-700 | IGFBP1        | day4 | 1 |
| mmu-miR-700 | PRSS22        | day4 | 1 |
| mmu-miR-700 | CHAF1B        | day4 | 1 |
| mmu-miR-700 | LCE1L         | day4 | 1 |
| mmu-miR-214 | PRC1          | day4 | 1 |
| mmu-miR-214 | SLC45A1       | day4 | 1 |
| mmu-miR-214 | PDLIM3        | day4 | 1 |
| mmu-miR-214 | USP18         | day4 | 1 |

|             |               |      |   |
|-------------|---------------|------|---|
| mmu-miR-214 | METRN         | day4 | 1 |
| mmu-miR-214 | UNC5A         | day4 | 1 |
| mmu-miR-214 | SMARCD1       | day4 | 1 |
| mmu-miR-214 | PSMC3IP       | day4 | 1 |
| mmu-miR-214 | LTF           | day4 | 1 |
| mmu-miR-214 | MASTL         | day4 | 1 |
| mmu-miR-214 | CDCA5         | day4 | 1 |
| mmu-miR-214 | LRRC51        | day4 | 1 |
| mmu-miR-214 | ZFP423        | day4 | 1 |
| mmu-miR-214 | 1190003J15RIK | day4 | 1 |
| mmu-miR-214 | NCF2          | day4 | 1 |
| mmu-miR-214 | CRTAC1        | day4 | 1 |
| mmu-miR-214 | RBL1          | day4 | 1 |
| mmu-miR-214 | TMEM132A      | day4 | 1 |
| mmu-miR-214 | PADI4         | day4 | 1 |
| mmu-miR-214 | 6720463M24RIK | day4 | 1 |
| mmu-miR-214 | NCAPD2        | day4 | 1 |
| mmu-miR-214 | C1QA          | day4 | 1 |
| mmu-miR-214 | ASCL2         | day4 | 1 |
| mmu-miR-214 | PROK2         | day4 | 1 |
| mmu-miR-214 | DDX39         | day4 | 1 |
| mmu-miR-214 | AMIGO3        | day4 | 1 |
| mmu-miR-214 | TNNT1         | day4 | 1 |
| mmu-miR-214 | RHCG          | day4 | 1 |
| mmu-miR-214 | REM1          | day4 | 1 |
| mmu-miR-214 | ROR1          | day4 | 1 |
| mmu-miR-214 | BUB1B         | day4 | 1 |
| mmu-miR-214 | CDCA7L        | day4 | 1 |
| mmu-miR-214 | ADD2          | day4 | 1 |
| mmu-miR-214 | ECEL1         | day4 | 1 |
| mmu-miR-214 | NAGS          | day4 | 1 |
| mmu-miR-214 | 1500015O10RIK | day4 | 1 |
| mmu-miR-214 | TMEM121       | day4 | 1 |
| mmu-miR-214 | TIMP4         | day4 | 1 |
| mmu-miR-214 | NEO1          | day4 | 1 |
| mmu-miR-214 | SLC47A1       | day4 | 1 |
| mmu-miR-214 | ITM2A         | day4 | 1 |
| mmu-miR-214 | ESPN          | day4 | 1 |
| mmu-miR-214 | ALDH3A1       | day4 | 1 |
| mmu-miR-214 | LY6H          | day4 | 1 |
| mmu-miR-214 | COL6A2        | day4 | 1 |
| mmu-miR-214 | NKX2-5        | day4 | 1 |
| mmu-miR-214 | GCHFR         | day4 | 1 |
| mmu-miR-214 | DCTD          | day4 | 1 |
| mmu-miR-214 | GUCA1A        | day4 | 1 |
| mmu-miR-214 | HCLS1         | day4 | 1 |

|                |               |      |   |
|----------------|---------------|------|---|
| mmu-miR-214    | TRIM28        | day4 | 1 |
| mmu-miR-214    | SUV39H1       | day4 | 1 |
| mmu-miR-214    | ILF3          | day4 | 1 |
| mmu-miR-214    | PMF1          | day4 | 1 |
| mmu-miR-214    | FSD1          | day4 | 1 |
| mmu-miR-214    | GAS2L2        | day4 | 1 |
| mmu-miR-214    | IRF1          | day4 | 1 |
| mmu-miR-214    | CMA1          | day4 | 1 |
| mmu-miR-214    | SCARA3        | day4 | 1 |
| mmu-miR-214    | PSAT1         | day4 | 1 |
| mmu-miR-324-5p | STEAP3        | day4 | 1 |
| mmu-miR-324-5p | PRPH          | day4 | 1 |
| mmu-miR-324-5p | AI467606      | day4 | 1 |
| mmu-miR-324-5p | B3GALT5       | day4 | 1 |
| mmu-miR-324-5p | ALOX12E       | day4 | 1 |
| mmu-miR-324-5p | SLC45A1       | day4 | 1 |
| mmu-miR-324-5p | EFNA2         | day4 | 1 |
| mmu-miR-324-5p | SUSD2         | day4 | 1 |
| mmu-miR-324-5p | NELL2         | day4 | 1 |
| mmu-miR-324-5p | SNRPD1        | day4 | 1 |
| mmu-miR-324-5p | CLNK          | day4 | 1 |
| mmu-miR-324-5p | RNF213        | day4 | 1 |
| mmu-miR-324-5p | GLI1          | day4 | 1 |
| mmu-miR-324-5p | 9430015G10RIK | day4 | 1 |
| mmu-miR-324-5p | CCNE1         | day4 | 1 |
| mmu-miR-324-5p | HMHA1         | day4 | 1 |
| mmu-miR-324-5p | GPC2          | day4 | 1 |
| mmu-miR-324-5p | SLC2A5        | day4 | 1 |
| mmu-miR-324-5p | SHD           | day4 | 1 |
| mmu-miR-324-5p | HTRA1         | day4 | 1 |
| mmu-miR-324-5p | DMKN          | day4 | 1 |
| mmu-miR-324-5p | EMID1         | day4 | 1 |
| mmu-miR-324-5p | OASL1         | day4 | 1 |
| mmu-miR-324-5p | IL1B          | day4 | 1 |
| mmu-miR-324-5p | SLMO1         | day4 | 1 |
| mmu-miR-324-5p | NPC1L1        | day4 | 1 |
| mmu-miR-324-5p | LSM2          | day4 | 1 |
| mmu-miR-324-5p | GNG3          | day4 | 1 |
| mmu-miR-324-5p | UNC5C         | day4 | 1 |
| mmu-miR-324-5p | GPC1          | day4 | 1 |
| mmu-miR-324-5p | TWIST2        | day4 | 1 |
| mmu-miR-324-5p | SLC22A1       | day4 | 1 |
| mmu-miR-324-5p | KCNG2         | day4 | 1 |
| mmu-miR-324-5p | F12           | day4 | 1 |
| mmu-miR-324-5p | ICAM1         | day4 | 1 |
| mmu-miR-324-5p | 9930023K05RIK | day4 | 1 |

|                |               |      |   |
|----------------|---------------|------|---|
| mmu-miR-324-5p | SLC22A7       | day4 | 1 |
| mmu-miR-324-5p | PADI4         | day4 | 1 |
| mmu-miR-324-5p | MCM3          | day4 | 1 |
| mmu-miR-324-5p | GMPR          | day4 | 1 |
| mmu-miR-324-5p | GPR179        | day4 | 1 |
| mmu-miR-324-5p | MYCN          | day4 | 1 |
| mmu-miR-324-5p | 1700026L06RIK | day4 | 1 |
| mmu-miR-324-5p | TCFL5         | day4 | 1 |
| mmu-miR-324-5p | C1QL3         | day4 | 1 |
| mmu-miR-324-5p | CLIP3         | day4 | 1 |
| mmu-miR-324-5p | MELK          | day4 | 1 |
| mmu-miR-324-5p | CAR6          | day4 | 1 |
| mmu-miR-324-5p | FXYD4         | day4 | 1 |
| mmu-miR-324-5p | NEK2          | day4 | 1 |
| mmu-miR-324-5p | CD248         | day4 | 1 |
| mmu-miR-324-5p | SMTNL1        | day4 | 1 |
| mmu-miR-324-5p | CAMKV         | day4 | 1 |
| mmu-miR-324-5p | NCAPH         | day4 | 1 |
| mmu-miR-324-5p | SPNB4         | day4 | 1 |
| mmu-miR-324-5p | SPEG          | day4 | 1 |
| mmu-miR-324-5p | AGT           | day4 | 1 |
| mmu-miR-324-5p | TGM1          | day4 | 1 |
| mmu-miR-324-5p | ZAP70         | day4 | 1 |
| mmu-miR-324-5p | LRFN4         | day4 | 1 |
| mmu-miR-324-5p | RNF122        | day4 | 1 |
| mmu-miR-324-5p | ARMCX6        | day4 | 1 |
| mmu-miR-324-5p | MEX3B         | day4 | 1 |
| mmu-miR-324-5p | MYOZ1         | day4 | 1 |
| mmu-miR-324-5p | TNP2          | day4 | 1 |
| mmu-miR-324-5p | TULP1         | day4 | 1 |
| mmu-miR-324-5p | TRIM54        | day4 | 1 |
| mmu-miR-324-5p | PLK1          | day4 | 1 |
| mmu-miR-324-5p | LSM11         | day4 | 1 |
| mmu-miR-342-3p | PRPH          | day4 | 1 |
| mmu-miR-342-3p | GPR84         | day4 | 1 |
| mmu-miR-342-3p | NRTN          | day4 | 1 |
| mmu-miR-342-3p | LRDD          | day4 | 1 |
| mmu-miR-342-3p | AQP3          | day4 | 1 |
| mmu-miR-342-3p | DNAJC9        | day4 | 1 |
| mmu-miR-342-3p | SLMO1         | day4 | 1 |
| mmu-miR-342-3p | RANBP1        | day4 | 1 |
| mmu-miR-342-3p | ASPM          | day4 | 1 |
| mmu-miR-342-3p | PI15          | day4 | 1 |
| mmu-miR-342-3p | LRRC20        | day4 | 1 |
| mmu-miR-342-3p | NUDT1         | day4 | 1 |
| mmu-miR-342-3p | CAR13         | day4 | 1 |

|                |               |      |   |
|----------------|---------------|------|---|
| mmu-miR-342-3p | ALDH5A1       | day4 | 1 |
| mmu-miR-342-3p | LIG1          | day4 | 1 |
| mmu-miR-342-3p | SIX2          | day4 | 1 |
| mmu-miR-342-3p | HMGA2         | day4 | 1 |
| mmu-miR-342-3p | FLNC          | day4 | 1 |
| mmu-miR-342-3p | GMPR          | day4 | 1 |
| mmu-miR-342-3p | MXD3          | day4 | 1 |
| mmu-miR-342-3p | OSM           | day4 | 1 |
| mmu-miR-342-3p | CHRM3         | day4 | 1 |
| mmu-miR-342-3p | ZFYVE28       | day4 | 1 |
| mmu-miR-342-3p | GM1679        | day4 | 1 |
| mmu-miR-342-3p | MFAP2         | day4 | 1 |
| mmu-miR-342-3p | RASD1         | day4 | 1 |
| mmu-miR-342-3p | CCDC19        | day4 | 1 |
| mmu-miR-342-3p | 2310007A19RIK | day4 | 1 |
| mmu-miR-342-3p | BDKRB2        | day4 | 1 |
| mmu-miR-342-3p | ASB16         | day4 | 1 |
| mmu-miR-342-3p | APBB1IP       | day4 | 1 |
| mmu-miR-342-3p | MSX2          | day4 | 1 |
| mmu-miR-342-3p | PPP1R3C       | day4 | 1 |
| mmu-miR-342-3p | COMP          | day4 | 1 |
| mmu-miR-342-3p | ZAP70         | day4 | 1 |
| mmu-miR-342-3p | ADH6A         | day4 | 1 |
| mmu-miR-342-3p | GM1965        | day4 | 1 |
| mmu-miR-342-3p | LGALS1        | day4 | 1 |
| mmu-miR-342-3p | BRCA2         | day4 | 1 |
| mmu-miR-342-3p | SYCE2         | day4 | 1 |
| mmu-miR-342-3p | BFSP2         | day4 | 1 |
| mmu-miR-342-3p | FZD2          | day4 | 1 |
| mmu-miR-342-3p | 2410022L05RIK | day4 | 1 |
| mmu-miR-342-3p | ACSM1         | day4 | 1 |
| mmu-miR-342-3p | PLK1          | day4 | 1 |
| mmu-miR-342-3p | HPCA          | day4 | 1 |
| mmu-miR-342-3p | ADRA1B        | day4 | 1 |
| mmu-miR-342-3p | GAS2L2        | day4 | 1 |
| mmu-miR-342-3p | 5730528L13RIK | day4 | 1 |
| mmu-miR-190b   | RBP4          | day4 | 1 |
| mmu-miR-190b   | PLCXD3        | day4 | 1 |
| mmu-miR-190b   | MAMDC2        | day4 | 1 |
| mmu-miR-190b   | PDIA2         | day4 | 1 |
| mmu-miR-190b   | ENPP2         | day4 | 1 |
| mmu-miR-190b   | CCDC15        | day4 | 1 |
| mmu-miR-190b   | LIX1          | day4 | 1 |
| mmu-miR-190b   | AKAP9         | day4 | 1 |
| mmu-miR-190b   | SKAP1         | day4 | 1 |
| mmu-miR-190b   | PHIP          | day4 | 1 |

|              |               |      |   |
|--------------|---------------|------|---|
| mmu-miR-190b | TDO2          | day4 | 1 |
| mmu-miR-190b | KLRA9         | day4 | 1 |
| mmu-miR-190b | EAR1          | day4 | 1 |
| mmu-miR-190b | GUCY1A2       | day4 | 1 |
| mmu-miR-190b | KCNE2         | day4 | 1 |
| mmu-miR-190b | PDGFD         | day4 | 1 |
| mmu-miR-190b | NR1H4         | day4 | 1 |
| mmu-miR-190b | SPON1         | day4 | 1 |
| mmu-miR-190b | IL6           | day4 | 1 |
| mmu-miR-190b | VSTM2A        | day4 | 1 |
| mmu-miR-190b | CYP3A13       | day4 | 1 |
| mmu-miR-190b | RNASE4        | day4 | 1 |
| mmu-miR-190b | ZMYM6         | day4 | 1 |
| mmu-miR-190b | LMCD1         | day4 | 1 |
| mmu-miR-190b | KIF18A        | day4 | 1 |
| mmu-miR-190b | NLGN1         | day4 | 1 |
| mmu-miR-190b | HERC5         | day4 | 1 |
| mmu-miR-190b | PDZRN4        | day4 | 1 |
| mmu-miR-190b | HGF           | day4 | 1 |
| mmu-miR-190b | A230046K03RIK | day4 | 1 |
| mmu-miR-190b | SLCO1A5       | day4 | 1 |
| mmu-miR-190b | RSBN1         | day4 | 1 |
| mmu-miR-190b | CST7          | day4 | 1 |
| mmu-miR-190b | PDGFRL        | day4 | 1 |
| mmu-miR-190b | PPIC          | day4 | 1 |
| mmu-miR-190b | ITGAD         | day4 | 1 |
| mmu-miR-190b | GADD45B       | day4 | 1 |
| mmu-miR-190b | AGR2          | day4 | 1 |
| mmu-miR-190b | SDCCAG1       | day4 | 1 |
| mmu-miR-190b | LIPF          | day4 | 1 |
| mmu-miR-190b | F2R           | day4 | 1 |
| mmu-miR-669c | GRIK1         | day4 | 1 |
| mmu-miR-669c | POU6F2        | day4 | 1 |
| mmu-miR-669c | IGFBP6        | day4 | 1 |
| mmu-miR-669c | GPR120        | day4 | 1 |
| mmu-miR-669c | 1110028C15RIK | day4 | 1 |
| mmu-miR-669c | MAP3K6        | day4 | 1 |
| mmu-miR-669c | FSIP1         | day4 | 1 |
| mmu-miR-669c | CASP8AP2      | day4 | 1 |
| mmu-miR-669c | PCP4          | day4 | 1 |
| mmu-miR-669c | PRMT8         | day4 | 1 |
| mmu-miR-669c | CXCR6         | day4 | 1 |
| mmu-miR-669c | FBXL13        | day4 | 1 |
| mmu-miR-669c | C130026I21RIK | day4 | 1 |
| mmu-miR-669c | PDGFD         | day4 | 1 |
| mmu-miR-669c | CCRL1         | day4 | 1 |



|              |               |      |   |
|--------------|---------------|------|---|
| mmu-miR-669c | LAIR1         | day4 | 1 |
| mmu-miR-669c | A530054K11RIK | day4 | 1 |
| mmu-miR-669c | GPR171        | day4 | 1 |
| mmu-miR-669c | PTPRR         | day4 | 1 |
| mmu-miR-669c | 4933430I17RIK | day4 | 1 |
| mmu-miR-669c | USHBP1        | day4 | 1 |
| mmu-miR-669c | KLHDC1        | day4 | 1 |
| mmu-miR-669c | CHST4         | day4 | 1 |
| mmu-miR-669c | CYP2E1        | day4 | 1 |
| mmu-miR-669c | TCN2          | day4 | 1 |
| mmu-miR-669c | WFDC8         | day4 | 1 |
| mmu-miR-669c | ANKRD29       | day4 | 1 |
| mmu-miR-669c | DOK3          | day4 | 1 |
| mmu-miR-669c | COLQ          | day4 | 1 |
| mmu-miR-669c | PPEF2         | day4 | 1 |
| mmu-miR-669c | TRIM34        | day4 | 1 |
| mmu-miR-669c | PDGFRL        | day4 | 1 |
| mmu-miR-669c | CNTN1         | day4 | 1 |
| mmu-miR-669c | FCRLA         | day4 | 1 |
| mmu-miR-669c | KLRC1         | day4 | 1 |
| mmu-miR-669c | VIP           | day4 | 1 |
| mmu-miR-669c | CYP1B1        | day4 | 1 |
| mmu-miR-669c | ADAMTSL2      | day4 | 1 |
| mmu-miR-669c | NR3C2         | day4 | 1 |
| mmu-miR-669c | AASS          | day4 | 1 |
| mmu-miR-669c | PAQR3         | day4 | 1 |
| mmu-miR-669c | ABCA6         | day4 | 1 |
| mmu-miR-669c | LY6A          | day4 | 1 |
| mmu-miR-669c | DGKA          | day4 | 1 |
| mmu-miR-669c | PRRG1         | day4 | 1 |
| mmu-miR-669c | CCDC129       | day4 | 1 |
| mmu-miR-669c | EXOC6         | day4 | 1 |
| mmu-miR-669c | NR1H4         | day4 | 1 |
| mmu-miR-669c | SSXB8         | day4 | 1 |
| mmu-miR-669c | CD27          | day4 | 1 |
| mmu-miR-669c | LY6C1         | day4 | 1 |
| mmu-miR-669c | TRPC1         | day4 | 1 |
| mmu-miR-669c | GSTA3         | day4 | 1 |
| mmu-miR-669c | RNASE4        | day4 | 1 |
| mmu-miR-669c | ABCA8A        | day4 | 1 |
| mmu-miR-669c | EFEMP1        | day4 | 1 |
| mmu-miR-669c | CWF19L2       | day4 | 1 |
| mmu-miR-669c | HGF           | day4 | 1 |
| mmu-miR-669c | TRAF3IP1      | day4 | 1 |
| mmu-miR-669c | PLSCR1        | day4 | 1 |
| mmu-miR-669c | OMD           | day4 | 1 |

|              |               |      |   |
|--------------|---------------|------|---|
| mmu-miR-669c | GRTP1         | day4 | 1 |
| mmu-miR-669c | SLAIN1        | day4 | 1 |
| mmu-miR-669c | TRAF3IP3      | day4 | 1 |
| mmu-miR-669c | TSGA10        | day4 | 1 |
| mmu-miR-669c | 2010016I18RIK | day4 | 1 |
| mmu-miR-669c | ITGAD         | day4 | 1 |
| mmu-miR-669c | H2-T23        | day4 | 1 |
| mmu-miR-669c | SERPIND1      | day4 | 1 |
| mmu-miR-32   | IBSP          | day4 | 1 |
| mmu-miR-32   | STK33         | day4 | 1 |
| mmu-miR-32   | IFIH1         | day4 | 1 |
| mmu-miR-32   | INSL5         | day4 | 1 |
| mmu-miR-32   | HSD17B1       | day4 | 1 |
| mmu-miR-32   | RHPN2         | day4 | 1 |
| mmu-miR-32   | ITGAE         | day4 | 1 |
| mmu-miR-32   | NPNT          | day4 | 1 |
| mmu-miR-32   | FXD7          | day4 | 1 |
| mmu-miR-32   | TCF21         | day4 | 1 |
| mmu-miR-32   | GLT25D2       | day4 | 1 |
| mmu-miR-32   | MTMR1         | day4 | 1 |
| mmu-miR-32   | EVI5          | day4 | 1 |
| mmu-miR-32   | CD69          | day4 | 1 |
| mmu-miR-32   | LRRTM3        | day4 | 1 |
| mmu-miR-32   | BCL11B        | day4 | 1 |
| mmu-miR-32   | COL27A1       | day4 | 1 |
| mmu-miR-32   | ODF4          | day4 | 1 |
| mmu-miR-32   | EPST11        | day4 | 1 |
| mmu-miR-32   | RANBP2        | day4 | 1 |
| mmu-miR-32   | PDGFD         | day4 | 1 |
| mmu-miR-32   | DHX58         | day4 | 1 |
| mmu-miR-32   | NOX4          | day4 | 1 |
| mmu-miR-32   | DDC           | day4 | 1 |
| mmu-miR-32   | ACTC1         | day4 | 1 |
| mmu-miR-32   | NXNL2         | day4 | 1 |
| mmu-miR-32   | CYP2D22       | day4 | 1 |
| mmu-miR-32   | MYO1B         | day4 | 1 |
| mmu-miR-32   | EOMES         | day4 | 1 |
| mmu-miR-32   | DMRT2         | day4 | 1 |
| mmu-miR-32   | CTSS          | day4 | 1 |
| mmu-miR-32   | CDO1          | day4 | 1 |
| mmu-miR-32   | RSBN1         | day4 | 1 |
| mmu-miR-32   | PCOLCE2       | day4 | 1 |
| mmu-miR-32   | ELL2          | day4 | 1 |
| mmu-miR-32   | PCF11         | day4 | 1 |
| mmu-miR-32   | DNAHC5        | day4 | 1 |
| mmu-miR-32   | DNAJB9        | day4 | 1 |

|                |               |       |   |
|----------------|---------------|-------|---|
| mmu-miR-32     | KRIT1         | day4  | 1 |
| mmu-miR-32     | GFPT2         | day4  | 1 |
| mmu-miR-32     | ZFP677        | day4  | 1 |
| mmu-miR-32     | KLF2          | day4  | 1 |
| mmu-miR-32     | AGR3          | day4  | 1 |
| mmu-miR-378    | 3110047P20RIK | week1 | 2 |
| mmu-miR-378    | SPP1          | week1 | 2 |
| mmu-miR-378    | CAR5A         | week1 | 2 |
| mmu-miR-378    | GZMB          | week1 | 2 |
| mmu-miR-378    | TRDN          | week1 | 2 |
| mmu-miR-378    | CEP290        | week1 | 2 |
| mmu-miR-378    | NXNL2         | week1 | 2 |
| mmu-miR-378    | ADIPOQ        | week1 | 2 |
| mmu-miR-378    | GRIK1         | week1 | 2 |
| mmu-miR-378    | GRIK4         | week1 | 2 |
| mmu-miR-378    | TPO           | week1 | 2 |
| mmu-miR-378    | KRT33B        | week1 | 2 |
| mmu-miR-378    | COL9A2        | week1 | 2 |
| mmu-miR-378    | CDH4          | week1 | 2 |
| mmu-miR-411*   | VIP           | week1 | 2 |
| mmu-miR-411*   | TBX5          | week1 | 2 |
| mmu-miR-411*   | STYX          | week1 | 2 |
| mmu-miR-411*   | CCDC80        | week1 | 2 |
| mmu-miR-411*   | FABP4         | week1 | 2 |
| mmu-miR-411*   | GLB1L3        | week1 | 2 |
| mmu-miR-188-3p | LEPR          | week1 | 2 |
| mmu-miR-188-3p | TLR1          | week1 | 2 |
| mmu-miR-188-3p | SLC22A14      | week1 | 2 |
| mmu-miR-188-3p | KLRK1         | week1 | 2 |
| mmu-miR-188-3p | KMO           | week1 | 2 |
| mmu-miR-188-3p | CCDC37        | week1 | 2 |
| mmu-miR-188-3p | C15           | week1 | 2 |
| mmu-miR-188-3p | CD74          | week1 | 2 |
| mmu-miR-188-3p | NPDC1         | week1 | 2 |
| mmu-miR-188-3p | KISS1R        | week1 | 2 |
| mmu-miR-188-3p | DOCK2         | week1 | 2 |
| mmu-miR-188-3p | NIPBL         | week1 | 2 |
| mmu-miR-188-3p | SYN2          | week1 | 2 |
| mmu-miR-188-3p | ST3GAL6       | week1 | 2 |
| mmu-miR-188-3p | GUCY1A2       | week1 | 2 |
| mmu-miR-188-3p | ITIH4         | week1 | 2 |
| mmu-miR-188-3p | BCL6          | week1 | 2 |
| mmu-miR-188-3p | ITIH3         | week1 | 2 |
| mmu-miR-188-3p | FBXO24        | week1 | 2 |
| mmu-miR-188-3p | STX11         | week1 | 2 |
| mmu-miR-188-3p | CD27          | week1 | 2 |

|                |               |       |   |
|----------------|---------------|-------|---|
| mmu-miR-188-3p | KLRA2         | week1 | 2 |
| mmu-miR-188-3p | SRPK3         | week1 | 2 |
| mmu-miR-188-3p | TBC1D10C      | week1 | 2 |
| mmu-miR-188-3p | 4921517D21RIK | week1 | 2 |
| mmu-miR-188-3p | NRXN2         | week1 | 2 |
| mmu-miR-188-3p | SCUBE1        | week1 | 2 |
| mmu-miR-188-3p | CMAH          | week1 | 2 |
| mmu-miR-188-3p | DOCK9         | week1 | 2 |
| mmu-miR-188-3p | CIDEA         | week1 | 2 |
| mmu-miR-188-3p | RNF207        | week1 | 2 |
| mmu-miR-188-3p | PCM1          | week1 | 2 |
| mmu-miR-188-3p | CDKL5         | week1 | 2 |
| mmu-miR-188-3p | CYP4B1        | week1 | 2 |
| mmu-miR-188-3p | CTSW          | week1 | 2 |
| mmu-miR-188-3p | ARHGAP30      | week1 | 2 |
| mmu-miR-188-3p | TRAF3IP1      | week1 | 2 |
| mmu-miR-188-3p | PNPLA8        | week1 | 2 |
| mmu-miR-188-3p | CD19          | week1 | 2 |
| mmu-miR-188-3p | KCNT1         | week1 | 2 |
| mmu-miR-188-3p | ATF3          | week1 | 2 |
| mmu-miR-188-3p | DUSP1         | week1 | 2 |
| mmu-miR-188-3p | CST7          | week1 | 2 |
| mmu-miR-188-3p | XIRP2         | week1 | 2 |
| mmu-miR-188-3p | SERPINF2      | week1 | 2 |
| mmu-miR-188-3p | CD79B         | week1 | 2 |
| mmu-miR-188-3p | SLC14A1       | week1 | 2 |
| mmu-miR-341    | FST           | week2 | 3 |
| mmu-miR-341    | 4922501L14RIK | week2 | 3 |
| mmu-miR-341    | BDKRB1        | week2 | 3 |
| mmu-miR-341    | NR1D1         | week2 | 3 |
| mmu-miR-341    | RPRML         | week2 | 3 |
| mmu-miR-341    | WFDC6A        | week2 | 3 |
| mmu-miR-341    | WFDC6B        | week2 | 3 |
| mmu-miR-341    | WFDC1         | week2 | 3 |
| mmu-miR-154*   | ASGR1         | week2 | 3 |
| mmu-miR-154*   | AKR1B7        | week2 | 3 |
| mmu-miR-154*   | 4922501L14RIK | week2 | 3 |
| mmu-miR-154*   | DCLK3         | week2 | 3 |
| mmu-miR-154*   | SLC10A6       | week2 | 3 |
| mmu-miR-29a    | IBSP          | week2 | 3 |
| mmu-miR-29a    | GPR156        | week2 | 3 |
| mmu-miR-29a    | 9930013L23RIK | week2 | 3 |
| mmu-miR-29a    | COL4A1        | week2 | 3 |
| mmu-miR-29a    | MMEL1         | week2 | 3 |
| mmu-miR-29a    | ELN           | week2 | 3 |
| mmu-miR-29a    | CCDC80        | week2 | 3 |

|              |               |       |   |
|--------------|---------------|-------|---|
| mmu-miR-29a  | ARNTL         | week2 | 3 |
| mmu-miR-29a  | 4833422F24RIK | week2 | 3 |
| mmu-miR-29a  | ACCN4         | week2 | 3 |
| mmu-miR-29a  | D0H4S114      | week2 | 3 |
| mmu-miR-29a  | PPIC          | week2 | 3 |
| mmu-miR-29a  | PER3          | week2 | 3 |
| mmu-miR-29b  | IBSP          | week2 | 3 |
| mmu-miR-29b  | GPR156        | week2 | 3 |
| mmu-miR-29b  | 9930013L23RIK | week2 | 3 |
| mmu-miR-29b  | COL4A1        | week2 | 3 |
| mmu-miR-29b  | MMEL1         | week2 | 3 |
| mmu-miR-29b  | ABCB11        | week2 | 3 |
| mmu-miR-29b  | ELN           | week2 | 3 |
| mmu-miR-29b  | CCDC80        | week2 | 3 |
| mmu-miR-29b  | ARNTL         | week2 | 3 |
| mmu-miR-29b  | PAQR3         | week2 | 3 |
| mmu-miR-29b  | 4833422F24RIK | week2 | 3 |
| mmu-miR-29b  | AHSG          | week2 | 3 |
| mmu-miR-29b  | D0H4S114      | week2 | 3 |
| mmu-miR-29b  | ACCN4         | week2 | 3 |
| mmu-miR-29b  | PPIC          | week2 | 3 |
| mmu-miR-29b  | PER3          | week2 | 3 |
| mmu-miR-29b  | ROS1          | week2 | 3 |
| mmu-miR-29c  | IBSP          | week2 | 3 |
| mmu-miR-29c  | GPR156        | week2 | 3 |
| mmu-miR-29c  | 9930013L23RIK | week2 | 3 |
| mmu-miR-29c  | COL4A1        | week2 | 3 |
| mmu-miR-29c  | MMEL1         | week2 | 3 |
| mmu-miR-29c  | ELN           | week2 | 3 |
| mmu-miR-29c  | CCDC80        | week2 | 3 |
| mmu-miR-29c  | POSTN         | week2 | 3 |
| mmu-miR-29c  | ARNTL         | week2 | 3 |
| mmu-miR-29c  | PAQR3         | week2 | 3 |
| mmu-miR-29c  | 4833422F24RIK | week2 | 3 |
| mmu-miR-29c  | AHSG          | week2 | 3 |
| mmu-miR-29c  | D0H4S114      | week2 | 3 |
| mmu-miR-29c  | ACCN4         | week2 | 3 |
| mmu-miR-29c  | PPIC          | week2 | 3 |
| mmu-miR-29c  | PER3          | week2 | 3 |
| mmu-miR-551b | ZFP36         | week2 | 4 |
| mmu-miR-551b | NLRC5         | week2 | 4 |
| mmu-miR-551b | VPREB3        | week2 | 4 |
| mmu-miR-551b | BLK           | week2 | 4 |
| mmu-miR-551b | SLC22A14      | week2 | 4 |
| mmu-miR-551b | CD72          | week2 | 4 |
| mmu-miR-551b | SKAP1         | week2 | 4 |

|                |               |       |   |
|----------------|---------------|-------|---|
| mmu-miR-551b   | AGRP          | week2 | 4 |
| mmu-miR-551b   | H2-Q8         | week2 | 4 |
| mmu-miR-337-3p | LY6D          | week2 | 4 |
| mmu-miR-337-3p | KLB           | week2 | 4 |
| mmu-miR-337-3p | 9530057J20RIK | week2 | 4 |
| mmu-miR-337-3p | SLC16A11      | week2 | 4 |
| mmu-miR-337-3p | OASL2         | week2 | 4 |
| mmu-miR-337-3p | CASC4         | week2 | 4 |
| mmu-miR-337-3p | GGT1          | week2 | 4 |
| mmu-miR-337-3p | MESP1         | week2 | 4 |
| mmu-miR-337-3p | PAPSS2        | week2 | 4 |
| mmu-miR-337-3p | H2-Q8         | week2 | 4 |
| mmu-miR-337-3p | HSH2D         | week2 | 4 |
| mmu-miR-337-3p | PCOLCE2       | week2 | 4 |
| mmu-miR-574-3p | EZH1          | week2 | 4 |
| mmu-miR-574-3p | MAP4K1        | week2 | 4 |
| mmu-miR-574-3p | SLFN5         | week2 | 4 |
| mmu-miR-574-3p | ZFP85-RS1     | week2 | 4 |
| mmu-miR-574-3p | SP110         | week2 | 4 |
| mmu-miR-574-3p | ATP6V1B1      | week2 | 4 |
| mmu-miR-574-3p | GPR88         | week2 | 4 |
| mmu-miR-574-3p | ARHGAP12      | week2 | 4 |
| mmu-miR-574-3p | 2610018G03RIK | week2 | 4 |
| mmu-miR-574-3p | TAP1          | week2 | 4 |
| mmu-miR-574-3p | LRRFIP1       | week2 | 4 |
| mmu-miR-574-3p | PRKAA2        | week2 | 4 |
| mmu-miR-574-3p | DOCK10        | week2 | 4 |
| mmu-miR-574-3p | ENTPD2        | week2 | 4 |
| mmu-miR-574-3p | AATK          | week2 | 4 |
| mmu-miR-574-3p | DEPDC6        | week2 | 4 |
| mmu-miR-574-3p | PHACTR1       | week2 | 4 |
| mmu-miR-574-3p | CRIP3         | week2 | 4 |
| mmu-miR-574-3p | DEFB14        | week2 | 4 |
| mmu-miR-574-3p | SAMHD1        | week2 | 4 |
| mmu-miR-574-3p | HGF           | week2 | 4 |
| mmu-miR-574-3p | SIX4          | week2 | 4 |
| mmu-miR-574-3p | PCM1          | week2 | 4 |
| mmu-miR-574-3p | SAMSN1        | week2 | 4 |
| mmu-miR-574-3p | SP140         | week2 | 4 |
| mmu-miR-574-3p | POR           | week2 | 4 |
| mmu-miR-574-3p | TMEM38B       | week2 | 4 |
| mmu-miR-574-3p | DOK3          | week2 | 4 |
| mmu-miR-574-3p | F5            | week2 | 4 |
| mmu-miR-574-3p | TNNI3K        | week2 | 4 |
| mmu-miR-574-3p | LRMP          | week2 | 4 |
| mmu-miR-878-3p | ENPP5         | week2 | 4 |

|                |               |       |   |
|----------------|---------------|-------|---|
| mmu-miR-878-3p | MEF2C         | week2 | 4 |
| mmu-miR-878-3p | HSD17B11      | week2 | 4 |
| mmu-miR-878-3p | ATP1B1        | week2 | 4 |
| mmu-miR-878-3p | MYBPC2        | week2 | 4 |
| mmu-miR-878-3p | GPBP1         | week2 | 4 |
| mmu-miR-878-3p | CRLF3         | week2 | 4 |
| mmu-miR-878-3p | ACOT4         | week2 | 4 |
| mmu-miR-878-3p | ARHGAP21      | week2 | 4 |
| mmu-miR-878-3p | TDO2          | week2 | 4 |
| mmu-miR-878-3p | HEY1          | week2 | 4 |
| mmu-miR-878-3p | PCP4          | week2 | 4 |
| mmu-miR-878-3p | ACOT11        | week2 | 4 |
| mmu-miR-878-3p | TOP2B         | week2 | 4 |
| mmu-miR-878-3p | GAD1          | week2 | 4 |
| mmu-miR-878-3p | CD27          | week2 | 4 |
| mmu-miR-878-3p | VWA3A         | week2 | 4 |
| mmu-miR-878-3p | AR            | week2 | 4 |
| mmu-miR-878-3p | PIGZ          | week2 | 4 |
| mmu-miR-878-3p | TAOK1         | week2 | 4 |
| mmu-miR-878-3p | TRPM7         | week2 | 4 |
| mmu-miR-878-3p | ZHX1          | week2 | 4 |
| mmu-miR-878-3p | PTPRR         | week2 | 4 |
| mmu-miR-878-3p | CTSS          | week2 | 4 |
| mmu-miR-878-3p | TCN2          | week2 | 4 |
| mmu-miR-878-3p | BIRC3         | week2 | 4 |
| mmu-miR-878-3p | CTSW          | week2 | 4 |
| mmu-miR-878-3p | DNAHC3        | week2 | 4 |
| mmu-miR-878-3p | AMIGO2        | week2 | 4 |
| mmu-miR-878-3p | GBE1          | week2 | 4 |
| mmu-miR-878-3p | CRBN          | week2 | 4 |
| mmu-miR-878-3p | ADCY9         | week2 | 4 |
| mmu-miR-878-3p | SLC7A3        | week2 | 4 |
| mmu-miR-878-3p | FNBP1L        | week2 | 4 |
| mmu-miR-878-3p | 4930485B16RIK | week2 | 4 |
| mmu-miR-878-3p | PLL           | week2 | 4 |
| mmu-miR-155    | ENPP5         | week2 | 4 |
| mmu-miR-155    | SATB1         | week2 | 4 |
| mmu-miR-155    | RNASE4        | week2 | 4 |
| mmu-miR-155    | ZMYM6         | week2 | 4 |
| mmu-miR-155    | D4WSU53E      | week2 | 4 |
| mmu-miR-155    | DOCK9         | week2 | 4 |
| mmu-miR-155    | A930001N09RIK | week2 | 4 |
| mmu-miR-155    | LMBRD1        | week2 | 4 |
| mmu-miR-155    | SSPO          | week2 | 4 |
| mmu-miR-155    | CHPT1         | week2 | 4 |
| mmu-miR-155    | GCC2          | week2 | 4 |

|                |               |       |   |
|----------------|---------------|-------|---|
| mmu-miR-155    | 4931428L18RIK | week2 | 4 |
| mmu-miR-155    | 1700024G13RIK | week2 | 4 |
| mmu-miR-155    | PDE7B         | week2 | 4 |
| mmu-miR-155    | TDO2          | week2 | 4 |
| mmu-miR-155    | CD46          | week2 | 4 |
| mmu-miR-155    | BCAP29        | week2 | 4 |
| mmu-miR-155    | RGS7          | week2 | 4 |
| mmu-miR-155    | RAPGEF4       | week2 | 4 |
| mmu-miR-155    | LRRK2         | week2 | 4 |
| mmu-miR-155    | MGST1         | week2 | 4 |
| mmu-miR-155    | IFNGR1        | week2 | 4 |
| mmu-miR-155    | THOC1         | week2 | 4 |
| mmu-miR-34b-3p | SGPP2         | week2 | 4 |
| mmu-miR-34b-3p | LMO7          | week2 | 4 |
| mmu-miR-34b-3p | ITSN2         | week2 | 4 |
| mmu-miR-34b-3p | VIPR1         | week2 | 4 |
| mmu-miR-34b-3p | BTK           | week2 | 4 |
| mmu-miR-34b-3p | ERO1LB        | week2 | 4 |
| mmu-miR-34b-3p | KISS1R        | week2 | 4 |
| mmu-miR-34b-3p | PLCB4         | week2 | 4 |
| mmu-miR-34b-3p | HEY1          | week2 | 4 |
| mmu-miR-34b-3p | ZFP273        | week2 | 4 |
| mmu-miR-34b-3p | PLTP          | week2 | 4 |
| mmu-miR-34b-3p | SQRDL         | week2 | 4 |
| mmu-miR-34b-3p | TRPM6         | week2 | 4 |
| mmu-miR-34b-3p | PHKG1         | week2 | 4 |
| mmu-miR-34b-3p | KLHDC1        | week2 | 4 |
| mmu-miR-34b-3p | CYB561        | week2 | 4 |
| mmu-miR-34b-3p | DENND1C       | week2 | 4 |
| mmu-miR-34b-3p | IL6RA         | week2 | 4 |
| mmu-miR-34b-3p | CYBB          | week2 | 4 |
| mmu-miR-34b-3p | SLC7A3        | week2 | 4 |
| mmu-miR-34b-3p | AGTR1A        | week2 | 4 |
| mmu-miR-34b-3p | CCR3          | week2 | 4 |
| mmu-miR-34b-3p | PRICKLE2      | week2 | 4 |
| mmu-miR-34b-3p | CRYM          | week2 | 4 |
| mmu-miR-34b-3p | GRB14         | week2 | 4 |
| mmu-miR-34b-3p | F2R           | week2 | 4 |
| mmu-miR-338-5p | KIFC2         | week2 | 4 |
| mmu-miR-338-5p | PDIA2         | week2 | 4 |
| mmu-miR-338-5p | PTPN20        | week2 | 4 |
| mmu-miR-338-5p | PTTG1         | week2 | 4 |
| mmu-miR-338-5p | CAR5B         | week2 | 4 |
| mmu-miR-338-5p | CD2AP         | week2 | 4 |
| mmu-miR-338-5p | KRT23         | week2 | 4 |
| mmu-miR-338-5p | 2310001H12RIK | week2 | 4 |



|                |               |       |   |
|----------------|---------------|-------|---|
| mmu-miR-338-5p | ARHGAP21      | week2 | 4 |
| mmu-miR-338-5p | SFRS18        | week2 | 4 |
| mmu-miR-338-5p | KISS1R        | week2 | 4 |
| mmu-miR-338-5p | PCP4          | week2 | 4 |
| mmu-miR-338-5p | ZFML          | week2 | 4 |
| mmu-miR-338-5p | BC031441      | week2 | 4 |
| mmu-miR-338-5p | ADAM33        | week2 | 4 |
| mmu-miR-338-5p | SPATA1        | week2 | 4 |
| mmu-miR-338-5p | EPSTI1        | week2 | 4 |
| mmu-miR-338-5p | FBXL13        | week2 | 4 |
| mmu-miR-338-5p | DTNA          | week2 | 4 |
| mmu-miR-338-5p | ACTC1         | week2 | 4 |
| mmu-miR-338-5p | MAOB          | week2 | 4 |
| mmu-miR-338-5p | KTN1          | week2 | 4 |
| mmu-miR-338-5p | 4933421E11RIK | week2 | 4 |
| mmu-miR-338-5p | TC2N          | week2 | 4 |
| mmu-miR-338-5p | SAMSN1        | week2 | 4 |
| mmu-miR-338-5p | LAMP3         | week2 | 4 |
| mmu-miR-338-5p | DUSP1         | week2 | 4 |
| mmu-miR-338-5p | RNF19B        | week2 | 4 |
| mmu-miR-338-5p | KLF2          | week2 | 4 |
| mmu-miR-338-5p | MGST1         | week2 | 4 |
| mmu-miR-338-5p | SH3GL2        | week2 | 4 |
| mmu-miR-467e   | ENPP5         | week2 | 4 |
| mmu-miR-467e   | DNAJC5B       | week2 | 4 |
| mmu-miR-467e   | ATP1B1        | week2 | 4 |
| mmu-miR-467e   | AK129341      | week2 | 4 |
| mmu-miR-467e   | TNFRSF25      | week2 | 4 |
| mmu-miR-467e   | HSD17B1       | week2 | 4 |
| mmu-miR-467e   | OLAH          | week2 | 4 |
| mmu-miR-467e   | ZFP68         | week2 | 4 |
| mmu-miR-467e   | RNF186        | week2 | 4 |
| mmu-miR-467e   | ASB11         | week2 | 4 |
| mmu-miR-467e   | RABGAP1L      | week2 | 4 |
| mmu-miR-467e   | DNAHC12       | week2 | 4 |
| mmu-miR-467e   | ANKRD1        | week2 | 4 |
| mmu-miR-467e   | LRRC34        | week2 | 4 |
| mmu-miR-467e   | LRRC4C        | week2 | 4 |
| mmu-miR-467e   | BC005561      | week2 | 4 |
| mmu-miR-467e   | HOOK3         | week2 | 4 |
| mmu-miR-467e   | CAPS2         | week2 | 4 |
| mmu-miR-467e   | TDO2          | week2 | 4 |
| mmu-miR-467e   | CCDC66        | week2 | 4 |
| mmu-miR-467e   | PDGFD         | week2 | 4 |
| mmu-miR-467e   | DOCK10        | week2 | 4 |
| mmu-miR-467e   | SRGN          | week2 | 4 |

|               |               |       |   |
|---------------|---------------|-------|---|
| mmu-miR-467e  | STAG2         | week2 | 4 |
| mmu-miR-467e  | TEC           | week2 | 4 |
| mmu-miR-467e  | C1GALT1C1     | week2 | 4 |
| mmu-miR-467e  | CCPG1         | week2 | 4 |
| mmu-miR-467e  | PIK3C2A       | week2 | 4 |
| mmu-miR-467e  | YIPF7         | week2 | 4 |
| mmu-miR-467e  | MYO1B         | week2 | 4 |
| mmu-miR-467e  | CCDC81        | week2 | 4 |
| mmu-miR-467e  | TNFRSF13C     | week2 | 4 |
| mmu-miR-467e  | DOCK9         | week2 | 4 |
| mmu-miR-467e  | LMBRD1        | week2 | 4 |
| mmu-miR-467e  | TRIM21        | week2 | 4 |
| mmu-miR-467e  | ZFP37         | week2 | 4 |
| mmu-miR-467e  | P2RX5         | week2 | 4 |
| mmu-miR-467e  | DNAHC3        | week2 | 4 |
| mmu-miR-467e  | SERPINB9      | week2 | 4 |
| mmu-miR-467e  | GPR34         | week2 | 4 |
| mmu-miR-467e  | RGS7          | week2 | 4 |
| mmu-miR-467e  | HSPB1         | week2 | 4 |
| mmu-miR-467e  | CP            | week2 | 4 |
| mmu-miR-467e  | WDR69         | week2 | 4 |
| mmu-miR-467e  | LRRK2         | week2 | 4 |
| mmu-miR-467e  | BCAR3         | week2 | 4 |
| mmu-miR-467a* | ZFP54         | week2 | 4 |
| mmu-miR-467a* | GM129         | week2 | 4 |
| mmu-miR-467a* | HERPUD1       | week2 | 4 |
| mmu-miR-467a* | A930001N09RIK | week2 | 4 |
| mmu-miR-467a* | AKAP9         | week2 | 4 |
| mmu-miR-467a* | 4933421E11RIK | week2 | 4 |
| mmu-miR-467a* | ANKRD1        | week2 | 4 |
| mmu-miR-467a* | SERPINB1B     | week2 | 4 |
| mmu-miR-467a* | CCDC68        | week2 | 4 |
| mmu-miR-467a* | CTTNBP2       | week2 | 4 |
| mmu-miR-467a* | PCF11         | week2 | 4 |
| mmu-miR-467a* | TDO2          | week2 | 4 |
| mmu-miR-467a* | RNF19B        | week2 | 4 |
| mmu-miR-467a* | INPP5D        | week2 | 4 |
| mmu-miR-467a* | PDGFD         | week2 | 4 |
| mmu-miR-467a* | LRRK2         | week2 | 4 |
| mmu-miR-467a* | NBEAL1        | week2 | 4 |
| mmu-miR-467e* | ZFP54         | week2 | 4 |
| mmu-miR-467e* | GM129         | week2 | 4 |
| mmu-miR-467e* | HERPUD1       | week2 | 4 |
| mmu-miR-467e* | A930001N09RIK | week2 | 4 |
| mmu-miR-467e* | AKAP9         | week2 | 4 |
| mmu-miR-467e* | 4933421E11RIK | week2 | 4 |

|                |           |       |   |
|----------------|-----------|-------|---|
| mmu-miR-467e*  | ANKRD1    | week2 | 4 |
| mmu-miR-467e*  | SERPINB1B | week2 | 4 |
| mmu-miR-467e*  | CCDC68    | week2 | 4 |
| mmu-miR-467e*  | PCF11     | week2 | 4 |
| mmu-miR-467e*  | CTTNBP2   | week2 | 4 |
| mmu-miR-467e*  | RNF19B    | week2 | 4 |
| mmu-miR-467e*  | INPP5D    | week2 | 4 |
| mmu-miR-467e*  | PDGFD     | week2 | 4 |
| mmu-miR-467e*  | LRRK2     | week2 | 4 |
| mmu-miR-467e*  | NBEAL1    | week2 | 4 |
| mmu-miR-142-5p | LDHC      | week1 | 5 |
| mmu-miR-142-5p | CKAP2     | week1 | 5 |
| mmu-miR-142-5p | CCDC99    | week1 | 5 |
| mmu-miR-142-5p | NELL1     | week1 | 5 |
| mmu-miR-142-5p | OTX2      | week1 | 5 |
| mmu-miR-142-5p | TTK       | week1 | 5 |
| mmu-miR-142-5p | PBK       | week1 | 5 |
| mmu-miR-142-5p | ORC1L     | week1 | 5 |
| mmu-miR-142-5p | NPHP4     | week1 | 5 |
| mmu-miR-142-5p | CCNB2     | week1 | 5 |
| mmu-miR-142-5p | NCAPG     | week1 | 5 |
| mmu-miR-142-5p | LY6F      | week1 | 5 |
| mmu-miR-142-5p | LRRN1     | week1 | 5 |
| mmu-miR-142-5p | CACNA1G   | week1 | 5 |
| mmu-miR-142-5p | TUBE1     | week1 | 5 |
| mmu-miR-142-5p | TUBB6     | week1 | 5 |
| mmu-miR-142-5p | BUB1B     | week1 | 5 |
| mmu-miR-142-5p | AREG      | week1 | 5 |
| mmu-miR-142-5p | MASTL     | week1 | 5 |
| mmu-miR-142-5p | MELK      | week1 | 5 |
| mmu-miR-142-5p | ERCC6L    | week1 | 5 |
| mmu-let-7f*    | KIF22     | week1 | 5 |
| mmu-let-7f*    | HMGB2     | week1 | 5 |
| mmu-let-7f*    | HIST4H4   | week1 | 5 |
| mmu-let-7f*    | OLFML2B   | week1 | 5 |
| mmu-let-7f*    | PLAC1     | week1 | 5 |
| mmu-let-7f*    | NUF2      | week1 | 5 |
| mmu-let-7f*    | NUSAP1    | week1 | 5 |
| mmu-let-7f*    | CASC5     | week1 | 5 |
| mmu-let-7f*    | BRIP1     | week1 | 5 |
| mmu-let-7f*    | GTF2A1L   | week1 | 5 |
| mmu-let-7f*    | ECT2      | week1 | 5 |
| mmu-let-7f*    | CCL11     | week1 | 5 |
| mmu-let-7f*    | POLE2     | week1 | 5 |
| mmu-let-7f*    | NPY       | week1 | 5 |
| mmu-let-7f*    | OLFR664   | week1 | 5 |

|              |               |       |   |
|--------------|---------------|-------|---|
| mmu-let-7f*  | FANCI         | week1 | 5 |
| mmu-let-7f*  | PLK1          | week1 | 5 |
| mmu-let-7f*  | SQLE          | week1 | 5 |
| mmu-let-7f*  | KRT15         | week1 | 5 |
| mmu-let-7f*  | CRH           | week1 | 5 |
| mmu-let-7f*  | SPON2         | week1 | 5 |
| mmu-let-7f*  | UBE2T         | week1 | 5 |
| mmu-let-7f*  | ASPM          | week1 | 5 |
| mmu-miR-101b | MAGEL2        | week1 | 5 |
| mmu-miR-101b | LMNB1         | week1 | 5 |
| mmu-miR-101b | DBC1          | week1 | 5 |
| mmu-miR-101b | SYCE2         | week1 | 5 |
| mmu-miR-101b | TTK           | week1 | 5 |
| mmu-miR-101b | 4833423E24RIK | week1 | 5 |
| mmu-miR-101b | GTF2A1L       | week1 | 5 |
| mmu-miR-101b | MCM3          | week1 | 5 |
| mmu-miR-101b | AQP3          | week1 | 5 |
| mmu-miR-101b | RAD51         | week1 | 5 |
| mmu-miR-101b | MYCN          | week1 | 5 |
| mmu-miR-101b | SPC25         | week1 | 5 |
| mmu-miR-101b | CHRM3         | week1 | 5 |
| mmu-miR-101b | FANCI         | week1 | 5 |
| mmu-miR-101b | SQLE          | week1 | 5 |
| mmu-miR-101b | AGT           | week1 | 5 |
| mmu-miR-101b | RRM1          | week1 | 5 |
| mmu-miR-101b | LRRN1         | week1 | 5 |
| mmu-miR-101b | MNS1          | week1 | 5 |
| mmu-miR-101b | RAD18         | week1 | 5 |
| mmu-miR-101b | HAS2          | week1 | 5 |
| mmu-miR-181c | CKS1B         | week1 | 5 |
| mmu-miR-181c | JPH3          | week1 | 5 |
| mmu-miR-181c | CCDC99        | week1 | 5 |
| mmu-miR-181c | B3GALT5       | week1 | 5 |
| mmu-miR-181c | LMO3          | week1 | 5 |
| mmu-miR-181c | E2F7          | week1 | 5 |
| mmu-miR-181c | TMEM121       | week1 | 5 |
| mmu-miR-181c | 4930547N16RIK | week1 | 5 |
| mmu-miR-181c | TTK           | week1 | 5 |
| mmu-miR-181c | FHL2          | week1 | 5 |
| mmu-miR-181c | AURKB         | week1 | 5 |
| mmu-miR-181c | H19           | week1 | 5 |
| mmu-miR-181c | INCENP        | week1 | 5 |
| mmu-miR-181c | TGFBI         | week1 | 5 |
| mmu-miR-181c | 2310067B10RIK | week1 | 5 |
| mmu-miR-181c | OLFR530       | week1 | 5 |
| mmu-miR-181c | THBS4         | week1 | 5 |

|               |               |       |   |
|---------------|---------------|-------|---|
| mmu-miR-181c  | TRPA1         | week1 | 5 |
| mmu-miR-181c  | CCNF          | week1 | 5 |
| mmu-miR-181c  | SIX2          | week1 | 5 |
| mmu-miR-181c  | RACGAP1       | week1 | 5 |
| mmu-miR-181c  | RAD54L        | week1 | 5 |
| mmu-miR-181c  | 6720463M24RIK | week1 | 5 |
| mmu-miR-181c  | ANKRD22       | week1 | 5 |
| mmu-miR-181c  | ASPHD2        | week1 | 5 |
| mmu-miR-181c  | LRRN1         | week1 | 5 |
| mmu-miR-181c  | WIF1          | week1 | 5 |
| mmu-miR-181c  | EFNA4         | week1 | 5 |
| mmu-miR-181c  | MELK          | week1 | 5 |
| mmu-miR-181c  | 1700049L16RIK | week1 | 5 |
| mmu-miR-302c* | CKAP2         | week1 | 5 |
| mmu-miR-302c* | AIPL1         | week1 | 5 |
| mmu-miR-302c* | MKI67         | week1 | 5 |
| mmu-miR-302c* | 1500015O10RIK | week1 | 5 |
| mmu-miR-302c* | INTS2         | week1 | 5 |
| mmu-miR-302c* | AURKA         | week1 | 5 |
| mmu-miR-302c* | ORC1L         | week1 | 5 |
| mmu-miR-302c* | MXD3          | week1 | 5 |
| mmu-miR-302c* | D14ERTD449E   | week1 | 5 |
| mmu-miR-302c* | WBP2NL        | week1 | 5 |
| mmu-miR-302c* | C1QL1         | week1 | 5 |
| mmu-miR-302c* | STAG3         | week1 | 5 |
| mmu-miR-302c* | PPIL5         | week1 | 5 |
| mmu-miR-302c* | COL11A1       | week1 | 5 |
| mmu-miR-302c* | CCNA2         | week1 | 5 |
| mmu-miR-302c* | TUBB3         | week1 | 5 |
| mmu-miR-224   | CPNE6         | week2 | 6 |
| mmu-miR-224   | WASF1         | week2 | 6 |
| mmu-miR-224   | ARSI          | week2 | 6 |
| mmu-miR-224   | GDF5          | week2 | 6 |
| mmu-miR-224   | CACNB2        | week2 | 6 |
| mmu-miR-224   | RANGAP1       | week2 | 6 |
| mmu-miR-224   | CDH3          | week2 | 6 |
| mmu-miR-224   | DAAM2         | week2 | 6 |
| mmu-miR-224   | HOXD10        | week2 | 6 |
| mmu-miR-224   | GPC4          | week2 | 6 |
| mmu-miR-224   | PYCR1         | week2 | 6 |
| mmu-miR-224   | H2AFY2        | week2 | 6 |
| mmu-miR-224   | PCNA          | week2 | 6 |
| mmu-miR-224   | AP3B2         | week2 | 6 |
| mmu-miR-224   | RGN           | week2 | 6 |
| mmu-miR-224   | CDA           | week2 | 6 |
| mmu-miR-224   | PTX3          | week2 | 6 |

|                |               |       |   |
|----------------|---------------|-------|---|
| mmu-miR-224    | SLITRK5       | week2 | 6 |
| mmu-miR-224    | TWIST2        | week2 | 6 |
| mmu-miR-224    | CAR2          | week2 | 6 |
| mmu-miR-126-3p | MAF           | week2 | 6 |
| mmu-miR-126-3p | CADM3         | week2 | 6 |
| mmu-miR-126-3p | HS3ST5        | week2 | 6 |
| mmu-miR-126-3p | GMNN          | week2 | 6 |
| mmu-miR-126-3p | PNCK          | week2 | 6 |
| mmu-miR-126-3p | THOP1         | week2 | 6 |
| mmu-miR-126-3p | PDXP          | week2 | 6 |
| mmu-miR-126-3p | TCEAL5        | week2 | 6 |
| mmu-miR-126-3p | ILF3          | week2 | 6 |
| mmu-miR-126-3p | TPBG          | week2 | 6 |
| mmu-miR-126-3p | CTNNBIP1      | week2 | 6 |
| mmu-miR-126-3p | CASP3         | week2 | 6 |
| mmu-miR-126-3p | COL14A1       | week2 | 6 |
| mmu-miR-126-3p | MPI           | week2 | 6 |
| mmu-miR-126-3p | 4930404H21RIK | week2 | 6 |
| mmu-miR-126-3p | NTS           | week2 | 6 |
| mmu-miR-126-3p | COL6A2        | week2 | 6 |
| mmu-miR-126-3p | SP5           | week2 | 6 |
| mmu-miR-126-3p | C1QL3         | week2 | 6 |
| mmu-miR-126-3p | TMPO          | week2 | 6 |
| mmu-miR-126-3p | PTX3          | week2 | 6 |
| mmu-let-7i*    | 5530401N12RIK | week2 | 6 |
| mmu-let-7i*    | THOP1         | week2 | 6 |
| mmu-let-7i*    | DTYMK         | week2 | 6 |
| mmu-let-7i*    | PGAM2         | week2 | 6 |
| mmu-let-7i*    | MYBL1         | week2 | 6 |
| mmu-let-7i*    | GPC4          | week2 | 6 |
| mmu-let-7i*    | CDH22         | week2 | 6 |
| mmu-let-7i*    | CRISPLD1      | week2 | 6 |
| mmu-let-7i*    | FXN           | week2 | 6 |
| mmu-let-7i*    | SPEG          | week2 | 6 |
| mmu-let-7i*    | KIRREL        | week2 | 6 |
| mmu-let-7i*    | LSM3          | week2 | 6 |
| mmu-let-7i*    | NGFRAP1       | week2 | 6 |
| mmu-let-7i*    | WDHD1         | week2 | 6 |
| mmu-let-7i*    | CRY1          | week2 | 6 |
| mmu-let-7i*    | THBS1         | week2 | 6 |
| mmu-let-7i*    | CCDC106       | week2 | 6 |
| mmu-let-7i*    | ZFP239        | week2 | 6 |
| mmu-let-7i*    | CDC42EP5      | week2 | 6 |
| mmu-let-7i*    | 2610017I09RIK | week2 | 6 |
| mmu-let-7i*    | SLC8A1        | week2 | 6 |
| mmu-let-7i*    | TTF2          | week2 | 6 |

|             |               |       |   |
|-------------|---------------|-------|---|
| mmu-let-7i* | SUV39H2       | week2 | 6 |
| mmu-let-7i* | PPA1          | week2 | 6 |
| mmu-let-7i* | CDKN1C        | week2 | 6 |
| mmu-let-7i* | SMTN          | week2 | 6 |
| mmu-let-7i* | DNMT1         | week2 | 6 |
| mmu-let-7i* | ZMYND19       | week2 | 6 |
| mmu-let-7i* | PLA2G4C       | week2 | 6 |
| mmu-miR-29a | 1500010J02RIK | week2 | 6 |
| mmu-miR-29a | PLXNA3        | week2 | 6 |
| mmu-miR-29a | BLM           | week2 | 6 |
| mmu-miR-29a | DBF4          | week2 | 6 |
| mmu-miR-29a | TSPAN6        | week2 | 6 |
| mmu-miR-29a | PKMYT1        | week2 | 6 |
| mmu-miR-29a | SLC7A9        | week2 | 6 |
| mmu-miR-29a | CHEK2         | week2 | 6 |
| mmu-miR-29a | TGFB2         | week2 | 6 |
| mmu-miR-29a | NPAS3         | week2 | 6 |
| mmu-miR-29a | CRISPLD1      | week2 | 6 |
| mmu-miR-29a | KIRREL        | week2 | 6 |
| mmu-miR-29a | EMID1         | week2 | 6 |
| mmu-miR-29a | PAFAH1B3      | week2 | 6 |
| mmu-miR-29a | COL6A2        | week2 | 6 |
| mmu-miR-29a | TUBB5         | week2 | 6 |
| mmu-miR-29a | RANBP1        | week2 | 6 |
| mmu-miR-29a | TBC1D7        | week2 | 6 |
| mmu-miR-29a | NFATC4        | week2 | 6 |
| mmu-miR-29a | GPX7          | week2 | 6 |
| mmu-miR-29a | PTX3          | week2 | 6 |
| mmu-miR-29a | GCHFR         | week2 | 6 |
| mmu-miR-29a | CDC7          | week2 | 6 |
| mmu-miR-29a | LRRC3         | week2 | 6 |
| mmu-miR-29a | BMP1          | week2 | 6 |
| mmu-miR-29a | NASP          | week2 | 6 |
| mmu-miR-29a | PNCK          | week2 | 6 |
| mmu-miR-29a | FBN1          | week2 | 6 |
| mmu-miR-29a | COL15A1       | week2 | 6 |
| mmu-miR-29a | TMEM132A      | week2 | 6 |
| mmu-miR-29a | BRCA2         | week2 | 6 |
| mmu-miR-29a | COL16A1       | week2 | 6 |
| mmu-miR-29a | KITL          | week2 | 6 |
| mmu-miR-29a | WDR90         | week2 | 6 |
| mmu-miR-29a | CDK2          | week2 | 6 |
| mmu-miR-29a | CCDC77        | week2 | 6 |
| mmu-miR-29a | BLMH          | week2 | 6 |
| mmu-miR-29a | FREM3         | week2 | 6 |
| mmu-miR-29a | GPR37         | week2 | 6 |

|             |               |       |   |
|-------------|---------------|-------|---|
| mmu-miR-29a | SFPQ          | week2 | 6 |
| mmu-miR-29a | PSORS1C2      | week2 | 6 |
| mmu-miR-29a | TDG           | week2 | 6 |
| mmu-miR-29a | ROR1          | week2 | 6 |
| mmu-miR-29a | FKBP10        | week2 | 6 |
| mmu-miR-29a | 2700094K13RIK | week2 | 6 |
| mmu-miR-29b | 1500010J02RIK | week2 | 6 |
| mmu-miR-29b | PLXNA3        | week2 | 6 |
| mmu-miR-29b | BLM           | week2 | 6 |
| mmu-miR-29b | DBF4          | week2 | 6 |
| mmu-miR-29b | TSPAN6        | week2 | 6 |
| mmu-miR-29b | PKMYT1        | week2 | 6 |
| mmu-miR-29b | SLC7A9        | week2 | 6 |
| mmu-miR-29b | CHEK2         | week2 | 6 |
| mmu-miR-29b | MTHFD1L       | week2 | 6 |
| mmu-miR-29b | NPAS3         | week2 | 6 |
| mmu-miR-29b | CRISPLD1      | week2 | 6 |
| mmu-miR-29b | KIRREL        | week2 | 6 |
| mmu-miR-29b | EMID1         | week2 | 6 |
| mmu-miR-29b | TUBB5         | week2 | 6 |
| mmu-miR-29b | COL6A2        | week2 | 6 |
| mmu-miR-29b | PAFAH1B3      | week2 | 6 |
| mmu-miR-29b | RANBP1        | week2 | 6 |
| mmu-miR-29b | TBC1D7        | week2 | 6 |
| mmu-miR-29b | NFATC4        | week2 | 6 |
| mmu-miR-29b | GPX7          | week2 | 6 |
| mmu-miR-29b | GCHFR         | week2 | 6 |
| mmu-miR-29b | CDC7          | week2 | 6 |
| mmu-miR-29b | BMP1          | week2 | 6 |
| mmu-miR-29b | PNCK          | week2 | 6 |
| mmu-miR-29b | NASP          | week2 | 6 |
| mmu-miR-29b | FBN1          | week2 | 6 |
| mmu-miR-29b | CD276         | week2 | 6 |
| mmu-miR-29b | TMEM132A      | week2 | 6 |
| mmu-miR-29b | COL16A1       | week2 | 6 |
| mmu-miR-29b | KITL          | week2 | 6 |
| mmu-miR-29b | CDK2          | week2 | 6 |
| mmu-miR-29b | CCDC77        | week2 | 6 |
| mmu-miR-29b | BLMH          | week2 | 6 |
| mmu-miR-29b | FREM3         | week2 | 6 |
| mmu-miR-29b | GPR37         | week2 | 6 |
| mmu-miR-29b | SFPQ          | week2 | 6 |
| mmu-miR-29b | PSORS1C2      | week2 | 6 |
| mmu-miR-29b | TDG           | week2 | 6 |
| mmu-miR-29b | ROR1          | week2 | 6 |
| mmu-miR-29b | MFAP2         | week2 | 6 |



|             |               |       |   |
|-------------|---------------|-------|---|
| mmu-miR-29b | FKBP10        | week2 | 6 |
| mmu-miR-29b | 2700094K13RIK | week2 | 6 |
| mmu-miR-29c | 1500010J02RIK | week2 | 6 |
| mmu-miR-29c | PLXNA3        | week2 | 6 |
| mmu-miR-29c | BLM           | week2 | 6 |
| mmu-miR-29c | DBF4          | week2 | 6 |
| mmu-miR-29c | TSPAN6        | week2 | 6 |
| mmu-miR-29c | PKMYT1        | week2 | 6 |
| mmu-miR-29c | SLC7A9        | week2 | 6 |
| mmu-miR-29c | CHEK2         | week2 | 6 |
| mmu-miR-29c | MTHFD1L       | week2 | 6 |
| mmu-miR-29c | TGFB2         | week2 | 6 |
| mmu-miR-29c | NPAS3         | week2 | 6 |
| mmu-miR-29c | CRISPLD1      | week2 | 6 |
| mmu-miR-29c | KIRREL        | week2 | 6 |
| mmu-miR-29c | EMID1         | week2 | 6 |
| mmu-miR-29c | COL6A2        | week2 | 6 |
| mmu-miR-29c | TUBB5         | week2 | 6 |
| mmu-miR-29c | PAFAH1B3      | week2 | 6 |
| mmu-miR-29c | CDA           | week2 | 6 |
| mmu-miR-29c | RANBP1        | week2 | 6 |
| mmu-miR-29c | TBC1D7        | week2 | 6 |
| mmu-miR-29c | NFATC4        | week2 | 6 |
| mmu-miR-29c | GPX7          | week2 | 6 |
| mmu-miR-29c | PTX3          | week2 | 6 |
| mmu-miR-29c | GCHFR         | week2 | 6 |
| mmu-miR-29c | CDC7          | week2 | 6 |
| mmu-miR-29c | BMP1          | week2 | 6 |
| mmu-miR-29c | NASP          | week2 | 6 |
| mmu-miR-29c | PNCK          | week2 | 6 |
| mmu-miR-29c | FBN1          | week2 | 6 |
| mmu-miR-29c | COL15A1       | week2 | 6 |
| mmu-miR-29c | TMEM132A      | week2 | 6 |
| mmu-miR-29c | COL16A1       | week2 | 6 |
| mmu-miR-29c | KITL          | week2 | 6 |
| mmu-miR-29c | CDK2          | week2 | 6 |
| mmu-miR-29c | MMP11         | week2 | 6 |
| mmu-miR-29c | CCDC77        | week2 | 6 |
| mmu-miR-29c | BLMH          | week2 | 6 |
| mmu-miR-29c | FREM3         | week2 | 6 |
| mmu-miR-29c | GPR37         | week2 | 6 |
| mmu-miR-29c | PSORS1C2      | week2 | 6 |
| mmu-miR-29c | TDG           | week2 | 6 |
| mmu-miR-29c | ROR1          | week2 | 6 |
| mmu-miR-29c | FKBP10        | week2 | 6 |
| mmu-miR-29c | 2700094K13RIK | week2 | 6 |

|                |               |       |   |
|----------------|---------------|-------|---|
| mmu-miR-467a   | FGD1          | week2 | 6 |
| mmu-miR-467a   | NDN           | week2 | 6 |
| mmu-miR-467a   | WASF1         | week2 | 6 |
| mmu-miR-467a   | NANOS1        | week2 | 6 |
| mmu-miR-467a   | MED25         | week2 | 6 |
| mmu-miR-467a   | SNRPD1        | week2 | 6 |
| mmu-miR-467a   | CCDC34        | week2 | 6 |
| mmu-miR-467a   | NEO1          | week2 | 6 |
| mmu-miR-467a   | CEP55         | week2 | 6 |
| mmu-miR-467a   | MSX2          | week2 | 6 |
| mmu-miR-467a   | DNAJC9        | week2 | 6 |
| mmu-miR-467a   | TUBB5         | week2 | 6 |
| mmu-miR-467a   | GPSM2         | week2 | 6 |
| mmu-miR-467a   | LMTK3         | week2 | 6 |
| mmu-miR-467a   | FOXD2         | week2 | 6 |
| mmu-miR-467a   | ODC1          | week2 | 6 |
| mmu-miR-467a   | 5930416I19RIK | week2 | 6 |
| mmu-miR-467a   | SUV39H1       | week2 | 6 |
| mmu-miR-467a   | COL15A1       | week2 | 6 |
| mmu-miR-467a   | CHST2         | week2 | 6 |
| mmu-miR-467a   | IGF1          | week2 | 6 |
| mmu-miR-467a   | RNASEH2B      | week2 | 6 |
| mmu-miR-467a   | WDR90         | week2 | 6 |
| mmu-miR-467a   | SUV39H2       | week2 | 6 |
| mmu-miR-467a   | THSD7A        | week2 | 6 |
| mmu-miR-467a   | COQ3          | week2 | 6 |
| mmu-miR-467a   | E330016A19RIK | week2 | 6 |
| mmu-miR-467a   | NTS           | week2 | 6 |
| mmu-miR-467a   | IGF2R         | week2 | 6 |
| mmu-miR-467a   | GNAS          | week2 | 6 |
| mmu-miR-467a   | DIAP3         | week2 | 6 |
| mmu-miR-467a   | DNAJB3        | week2 | 6 |
| mmu-miR-423-5p | PYCRL         | week2 | 6 |
| mmu-miR-423-5p | 1500010J02RIK | week2 | 6 |
| mmu-miR-423-5p | KCNMB4        | week2 | 6 |
| mmu-miR-423-5p | LZTS1         | week2 | 6 |
| mmu-miR-423-5p | ASB16         | week2 | 6 |
| mmu-miR-423-5p | NRADD         | week2 | 6 |
| mmu-miR-423-5p | ZFP580        | week2 | 6 |
| mmu-miR-423-5p | APLP1         | week2 | 6 |
| mmu-miR-423-5p | METR1         | week2 | 6 |
| mmu-miR-423-5p | SPEG          | week2 | 6 |
| mmu-miR-423-5p | ADH1          | week2 | 6 |
| mmu-miR-423-5p | TUBB5         | week2 | 6 |
| mmu-miR-423-5p | AP3B2         | week2 | 6 |
| mmu-miR-423-5p | UCK2          | week2 | 6 |

|                |               |       |   |
|----------------|---------------|-------|---|
| mmu-miR-423-5p | ACADS         | week2 | 6 |
| mmu-miR-423-5p | CRTAP         | week2 | 6 |
| mmu-miR-423-5p | CHST5         | week2 | 6 |
| mmu-miR-423-5p | TAF6L         | week2 | 6 |
| mmu-miR-423-5p | TRERF1        | week2 | 6 |
| mmu-miR-423-5p | CDC25B        | week2 | 6 |
| mmu-miR-423-5p | MMP11         | week2 | 6 |
| mmu-miR-423-5p | TULP1         | week2 | 6 |
| mmu-miR-423-5p | PFDN1         | week2 | 6 |
| mmu-miR-423-5p | KIF1A         | week2 | 6 |
| mmu-miR-423-5p | PODXL2        | week2 | 6 |
| mmu-miR-423-5p | SMYD5         | week2 | 6 |
| mmu-miR-423-5p | MFAP2         | week2 | 6 |
| mmu-miR-451    | CTHRC1        | week2 | 6 |
| mmu-miR-451    | SLC38A4       | week2 | 6 |
| mmu-miR-451    | WASF1         | week2 | 6 |
| mmu-miR-451    | ILF3          | week2 | 6 |
| mmu-miR-451    | NID2          | week2 | 6 |
| mmu-miR-451    | SHF           | week2 | 6 |
| mmu-miR-451    | TMEM26        | week2 | 6 |
| mmu-miR-451    | CDKN1C        | week2 | 6 |
| mmu-miR-451    | MTHFD2        | week2 | 6 |
| mmu-miR-451    | MPHOSPH9      | week2 | 6 |
| mmu-miR-451    | CRISPLD1      | week2 | 6 |
| mmu-miR-451    | ANK2          | week2 | 6 |
| mmu-miR-451    | GPR37         | week2 | 6 |
| mmu-miR-451    | ROR1          | week2 | 6 |
| mmu-miR-451    | MBOAT2        | week2 | 6 |
| mmu-miR-451    | NPM3          | week2 | 6 |
| mmu-miR-451    | AUTS2         | week2 | 6 |
| mmu-miR-451    | 2700094K13RIK | week2 | 6 |
| mmu-miR-451    | MYC           | week2 | 6 |
| mmu-miR-451    | CASQ1         | week2 | 6 |
| mmu-miR-451    | GFRA2         | week2 | 6 |
| mmu-miR-345-5p | 6330439K17RIK | week2 | 6 |
| mmu-miR-345-5p | CADM4         | week2 | 6 |
| mmu-miR-345-5p | SIT1          | week2 | 6 |
| mmu-miR-345-5p | SLAMF9        | week2 | 6 |
| mmu-miR-345-5p | WDFY4         | week2 | 6 |
| mmu-miR-345-5p | TNFSF14       | week2 | 6 |
| mmu-miR-345-5p | TRIM72        | week2 | 6 |
| mmu-miR-345-5p | SERPINA3K     | week2 | 6 |
| mmu-miR-345-5p | RASSF4        | week2 | 6 |
| mmu-miR-345-5p | ACSM1         | week2 | 6 |
| mmu-miR-345-5p | DHRS3         | week2 | 6 |
| mmu-miR-345-5p | NR1I2         | week2 | 6 |

|                 |               |       |   |
|-----------------|---------------|-------|---|
| mmu-miR-345-5p  | OIT1          | week2 | 6 |
| mmu-miR-345-5p  | B3GNT4        | week2 | 6 |
| mmu-miR-345-5p  | BNC1          | week2 | 6 |
| mmu-miR-345-5p  | BCL3          | week2 | 6 |
| mmu-miR-345-5p  | E230008N13RIK | week2 | 6 |
| mmu-miR-345-5p  | ALOX5         | week2 | 6 |
| mmu-miR-345-5p  | RASD1         | week2 | 6 |
| mmu-miR-345-5p  | PTAFR         | week2 | 6 |
| mmu-miR-199a-3p | PTPN6         | week2 | 6 |
| mmu-miR-199a-3p | SIT1          | week2 | 6 |
| mmu-miR-199a-3p | GCLC          | week2 | 6 |
| mmu-miR-199a-3p | HIST1H2BE     | week2 | 6 |
| mmu-miR-199a-3p | TTC25         | week2 | 6 |
| mmu-miR-199a-3p | 9930023K05RIK | week2 | 6 |
| mmu-miR-199a-3p | ALOX12E       | week2 | 6 |
| mmu-miR-199a-3p | TNFSF14       | week2 | 6 |
| mmu-miR-199a-3p | KIF9          | week2 | 6 |
| mmu-miR-199a-3p | RRAGB         | week2 | 6 |
| mmu-miR-199a-3p | ESPN          | week2 | 6 |
| mmu-miR-199a-3p | ARHGAP4       | week2 | 6 |
| mmu-miR-199a-3p | PTK2B         | week2 | 6 |
| mmu-miR-199a-3p | RASL10A       | week2 | 6 |
| mmu-miR-199a-3p | BCL3          | week2 | 6 |
| mmu-miR-199a-3p | PLCD4         | week2 | 6 |
| mmu-miR-199a-3p | QPRT          | week2 | 6 |
| mmu-miR-199a-3p | SUSD3         | week2 | 6 |
| mmu-miR-199a-3p | JAK3          | week2 | 6 |
| mmu-miR-199a-3p | MTMR7         | week2 | 6 |
| mmu-miR-127     | PPP1R14D      | week2 | 6 |
| mmu-miR-127     | TTC25         | week2 | 6 |
| mmu-miR-127     | NFKBIE        | week2 | 6 |
| mmu-miR-127     | FBXO2         | week2 | 6 |
| mmu-miR-127     | ITGB2         | week2 | 6 |
| mmu-miR-127     | CLNK          | week2 | 6 |
| mmu-miR-127     | RGS14         | week2 | 6 |
| mmu-miR-127     | MARCO         | week2 | 6 |
| mmu-miR-127     | A530016L24RIK | week2 | 6 |
| mmu-miR-127     | TRIM54        | week2 | 6 |
| mmu-miR-127     | BCL3          | week2 | 6 |
| mmu-miR-127     | JAK3          | week2 | 6 |
| mmu-miR-127     | HTR2B         | week2 | 6 |
| mmu-miR-127     | RASA4         | week2 | 6 |
| mmu-miR-127     | LIPE          | week2 | 6 |
| mmu-miR-184     | SNCG          | week6 | 7 |
| mmu-miR-184     | OLIG3         | week6 | 7 |
| mmu-miR-184     | TNFRSF17      | week6 | 7 |

|                 |               |       |   |
|-----------------|---------------|-------|---|
| mmu-miR-184     | MOSC1         | week6 | 7 |
| mmu-miR-380-3p  | SLCO4A1       | week6 | 7 |
| mmu-miR-380-3p  | MYL1          | week6 | 7 |
| mmu-miR-380-3p  | OAS1A         | week6 | 7 |
| mmu-miR-192     | CKAP2         | week2 | 8 |
| mmu-miR-192     | CCDC99        | week2 | 8 |
| mmu-miR-192     | NSL1          | week2 | 8 |
| mmu-miR-192     | RRM1          | week2 | 8 |
| mmu-miR-192     | IQGAP3        | week2 | 8 |
| mmu-miR-192     | CASC5         | week2 | 8 |
| mmu-miR-192     | LOXL2         | week2 | 8 |
| mmu-miR-192     | E130306D19RIK | week2 | 8 |
| mmu-miR-466d-3p | KIF23         | week2 | 8 |
| mmu-miR-466d-3p | KIFC1         | week2 | 8 |
| mmu-miR-466d-3p | LMNB1         | week2 | 8 |
| mmu-miR-466d-3p | SCML2         | week2 | 8 |
| mmu-miR-466d-3p | AURKA         | week2 | 8 |
| mmu-miR-466d-3p | PRRX2         | week2 | 8 |
| mmu-miR-466d-3p | AURKB         | week2 | 8 |
| mmu-miR-466d-3p | RNF182        | week2 | 8 |
| mmu-miR-466d-3p | GLI3          | week2 | 8 |
| mmu-miR-466d-3p | TRIM67        | week2 | 8 |
| mmu-miR-466d-3p | POLE2         | week2 | 8 |
| mmu-miR-466d-3p | BUB1          | week2 | 8 |
| mmu-miR-466d-3p | DEPDC1A       | week2 | 8 |
| mmu-miR-466d-3p | COL11A1       | week2 | 8 |
| mmu-miR-466d-3p | ASPM          | week2 | 8 |
| mmu-miR-466d-3p | MAGEL2        | week2 | 8 |
| mmu-miR-466d-3p | OLFML2B       | week2 | 8 |
| mmu-miR-466d-3p | EME1          | week2 | 8 |
| mmu-miR-466d-3p | TPX2          | week2 | 8 |
| mmu-miR-466d-3p | BIRC5         | week2 | 8 |
| mmu-miR-466d-3p | CDC20         | week2 | 8 |
| mmu-miR-466d-3p | MCM3          | week2 | 8 |
| mmu-miR-466d-3p | ORC1L         | week2 | 8 |
| mmu-miR-466d-3p | CENPI         | week2 | 8 |
| mmu-miR-466d-3p | NME4          | week2 | 8 |
| mmu-miR-466d-3p | CCNB2         | week2 | 8 |
| mmu-miR-466d-3p | 6230409E13RIK | week2 | 8 |
| mmu-miR-466d-3p | CACNA1G       | week2 | 8 |
| mmu-miR-466d-3p | WIF1          | week2 | 8 |
| mmu-miR-466d-3p | UBE2T         | week2 | 8 |
| mmu-miR-466a-3p | KIF23         | week2 | 8 |
| mmu-miR-466a-3p | KIFC1         | week2 | 8 |
| mmu-miR-466a-3p | LMNB1         | week2 | 8 |
| mmu-miR-466a-3p | SCML2         | week2 | 8 |

|                 |               |       |   |
|-----------------|---------------|-------|---|
| mmu-miR-466a-3p | AURKA         | week2 | 8 |
| mmu-miR-466a-3p | PRRX2         | week2 | 8 |
| mmu-miR-466a-3p | AURKB         | week2 | 8 |
| mmu-miR-466a-3p | RNF182        | week2 | 8 |
| mmu-miR-466a-3p | GLI3          | week2 | 8 |
| mmu-miR-466a-3p | CCNE1         | week2 | 8 |
| mmu-miR-466a-3p | POLE2         | week2 | 8 |
| mmu-miR-466a-3p | BUB1          | week2 | 8 |
| mmu-miR-466a-3p | DEPDC1A       | week2 | 8 |
| mmu-miR-466a-3p | ASF1B         | week2 | 8 |
| mmu-miR-466a-3p | COL11A1       | week2 | 8 |
| mmu-miR-466a-3p | ASPM          | week2 | 8 |
| mmu-miR-466a-3p | MAGEL2        | week2 | 8 |
| mmu-miR-466a-3p | OLFML2B       | week2 | 8 |
| mmu-miR-466a-3p | EME1          | week2 | 8 |
| mmu-miR-466a-3p | TPX2          | week2 | 8 |
| mmu-miR-466a-3p | BIRC5         | week2 | 8 |
| mmu-miR-466a-3p | CDC20         | week2 | 8 |
| mmu-miR-466a-3p | MCM3          | week2 | 8 |
| mmu-miR-466a-3p | ORC1L         | week2 | 8 |
| mmu-miR-466a-3p | CENPI         | week2 | 8 |
| mmu-miR-466a-3p | CCNB2         | week2 | 8 |
| mmu-miR-466a-3p | CACNA1G       | week2 | 8 |
| mmu-miR-466a-3p | WIF1          | week2 | 8 |
| mmu-miR-466a-3p | UBE2T         | week2 | 8 |
| mmu-miR-467c    | STIL          | week2 | 8 |
| mmu-miR-467c    | CENPN         | week2 | 8 |
| mmu-miR-467c    | HIST4H4       | week2 | 8 |
| mmu-miR-467c    | CCDC99        | week2 | 8 |
| mmu-miR-467c    | SOX3          | week2 | 8 |
| mmu-miR-467c    | KEL           | week2 | 8 |
| mmu-miR-467c    | EME1          | week2 | 8 |
| mmu-miR-467c    | 1500015O10RIK | week2 | 8 |
| mmu-miR-467c    | CENPF         | week2 | 8 |
| mmu-miR-467c    | APCDD1        | week2 | 8 |
| mmu-miR-467c    | CENPI         | week2 | 8 |
| mmu-miR-467c    | CDT1          | week2 | 8 |
| mmu-miR-467c    | CENPH         | week2 | 8 |
| mmu-miR-467c    | NME4          | week2 | 8 |
| mmu-miR-467c    | WBP2NL        | week2 | 8 |
| mmu-miR-467c    | HTRA1         | week2 | 8 |
| mmu-miR-467c    | SPAG4         | week2 | 8 |
| mmu-miR-467c    | MASTL         | week2 | 8 |
| mmu-miR-467c    | POLQ          | week2 | 8 |
| mmu-miR-467c    | UBE2T         | week2 | 8 |
| mmu-miR-467c    | ASPM          | week2 | 8 |

|              |               |       |   |
|--------------|---------------|-------|---|
| mmu-miR-467c | SHCBP1        | week2 | 8 |
| mmu-miR-23b  | MARCKSL1      | week2 | 8 |
| mmu-miR-23b  | ZFP428        | week2 | 8 |
| mmu-miR-23b  | SKP2          | week2 | 8 |
| mmu-miR-23b  | SYCE2         | week2 | 8 |
| mmu-miR-23b  | 4833423E24RIK | week2 | 8 |
| mmu-miR-23b  | ESPL1         | week2 | 8 |
| mmu-miR-23b  | GTSE1         | week2 | 8 |
| mmu-miR-23b  | 6720463M24RIK | week2 | 8 |
| mmu-miR-23b  | CENPH         | week2 | 8 |
| mmu-miR-23b  | WBP2NL        | week2 | 8 |
| mmu-miR-23b  | FREM1         | week2 | 8 |
| mmu-miR-23b  | NPPC          | week2 | 8 |
| mmu-miR-23b  | FBXO5         | week2 | 8 |
| mmu-miR-23b  | SLC27A6       | week2 | 8 |
| mmu-miR-23b  | H2AFX         | week2 | 8 |
| mmu-miR-23b  | UBE2T         | week2 | 8 |
| mmu-miR-467e | HIST4H4       | week2 | 8 |
| mmu-miR-467e | CCDC99        | week2 | 8 |
| mmu-miR-467e | NELL1         | week2 | 8 |
| mmu-miR-467e | CENPF         | week2 | 8 |
| mmu-miR-467e | PBK           | week2 | 8 |
| mmu-miR-467e | GTSE1         | week2 | 8 |
| mmu-miR-467e | ORC1L         | week2 | 8 |
| mmu-miR-467e | NME4          | week2 | 8 |
| mmu-miR-467e | WBP2NL        | week2 | 8 |
| mmu-miR-467e | CCNB2         | week2 | 8 |
| mmu-miR-467e | HTRA1         | week2 | 8 |
| mmu-miR-467e | SPAG4         | week2 | 8 |
| mmu-miR-467e | NSL1          | week2 | 8 |
| mmu-miR-467e | BUB1          | week2 | 8 |
| mmu-miR-467e | BUB1B         | week2 | 8 |
| mmu-miR-467e | DEPDC1A       | week2 | 8 |
| mmu-miR-467e | ASPM          | week2 | 8 |
| mmu-miR-467e | TRIP13        | week2 | 8 |
| mmu-miR-22   | KCNE1L        | week2 | 8 |
| mmu-miR-22   | PRC1          | week2 | 8 |
| mmu-miR-22   | LGALS1        | week2 | 8 |
| mmu-miR-22   | PCDH20        | week2 | 8 |
| mmu-miR-22   | PASK          | week2 | 8 |
| mmu-miR-22   | NTNG1         | week2 | 8 |
| mmu-miR-22   | 4833423E24RIK | week2 | 8 |
| mmu-miR-22   | APCDD1        | week2 | 8 |
| mmu-miR-22   | E130306D19RIK | week2 | 8 |
| mmu-miR-22   | RFC5          | week2 | 8 |
| mmu-miR-22   | UHRF1         | week2 | 8 |

|             |               |       |   |
|-------------|---------------|-------|---|
| mmu-miR-22  | CDCA7         | week2 | 8 |
| mmu-miR-22  | WBP2NL        | week2 | 8 |
| mmu-miR-22  | FBLN2         | week2 | 8 |
| mmu-miR-22  | F630043A04RIK | week2 | 8 |
| mmu-miR-22  | VSTM2L        | week2 | 8 |
| mmu-miR-22  | KRT4          | week2 | 8 |
| mmu-miR-22  | EFNA4         | week2 | 8 |
| mmu-miR-30a | NEIL3         | week2 | 8 |
| mmu-miR-30a | CCNF          | week2 | 8 |
| mmu-miR-30a | KNTC1         | week2 | 8 |
| mmu-miR-30a | TMEM121       | week2 | 8 |
| mmu-miR-30a | ZCWPW1        | week2 | 8 |
| mmu-miR-30a | COL25A1       | week2 | 8 |
| mmu-miR-30a | UPK3A         | week2 | 8 |
| mmu-miR-30a | CENPK         | week2 | 8 |
| mmu-miR-30a | RAD54L        | week2 | 8 |
| mmu-miR-30a | MAD2L1        | week2 | 8 |
| mmu-miR-30a | FANCD2        | week2 | 8 |
| mmu-miR-30a | STAG3         | week2 | 8 |
| mmu-miR-30a | SLC27A6       | week2 | 8 |
| mmu-miR-30a | UBE2T         | week2 | 8 |
| mmu-miR-30d | HIST4H4       | week2 | 8 |
| mmu-miR-30d | NEIL3         | week2 | 8 |
| mmu-miR-30d | CCNF          | week2 | 8 |
| mmu-miR-30d | KNTC1         | week2 | 8 |
| mmu-miR-30d | TMEM121       | week2 | 8 |
| mmu-miR-30d | ZCWPW1        | week2 | 8 |
| mmu-miR-30d | BC055324      | week2 | 8 |
| mmu-miR-30d | UPK3A         | week2 | 8 |
| mmu-miR-30d | CENPK         | week2 | 8 |
| mmu-miR-30d | RAD54L        | week2 | 8 |
| mmu-miR-30d | 6720463M24RIK | week2 | 8 |
| mmu-miR-30d | SPC24         | week2 | 8 |
| mmu-miR-30d | RFC3          | week2 | 8 |
| mmu-miR-30d | MAD2L1        | week2 | 8 |
| mmu-miR-30d | HTRA1         | week2 | 8 |
| mmu-miR-30d | FANCD2        | week2 | 8 |
| mmu-miR-30d | CKAP2L        | week2 | 8 |
| mmu-miR-30d | SLC27A6       | week2 | 8 |
| mmu-miR-30d | UBE2T         | week2 | 8 |
| mmu-miR-714 | GUCA1A        | week2 | 8 |
| mmu-miR-714 | PRPH          | week2 | 8 |
| mmu-miR-714 | STMN3         | week2 | 8 |
| mmu-miR-714 | FA2H          | week2 | 8 |
| mmu-miR-714 | SLC6A13       | week2 | 8 |
| mmu-miR-714 | TRPA1         | week2 | 8 |



|                 |               |       |   |
|-----------------|---------------|-------|---|
| mmu-miR-714     | CHRM3         | week2 | 8 |
| mmu-miR-714     | CD177         | week2 | 8 |
| mmu-miR-714     | C1QL1         | week2 | 8 |
| mmu-miR-714     | SCARA3        | week2 | 8 |
| mmu-miR-714     | PRIMA1        | week2 | 8 |
| mmu-miR-714     | NKX2-5        | week2 | 8 |
| mmu-miR-714     | CAR6          | week2 | 8 |
| mmu-miR-431     | COL9A1        | week2 | 8 |
| mmu-miR-431     | CCK           | week2 | 8 |
| mmu-miR-431     | EEF1A2        | week2 | 8 |
| mmu-miR-431     | MNS1          | week2 | 8 |
| mmu-miR-431     | TLX2          | week2 | 8 |
| mmu-miR-431     | AGXT          | week2 | 8 |
| mmu-miR-431     | 4930415O20RIK | week2 | 8 |
| mmu-miR-337-3p  | RPP25         | week2 | 8 |
| mmu-miR-337-3p  | AIPL1         | week2 | 8 |
| mmu-miR-337-3p  | NPHP4         | week2 | 8 |
| mmu-miR-337-3p  | MRAP          | week2 | 8 |
| mmu-miR-337-3p  | TIMP4         | week2 | 8 |
| mmu-miR-337-3p  | AGXT          | week2 | 8 |
| mmu-miR-337-3p  | AQP3          | week2 | 8 |
| mmu-miR-337-3p  | SLC22A1       | week2 | 8 |
| mmu-miR-125a-5p | LCN2          | week2 | 8 |
| mmu-miR-125a-5p | CCDC109A      | week2 | 8 |
| mmu-miR-125a-5p | TNF           | week2 | 8 |
| mmu-miR-125a-5p | NEPN          | week2 | 8 |
| mmu-miR-125a-5p | RHCG          | week2 | 8 |
| mmu-miR-125a-5p | SCN2B         | week2 | 8 |
| mmu-miR-125a-5p | MRAP          | week2 | 8 |
| mmu-miR-125a-5p | GALNT5        | week2 | 8 |
| mmu-miR-125a-5p | ACTN3         | week2 | 8 |
| mmu-miR-125a-5p | FXYD6         | week2 | 8 |
| mmu-miR-125a-5p | AQP3          | week2 | 8 |
| mmu-miR-337-5p  | CCDC109A      | week2 | 8 |
| mmu-miR-337-5p  | IL17B         | week2 | 8 |
| mmu-miR-337-5p  | MRAP          | week2 | 8 |
| mmu-miR-337-5p  | SLC22A7       | week2 | 8 |
| mmu-miR-337-5p  | TIMP4         | week2 | 8 |
| mmu-miR-337-5p  | CFI           | week2 | 8 |
| mmu-miR-337-5p  | GMPR          | week2 | 8 |
| mmu-miR-337-5p  | EMILIN2       | week2 | 8 |
| mmu-miR-337-5p  | AGXT          | week2 | 8 |
| mmu-miR-337-5p  | AQP3          | week2 | 8 |

**Dataset S2:** Complete Results of GO enrichment analysis using the Ontologizer software for TOP300 ranked genes by 4 different approaches. Using mirDREM with A) miRanda and B) TargetScan miRNA-gene interaction datasets, or C) without anticorrelation constraints and D) using GenMiR++ with miRanda interactions. Listed are the GO ID, the number of genes within the population and study sets as computed by Ontologizer (Pop.term,Study.total,Study.term,Pop.family,Study.family), the enrichment p-value before and after multiple testing correction (p,p.adjusted) and the GO term name.

**A) mirDREM (miRanda) Top 300 GO enrichment**

| ID         | Pop.term | Study.total | Study.term | Pop.family | Study.family | p           | p.adjusted  | GOterm                                                             |
|------------|----------|-------------|------------|------------|--------------|-------------|-------------|--------------------------------------------------------------------|
| GO:0002376 | 1023     | 296         | 48         | 14761      | 290          | 1.36E-08    | 2.38E-05    | immune system process                                              |
| GO:0048534 | 441      | 296         | 28         | 1796       | 43           | 1.41E-08    | 2.38E-05    | hematopoietic or lymphoid organ development                        |
| GO:0019222 | 3596     | 296         | 105        | 9683       | 193          | 6.28E-07    | 0.000707202 | regulation of metabolic process                                    |
| GO:0002520 | 464      | 296         | 28         | 2821       | 72           | 3.15E-06    | 0.002186906 | immune system development                                          |
| GO:0002521 | 270      | 296         | 20         | 1996       | 51           | 3.23E-06    | 0.002186906 | leukocyte differentiation                                          |
| GO:0031323 | 3125     | 296         | 92         | 8937       | 182          | 9.40E-06    | 0.005295652 | regulation of cellular metabolic process                           |
| GO:0002682 | 530      | 296         | 27         | 6977       | 152          | 2.40E-05    | 0.011594727 | regulation of immune system process                                |
| GO:0035556 | 1381     | 296         | 39         | 3581       | 62           | 7.91E-05    | 0.033439068 | intracellular signal transduction                                  |
| GO:0001775 | 476      | 296         | 23         | 10356      | 210          | 9.62E-05    | 0.036129902 | cell activation                                                    |
| GO:0006955 | 508      | 296         | 23         | 5325       | 106          | 0.000119839 | 0.040517672 | immune response                                                    |
| GO:0002764 | 114      | 296         | 9          | 3668       | 65           | 0.000146214 | 0.044940821 | immune response-regulating signaling pathway                       |
| GO:0002768 | 74       | 296         | 6          | 2387       | 29           | 0.000195143 | 0.04712712  | immune response-regulating cell surface receptor signaling pathway |
| GO:0008641 | 6        | 296         | 3          | 4196       | 91           | 0.000188302 | 0.04712712  | small protein activating enzyme activity                           |
| GO:0042101 | 6        | 296         | 3          | 1296       | 29           | 0.000192908 | 0.04712712  | T cell receptor complex                                            |

**B) mirDREM (TargetScan) Top 300 GO enrichment**

| <b>ID</b>  | <b>Pop.term</b> | <b>Study.total</b> | <b>Study.term</b> | <b>Pop.family</b> | <b>Study.family</b> | <b>p</b> | <b>p.adjusted</b> | <b>GO term name</b>                       |
|------------|-----------------|--------------------|-------------------|-------------------|---------------------|----------|-------------------|-------------------------------------------|
| GO:0002376 | 1024            | 290                | 51                | 14777             | 281                 | 1.73E-10 | 6.43E-07          | immune system process                     |
| GO:0048534 | 442             | 290                | 27                | 1798              | 43                  | 8.36E-08 | 1.48E-04          | hemopoietic or lymphoid organ development |
| GO:0048518 | 2603            | 290                | 85                | 14777             | 281                 | 1.20E-07 | 1.48E-04          | positive regulation of biological process |
| GO:0005488 | 8814            | 290                | 203               | 14713             | 278                 | 2.71E-06 | 0.001971          | binding                                   |
| GO:0002682 | 531             | 290                | 30                | 6983              | 160                 | 2.78E-06 | 0.001971          | regulation of immune system process       |
| GO:0035556 | 1383            | 290                | 46                | 3586              | 70                  | 3.17E-06 | 0.001971          | intracellular signal transduction         |
| GO:0042101 | 6               | 290                | 4                 | 1296              | 32                  | 4.45E-06 | 0.002368          | T cell receptor complex                   |
| GO:0008152 | 7274            | 290                | 174               | 14777             | 281                 | 1.05E-05 | 0.004893          | metabolic process                         |
| GO:0048522 | 2358            | 290                | 77                | 10397             | 219                 | 1.50E-05 | 0.006193          | positive regulation of cellular process   |
| GO:0001816 | 299             | 290                | 16                | 4511              | 80                  | 5.15E-05 | 0.017027          | cytokine production                       |
| GO:0042824 | 5               | 290                | 3                 | 6619              | 121                 | 5.80E-05 | 0.017027          | MHC class I peptide loading complex       |
| GO:0046977 | 4               | 290                | 3                 | 4952              | 123                 | 5.88E-05 | 0.017027          | TAP binding                               |
| GO:0002691 | 4               | 290                | 3                 | 74                | 3                   | 6.17E-05 | 0.017027          | regulation of cellular extravasation      |
| GO:0001775 | 477             | 290                | 24                | 10364             | 218                 | 6.40E-05 | 0.017027          | cell activation                           |
| GO:0003824 | 4200            | 290                | 109               | 14713             | 278                 | 7.24E-05 | 0.017494          | catalytic activity                        |
| GO:0002520 | 465             | 290                | 27                | 2823              | 79                  | 7.52E-05 | 0.017494          | immune system development                 |
| GO:0044237 | 6187            | 290                | 156               | 11062             | 229                 | 9.25E-05 | 0.020263          | cellular metabolic process                |
| GO:0006955 | 509             | 290                | 26                | 5330              | 126                 | 1.09E-04 | 0.022475          | immune response                           |
| GO:0048519 | 2321            | 290                | 68                | 14777             | 281                 | 1.25E-04 | 0.02447           | negative regulation of biological process |
| GO:0008283 | 1092            | 290                | 38                | 14777             | 281                 | 2.10E-04 | 0.039183          | cell proliferation                        |
| GO:0071897 | 24              | 290                | 5                 | 2979              | 75                  | 2.59E-04 | 0.045869          | DNA biosynthetic process                  |

**C )mirDREM (miRanda, no anticorrelation constraints) Top 300 GO enrichment**

| <b>ID</b>  | <b>Pop.term</b> | <b>Study.total</b> | <b>Study.term</b> | <b>Pop.family</b> | <b>Study.family</b> | <b>p</b> | <b>p.adjusted</b> | <b>name</b>                       |
|------------|-----------------|--------------------|-------------------|-------------------|---------------------|----------|-------------------|-----------------------------------|
| GO:0007049 | 901             | 295                | 41                | 10374             | 203                 | 2.21E-07 | 7.16E-04          | cell cycle                        |
| GO:0042101 | 6               | 295                | 4                 | 1298              | 25                  | 1.57E-06 | 0.002539          | T cell receptor complex           |
| GO:0002376 | 1026            | 295                | 41                | 14799             | 282                 | 4.96E-06 | 0.004117          | immune system process             |
| GO:0035556 | 1385            | 295                | 42                | 3587              | 63                  | 5.09E-06 | 0.004117          | intracellular signal transduction |
| GO:0005488 | 8829            | 295                | 202               | 14734             | 280                 | 1.12E-05 | 0.007231          | binding                           |
| GO:0005634 | 4260            | 295                | 103               | 6929              | 133                 | 5.73E-05 | 0.030867          | nucleus                           |
| GO:0022402 | 632             | 295                | 27                | 10374             | 203                 | 1.01E-04 | 0.046795          | cell cycle process                |

## D) GenMIR++ Top 300 GO enrichment

| ID         | Pop.term | Study.total | Study.term | Pop.family | Study.family | p           | p.adjusted  | GOterm                                                                          |
|------------|----------|-------------|------------|------------|--------------|-------------|-------------|---------------------------------------------------------------------------------|
| GO:0032991 | 2809     | 296         | 118        | 15050      | 291          | 1.76E-18    | 5.42E-15    | macromolecular complex                                                          |
| GO:0044391 | 101      | 296         | 27         | 3497       | 123          | 9.84E-18    | 1.51E-14    | ribosomal subunit                                                               |
| GO:0043226 | 7731     | 296         | 218        | 15050      | 291          | 8.04E-17    | 8.24E-14    | organelle                                                                       |
| GO:0005840 | 161      | 296         | 30         | 5720       | 185          | 1.74E-15    | 1.34E-12    | ribosome                                                                        |
| GO:0044445 | 130      | 296         | 28         | 4426       | 163          | 6.60E-15    | 4.06E-12    | cytosolic part                                                                  |
| GO:0005198 | 349      | 296         | 33         | 14696      | 282          | 3.21E-14    | 1.65E-11    | structural molecule activity                                                    |
| GO:0044424 | 8879     | 296         | 238        | 12168      | 263          | 9.25E-13    | 4.07E-10    | intracellular part                                                              |
| GO:0044422 | 3446     | 296         | 120        | 15050      | 291          | 1.52E-12    | 5.86E-10    | organelle part                                                                  |
| GO:0005622 | 9074     | 296         | 239        | 12168      | 263          | 1.15E-11    | 3.84E-09    | intracellular                                                                   |
| GO:0015934 | 62       | 296         | 17         | 3376       | 119          | 1.25E-11    | 3.84E-09    | large ribosomal subunit                                                         |
| GO:0006412 | 319      | 296         | 30         | 4447       | 105          | 1.50E-11    | 4.20E-09    | translation                                                                     |
| GO:0030529 | 405      | 296         | 37         | 9119       | 240          | 2.16E-11    | 5.54E-09    | ribonucleoprotein complex                                                       |
| GO:0022626 | 65       | 296         | 25         | 226        | 33           | 1.39E-09    | 3.28E-07    | cytosolic ribosome                                                              |
| GO:0044444 | 4426     | 296         | 163        | 8879       | 238          | 2.83E-09    | 6.21E-07    | cytoplasmic part                                                                |
| GO:0005488 | 8807     | 296         | 212        | 14696      | 282          | 3.94E-08    | 8.08E-06    | binding                                                                         |
| GO:0008152 | 7270     | 296         | 176        | 14761      | 273          | 2.27E-07    | 4.37E-05    | metabolic process                                                               |
| GO:0015935 | 40       | 296         | 10         | 3376       | 119          | 7.04E-07    | 0.000127312 | small ribosomal subunit                                                         |
| GO:0015078 | 73       | 296         | 11         | 240        | 11           | 1.18E-06    | 0.00020129  | hydrogen ion transmembrane transporter activity                                 |
| GO:0005829 | 779      | 296         | 53         | 4426       | 163          | 1.85E-06    | 0.000300307 | cytosol                                                                         |
| GO:0003735 | 95       | 296         | 21         | 349        | 33           | 4.26E-06    | 0.000655857 | structural constituent of ribosome                                              |
| GO:0005623 | 12168    | 296         | 263        | 15050      | 291          | 5.21E-06    | 0.000728171 | cell                                                                            |
| GO:0044464 | 12168    | 296         | 263        | 15050      | 291          | 5.21E-06    | 0.000728171 | cell part                                                                       |
| GO:0005737 | 6785     | 296         | 208        | 8879       | 238          | 1.23E-05    | 0.001644619 | cytoplasm                                                                       |
| GO:0009987 | 10356    | 296         | 222        | 14761      | 273          | 1.54E-05    | 0.001816201 | cellular process                                                                |
| GO:0015985 | 11       | 296         | 4          | 433        | 8            | 1.52E-05    | 0.001816201 | energy coupled proton transport, down electrochemical gradient                  |
| GO:0019866 | 299      | 296         | 22         | 8885       | 238          | 1.59E-05    | 0.001816201 | organelle inner membrane                                                        |
| GO:0031975 | 568      | 296         | 29         | 12168      | 263          | 1.49E-05    | 0.001816201 | envelope                                                                        |
| GO:0015988 | 24       | 296         | 5          | 433        | 8            | 1.72E-05    | 0.001884063 | energy coupled proton transmembrane transport, against electrochemical gradient |
| GO:0030984 | 3        | 296         | 3          | 4948       | 134          | 1.94E-05    | 0.002061071 | kininogen binding                                                               |
| GO:0044455 | 91       | 296         | 9          | 5275       | 96           | 3.44E-05    | 0.003522955 | mitochondrial membrane part                                                     |
| GO:0003723 | 577      | 296         | 24         | 2108       | 43           | 6.66E-05    | 0.006418658 | RNA binding                                                                     |
| GO:0010608 | 244      | 296         | 13         | 2395       | 39           | 6.68E-05    | 0.006418658 | posttranscriptional regulation of gene expression                               |
| GO:0045261 | 4        | 296         | 3          | 8880       | 238          | 7.46E-05    | 0.006745327 | proton-transporting ATP synthase complex, catalytic core F(1)                   |
| GO:0071840 | 2853     | 296         | 79         | 14761      | 273          | 7.29E-05    | 0.006745327 | cellular component organization or biogenesis                                   |
| GO:0016469 | 36       | 296         | 6          | 6603       | 136          | 8.01E-05    | 0.007038849 | proton-transporting two-sector ATPase complex                                   |
| GO:0044446 | 3376     | 296         | 119        | 8885       | 238          | 8.86E-05    | 0.007572908 | intracellular organelle part                                                    |
| GO:0042599 | 9        | 296         | 4          | 196        | 8            | 0.000135914 | 0.011299239 | lamellar body                                                                   |
| GO:0033178 | 14       | 296         | 4          | 6603       | 136          | 0.000146829 | 0.01188539  | proton-transporting two-sector ATPase complex,catalytic domain                  |
| GO:0045259 | 13       | 296         | 4          | 8882       | 239          | 0.000301863 | 0.023808496 | proton-transporting ATP synthase complex                                        |
| GO:0000502 | 53       | 296         | 7          | 9102       | 240          | 0.00044482  | 0.034206662 | proteasome complex                                                              |
| GO:0015992 | 69       | 296         | 6          | 317        | 7            | 0.000516007 | 0.03779135  | proton transport                                                                |
| GO:0045182 | 20       | 296         | 4          | 14696      | 282          | 0.00050452  | 0.03779135  | translation regulator activity                                                  |
| GO:0043062 | 128      | 296         | 11         | 2101       | 58           | 0.000541976 | 0.038770225 | extracellular structure organization                                            |

**Dataset S3:** Complete listing of differentially expressed (DE) genes in three cohorts of patients with idiopathic pulmonary fibrosis, A) LGRC cohort, B) TissueBank cohort 1 and C) Tissuebank cohort 2

**A) miRNA expression values for the LGRC 142vs162 people cohort**

| <b>SystematicName</b> | <b>FOLD CHANGE</b> | <b>ttest p-value</b> |
|-----------------------|--------------------|----------------------|
| hsa-miR-205           | 7.1293913          | 3.03367E-23          |
| hsa-miR-449a          | 5.063085           | 2.30762E-13          |
| hsa-miR-31            | 3.8792008          | 1.44032E-19          |
| hsa-miR-337-5p        | 3.4510081          | 1.5128E-41           |
| hsa-miR-495           | 3.4108387          | 1.68486E-39          |
| hsa-miR-31*           | 3.3799198          | 1.35716E-19          |
| hsa-miR-34b           | 3.2577955          | 6.55629E-09          |
| hsa-miR-299-5p        | 3.2429486          | 1.73628E-33          |
| hsa-miR-34c-5p        | 3.1993989          | 3.14979E-11          |
| hsa-miR-493*          | 3.0667679          | 3.53444E-32          |
| hsa-miR-127-3p        | 2.991683           | 3.52059E-44          |
| hsa-miR-654-3p        | 2.9669627          | 3.0255E-38           |
| hsa-miR-377           | 2.8830756          | 1.67284E-48          |
| hsa-miR-136*          | 2.8524308          | 8.31101E-34          |
| hsa-miR-381           | 2.7837672          | 1.10934E-34          |
| hsa-miR-379           | 2.6951544          | 4.07553E-32          |
| hsa-miR-376b          | 2.6599215          | 2.93021E-34          |
| hsa-miR-154           | 2.5929967          | 5.40412E-34          |
| hsa-miR-409-3p        | 2.5905765          | 1.91018E-25          |
| hsa-miR-136           | 2.5810624          | 9.87048E-25          |
| hsa-miR-487b          | 2.5078384          | 2.29426E-40          |
| hsa-miR-376a          | 2.4349681          | 1.3788E-45           |
| hsa-miR-449b          | 2.3857437          | 1.9278E-09           |
| hsa-miR-34b*          | 2.3755193          | 3.36033E-13          |
| hsa-miR-376c          | 2.2076699          | 1.61639E-43          |
| hsa-miR-1             | 2.2032491          | 2.4432E-13           |
| hsa-miR-337-3p        | 2.0864897          | 5.67821E-20          |
| hsa-miR-199b-5p       | 2.0815698          | 2.47439E-35          |
| hsa-miR-21            | 2.0692109          | 4.20262E-34          |
| hsa-miR-382           | 2.0289625          | 4.41952E-26          |
| hsa-miR-410           | 1.9569834          | 1.03336E-19          |
| hsa-miR-432           | 1.9179516          | 9.32819E-21          |
| hsa-miR-34c-3p        | 1.8573862          | 2.53112E-05          |
| hsa-miR-650           | 1.8165299          | 7.49195E-14          |
| hsa-miR-133b          | 1.7952689          | 6.22525E-22          |
| hsa-miR-133a          | 1.7905775          | 9.02564E-16          |
| hsa-miR-154*          | 1.7392875          | 4.38612E-15          |
| hsa-miR-543           | 1.7092634          | 4.95084E-21          |
| hsa-miR-10b           | 1.7061094          | 2.53788E-10          |
| hsa-miR-129-3p        | 1.6908133          | 3.75643E-08          |
| hsa-miR-132           | 1.6885547          | 5.84421E-27          |
| hsa-miR-199a-3p       | 1.6684748          | 1.66439E-21          |
| hsa-miR-96            | 1.6403649          | 1.41672E-12          |
| hsa-miR-135b          | 1.6359355          | 9.28846E-14          |
| hsa-miR-214*          | 1.6102284          | 4.61216E-20          |
| hsa-miR-143*          | 1.572132           | 3.50266E-17          |
| hsa-miR-212           | 1.553826           | 1.72015E-10          |
| hsa-miR-369-5p        | 1.5507507          | 5.06864E-16          |

|                 |           |             |
|-----------------|-----------|-------------|
| hsa-miR-143     | 1.514577  | 9.34585E-18 |
| hsa-miR-155     | 1.5128667 | 4.20496E-15 |
| hsa-miR-148a    | 1.503827  | 4.11938E-20 |
| hsa-miR-214     | 1.4897093 | 1.80752E-28 |
| hsa-miR-411     | 1.4533674 | 6.05657E-12 |
| hsa-miR-34a     | 1.4258337 | 4.70346E-28 |
| hsa-miR-199a-5p | 1.4094814 | 2.84035E-28 |
| hsa-miR-376a*   | 1.3941856 | 4.60027E-12 |
| hsa-miR-183     | 1.3874263 | 9.96639E-06 |
| hsa-miR-99a     | 1.3839542 | 1.06142E-19 |
| hsa-miR-132*    | 1.3827385 | 1.20783E-06 |
| hsa-miR-202     | 1.372113  | 0.00865497  |
| hsa-miR-1202    | 1.3540615 | 0.001990204 |
| hsa-miR-625     | 1.3518518 | 4.18104E-05 |
| hsa-miR-125b-2* | 1.3514646 | 6.5516E-11  |
| hsa-miR-21*     | 1.3388391 | 2.67902E-05 |
| hsa-miR-152     | 1.3382827 | 1.34175E-16 |
| hsa-miR-125b    | 1.3368625 | 1.08498E-18 |
| hsa-miR-370     | 1.3366984 | 8.35486E-05 |
| hsa-miR-514     | 1.3308673 | 8.1776E-06  |
| hsa-miR-153     | 1.3175145 | 2.4905E-05  |
| hsa-miR-34a*    | 1.3129662 | 1.13546E-08 |
| hsa-let-7i      | 1.3117361 | 6.80895E-15 |
| hsa-miR-139-5p  | 1.3075617 | 4.10721E-11 |
| hsa-miR-622     | 1.304046  | 0.011525421 |
| hsa-miR-149     | 1.3021469 | 1.67992E-05 |
| hsa-miR-139-3p  | 1.3001388 | 5.2146E-09  |
| hsa-miR-455-3p  | 1.289302  | 4.10366E-09 |
| hsa-miR-27b     | 1.288598  | 4.69221E-22 |
| hsa-miR-940     | 1.2810493 | 1.8002E-05  |
| hsa-miR-371-5p  | 1.2783769 | 0.001875481 |
| hsa-miR-100     | 1.2777158 | 1.10458E-13 |
| hsa-miR-1224-5p | 1.2772603 | 4.04388E-05 |
| hsa-miR-939     | 1.2677454 | 0.000236899 |
| hsa-miR-145*    | 1.2676417 | 3.8035E-07  |
| hsa-miR-24-1*   | 1.2427535 | 3.12419E-06 |
| hsa-miR-99b*    | 1.2341861 | 0.003182587 |
| hsa-miR-95      | 1.2242964 | 0.010956617 |
| hsa-miR-766     | 1.2204206 | 0.000251062 |
| hsa-miR-424     | 1.2135281 | 0.000551793 |
| hsa-miR-23b     | 1.2093605 | 3.19321E-15 |
| hsa-miR-140-5p  | 1.2092616 | 1.93977E-08 |
| hsa-miR-582-5p  | 1.2068513 | 0.003026432 |
| hsa-miR-145     | 1.204814  | 1.1556E-05  |
| hsa-miR-892b    | 1.1992935 | 0.039169037 |
| hsa-miR-28-5p   | 1.1960007 | 1.72866E-06 |
| hsa-let-7e      | 1.195751  | 4.25002E-06 |
| hsa-miR-497     | 1.1956399 | 1.89363E-12 |
| hsa-miR-1280    | 1.1844743 | 0.000138749 |
| hsa-miR-188-5p  | 1.1776896 | 0.019655098 |
| hsa-miR-1305    | 1.1733126 | 0.005098589 |
| hsa-miR-1915    | 1.1694081 | 0.018581266 |

|                 |           |             |
|-----------------|-----------|-------------|
| hsa-miR-1185    | 1.1685723 | 3.09658E-06 |
| hsa-miR-22*     | 1.1676409 | 0.000127746 |
| hsa-miR-503     | 1.1659439 | 0.006997875 |
| hsa-miR-98      | 1.1644593 | 0.01270083  |
| hsa-miR-195     | 1.1626288 | 4.32787E-05 |
| hsa-miR-200b    | 1.1617645 | 0.017046687 |
| hsa-miR-299-3p  | 1.1602038 | 4.44674E-05 |
| hsa-miR-193b    | 1.1571845 | 1.2445E-06  |
| hsa-miR-27a     | 1.1565218 | 1.63155E-09 |
| hsa-miR-671-5p  | 1.1552645 | 0.048945031 |
| hsa-miR-1249    | 1.1532457 | 0.028846169 |
| hsa-miR-1914*   | 1.1525504 | 0.013950406 |
| hsa-miR-10a     | 1.1414432 | 0.022868263 |
| hsa-miR-365     | 1.1360416 | 9.41803E-05 |
| hsa-miR-142-3p  | 1.1300395 | 0.017788903 |
| hsa-miR-1274a   | 1.127781  | 0.001832686 |
| hsa-miR-505     | 1.1272374 | 0.000121163 |
| hsa-miR-539     | 1.1260617 | 2.93513E-05 |
| hsa-miR-23a     | 1.1170715 | 1.16186E-05 |
| hsa-miR-874     | 1.1153491 | 0.00209183  |
| hsa-miR-193a-3p | 1.1102523 | 0.019539611 |
| hsa-miR-324-5p  | 1.100439  | 3.59458E-06 |
| hsa-miR-22      | 1.0975774 | 0.001204535 |
| hsa-miR-148a*   | 1.0968906 | 5.15195E-05 |
| hsa-miR-585     | 1.0920892 | 0.002398933 |
| hsa-let-7i*     | 1.0885416 | 0.002013827 |
| hsa-miR-1274b   | 1.0794296 | 0.017577787 |
| hsa-miR-99a*    | 1.0721051 | 0.008376302 |
| hsa-miR-130b    | 1.0714096 | 0.02513359  |
| hsa-miR-758     | 1.0705192 | 0.00244983  |
| hsa-miR-24      | 1.0703608 | 9.09463E-07 |
| hsa-let-7c      | 1.0452351 | 0.048625865 |
| hsa-miR-361-5p  | 0.9518967 | 0.012734076 |
| hsa-miR-374b*   | 0.9476378 | 0.035507452 |
| hsa-miR-221     | 0.9365264 | 0.005395404 |
| hsa-miR-516b    | 0.9260915 | 0.011528498 |
| hsa-miR-664     | 0.9222753 | 0.00614909  |
| hsa-let-7d      | 0.9208279 | 0.045248898 |
| hsa-miR-425     | 0.9136974 | 0.000831698 |
| hsa-miR-624*    | 0.9096612 | 0.000503596 |
| hsa-let-7b      | 0.9095243 | 2.96935E-05 |
| hsa-miR-190     | 0.9094514 | 0.002271303 |
| hsa-miR-200c    | 0.9093892 | 0.023923695 |
| hsa-miR-99b     | 0.9072403 | 0.004073152 |
| hsa-miR-374b    | 0.9028216 | 0.00388473  |
| hsa-miR-29c*    | 0.9023212 | 6.35702E-07 |
| hsa-miR-193a-5p | 0.9014537 | 0.000397112 |
| hsa-miR-196b    | 0.8986968 | 0.022396399 |
| hsa-miR-93      | 0.8917991 | 3.48382E-06 |
| hsa-miR-320c    | 0.8913643 | 0.00482169  |
| hsa-miR-26b*    | 0.8909283 | 0.000116804 |
| hsa-let-7e*     | 0.8888603 | 9.79318E-05 |



|                 |           |             |
|-----------------|-----------|-------------|
| hsa-miR-15a*    | 0.8873145 | 0.000379271 |
| hsa-miR-25      | 0.8800027 | 1.9493E-07  |
| hsa-miR-29c     | 0.8772717 | 7.37996E-06 |
| hsa-miR-219-5p  | 0.874745  | 0.023032119 |
| hsa-miR-1469    | 0.8742756 | 0.001296515 |
| hsa-miR-29b-2*  | 0.8697126 | 6.6976E-07  |
| hsa-miR-221*    | 0.8696103 | 0.042484373 |
| hsa-miR-29a*    | 0.8683593 | 0.046310967 |
| hsa-miR-521     | 0.8675575 | 0.022149205 |
| hsa-miR-106b    | 0.8635181 | 2.77377E-06 |
| hsa-miR-526b    | 0.8602785 | 0.024283776 |
| hsa-miR-1307    | 0.8599451 | 0.002890067 |
| hsa-miR-28-3p   | 0.8585445 | 0.04450175  |
| hsa-miR-532-5p  | 0.8544851 | 4.51063E-11 |
| hsa-miR-542-5p  | 0.8529034 | 0.019485506 |
| hsa-miR-29b-1*  | 0.8515362 | 0.029907019 |
| hsa-miR-16      | 0.8502746 | 0.000103918 |
| hsa-miR-887     | 0.8492384 | 0.001758114 |
| hsa-miR-125b-1* | 0.8489163 | 0.00635047  |
| hsa-miR-186     | 0.8488241 | 2.53422E-10 |
| hsa-miR-361-3p  | 0.8482711 | 5.82521E-12 |
| hsa-miR-342-3p  | 0.8474601 | 1.59974E-06 |
| hsa-miR-30e*    | 0.8472762 | 1.34385E-08 |
| hsa-miR-30c     | 0.8457421 | 1.36543E-08 |
| hsa-miR-423-5p  | 0.8410276 | 4.73599E-09 |
| hsa-miR-151-3p  | 0.8406515 | 5.76452E-11 |
| hsa-miR-1229    | 0.84064   | 0.003289513 |
| hsa-miR-135a*   | 0.8373561 | 0.020997635 |
| hsa-miR-32      | 0.8357031 | 0.012059746 |
| hsa-miR-362-5p  | 0.835701  | 2.43384E-09 |
| hsa-miR-328     | 0.8355158 | 0.00909253  |
| hsa-miR-335*    | 0.8340746 | 0.000687108 |
| hsa-miR-19a     | 0.8332027 | 3.4388E-07  |
| hsa-miR-342-5p  | 0.8302539 | 6.72278E-07 |
| hsa-miR-130a    | 0.8299604 | 2.88071E-19 |
| hsa-miR-197     | 0.8287168 | 6.81185E-08 |
| hsa-miR-545     | 0.8271195 | 0.000221929 |
| hsa-miR-187*    | 0.8241239 | 0.034175429 |
| hsa-miR-192     | 0.8156308 | 0.002558232 |
| hsa-miR-636     | 0.812593  | 0.001852631 |
| hsa-miR-15b     | 0.8119784 | 4.86801E-09 |
| hsa-miR-378*    | 0.80546   | 0.003191856 |
| hsa-miR-26a     | 0.8042296 | 1.83598E-13 |
| hsa-miR-185     | 0.800098  | 5.10676E-10 |
| hsa-miR-15b*    | 0.8000871 | 5.9024E-08  |
| hsa-miR-339-3p  | 0.7960417 | 3.92393E-12 |
| hsa-miR-628-5p  | 0.7959242 | 0.000540715 |
| hsa-miR-499-5p  | 0.7949074 | 0.000306586 |
| hsa-miR-1182    | 0.7920752 | 0.019807636 |
| hsa-let-7a*     | 0.7901478 | 0.000353181 |
| hsa-miR-181b    | 0.7899964 | 2.35322E-12 |
| hsa-miR-548c-5p | 0.7844623 | 1.50892E-08 |

|                |           |             |
|----------------|-----------|-------------|
| hsa-miR-33b*   | 0.7835252 | 0.039562629 |
| hsa-miR-486-3p | 0.7833796 | 1.35539E-07 |
| hsa-miR-181d   | 0.7816962 | 2.88498E-09 |
| hsa-miR-522    | 0.7815942 | 3.88202E-05 |
| hsa-miR-592    | 0.7802308 | 8.69327E-07 |
| hsa-miR-532-3p | 0.7780998 | 1.76249E-13 |
| hsa-miR-20a    | 0.7758642 | 1.27881E-16 |
| hsa-miR-17     | 0.7746347 | 2.37419E-29 |
| hsa-miR-502-3p | 0.7742333 | 2.75023E-17 |
| hsa-miR-20b    | 0.7707543 | 8.93179E-13 |
| hsa-miR-215    | 0.7676281 | 0.000273248 |
| hsa-miR-877    | 0.7660874 | 0.003342239 |
| hsa-miR-498    | 0.7638078 | 0.007401953 |
| hsa-miR-19b    | 0.7636371 | 1.68139E-17 |
| hsa-miR-223    | 0.7631369 | 2.36048E-05 |
| hsa-miR-195*   | 0.7629457 | 9.46679E-05 |
| hsa-miR-210    | 0.7610377 | 2.94748E-12 |
| hsa-miR-501-5p | 0.7597712 | 2.05195E-05 |
| hsa-miR-335    | 0.7582564 | 1.15037E-06 |
| hsa-miR-501-3p | 0.7569253 | 2.62145E-09 |
| hsa-miR-101    | 0.7555731 | 3.67576E-14 |
| hsa-miR-218    | 0.7552044 | 3.75254E-07 |
| hsa-miR-18a    | 0.7501252 | 4.06532E-12 |
| hsa-miR-30c-1* | 0.7473582 | 5.33192E-09 |
| hsa-miR-502-5p | 0.7378654 | 2.16223E-06 |
| hsa-miR-363    | 0.7319263 | 4.11212E-06 |
| hsa-miR-629    | 0.7299718 | 4.82239E-09 |
| hsa-miR-17*    | 0.7287575 | 1.10692E-14 |
| hsa-miR-20a*   | 0.7280032 | 3.24573E-07 |
| hsa-miR-564    | 0.7263443 | 0.001703763 |
| hsa-miR-181c   | 0.722518  | 1.11045E-23 |
| hsa-miR-452    | 0.719016  | 3.48486E-16 |
| hsa-miR-627    | 0.7167879 | 1.65179E-09 |
| hsa-miR-33a    | 0.7157097 | 6.46233E-07 |
| hsa-miR-489    | 0.7089172 | 5.73686E-05 |
| hsa-miR-181a*  | 0.7017014 | 2.02296E-19 |
| hsa-miR-16-2*  | 0.6992187 | 1.29658E-10 |
| hsa-miR-373*   | 0.6938073 | 0.000115763 |
| hsa-miR-92a    | 0.6913641 | 9.45204E-19 |
| hsa-miR-181a   | 0.6861564 | 9.43902E-19 |
| hsa-miR-126*   | 0.6861172 | 1.40535E-08 |
| hsa-miR-423-3p | 0.683756  | 1.68808E-11 |
| hsa-miR-18b    | 0.6818564 | 2.73281E-15 |
| hsa-miR-224    | 0.6816851 | 3.85374E-09 |
| hsa-miR-222    | 0.6561428 | 1.50949E-10 |
| hsa-miR-144*   | 0.6512442 | 0.000609593 |
| hsa-miR-598    | 0.6449508 | 4.52573E-11 |
| hsa-miR-1471   | 0.6415042 | 0.001220774 |
| hsa-miR-652    | 0.6393687 | 5.22471E-29 |
| hsa-miR-194    | 0.6393363 | 5.65101E-14 |
| hsa-miR-19b-1* | 0.6390311 | 4.04396E-16 |
| hsa-miR-451    | 0.6320514 | 6.29646E-07 |

|                 |           |             |
|-----------------|-----------|-------------|
| hsa-miR-375     | 0.6123103 | 9.10051E-19 |
| hsa-miR-144     | 0.6082384 | 3.97627E-06 |
| hsa-miR-30a*    | 0.6042775 | 4.72072E-34 |
| hsa-miR-138     | 0.6012904 | 1.97526E-12 |
| hsa-miR-126     | 0.5916438 | 1.14976E-28 |
| hsa-miR-184     | 0.5889152 | 7.2218E-11  |
| hsa-miR-223*    | 0.5806467 | 1.76646E-12 |
| hsa-miR-516a-5p | 0.5771108 | 1.57982E-13 |
| hsa-miR-30a     | 0.574577  | 4.38051E-26 |
| hsa-miR-181c*   | 0.5701582 | 5.09358E-17 |
| hsa-miR-23a*    | 0.5570637 | 5.67421E-11 |
| hsa-let-7d*     | 0.5559762 | 1.26139E-10 |
| hsa-miR-30b     | 0.5538375 | 4.29781E-38 |
| hsa-miR-30c-2*  | 0.5389168 | 1.75793E-35 |
| hsa-miR-30b*    | 0.5354573 | 4.48087E-36 |
| hsa-miR-135a    | 0.507142  | 3.61425E-12 |
| hsa-miR-30d     | 0.4905563 | 3.16932E-30 |
| hsa-miR-486-5p  | 0.4839831 | 5.18292E-13 |
| hsa-miR-30d*    | 0.4759795 | 1.48149E-23 |
| hsa-miR-101*    | 0.4758409 | 1.86179E-27 |
| hsa-miR-203     | 0.4718639 | 2.80021E-27 |
| hsa-miR-326     | 0.4498431 | 9.22808E-43 |
| hsa-miR-517a    | 0.4041476 | 5.97017E-22 |
| hsa-miR-517c    | 0.3872092 | 4.44642E-22 |
| hsa-miR-338-3p  | 0.3624987 | 9.86897E-50 |

**B) miRNA expression classification for the tissuebank 10vs10 people cohort****SystematicName      Directionality of differential expression**

|                |      |
|----------------|------|
| hsa-miR-127    | up   |
| hsa-miR-132    | up   |
| hsa-miR-134    | up   |
| hsa-miR-155    | up   |
| hsa-miR-182    | up   |
| hsa-miR-198    | up   |
| hsa-miR-199a   | up   |
| hsa-miR-199b   | up   |
| hsa-miR-205    | up   |
| hsa-miR-214    | up   |
| hsa-miR-296    | up   |
| hsa-miR-299-5p | up   |
| hsa-miR-31     | up   |
| hsa-miR-320    | up   |
| hsa-miR-324-3p | up   |
| hsa-miR-330    | up   |
| hsa-miR-376a   | up   |
| hsa-miR-379    | up   |
| hsa-miR-409-3p | up   |
| hsa-miR-487b   | up   |
| hsa-miR-491    | up   |
| hsa-miR-509    | up   |
| hsa-miR-557    | up   |
| hsa-miR-622    | up   |
| hsa-miR-659    | up   |
| hsa-miR-765    | up   |
| hsa-miR-92b    | up   |
| hsa-miR-99a    | up   |
| let-7d         | down |
| miR-125a       | down |
| miR-126        | down |
| miR-138        | down |
| miR-17-3p      | down |
| miR-184        | down |
| miR-197        | down |
| miR-203        | down |
| miR-224        | down |
| miR-26a        | down |
| miR-30a-3p     | down |
| miR-30a-5p     | down |
| miR-30b        | down |
| miR-30c        | down |
| miR-30d        | down |
| miR-338        | down |
| miR-362        | down |
| miR-92         | down |

**C) miRNA expression values for the tissuebank 28vs33 people cohort**

| <b>systematic_name</b> | <b>ttest p-value</b> | <b>Fold change</b> |
|------------------------|----------------------|--------------------|
| ebv-miR-BART19-3p      | 0.03777896           | -3.174329          |
| hsa-let-7a*            | 0.025036234          | -1.92732           |
| hsa-let-7d*            | 1.29E-04             | -4.216877          |
| hsa-let-7i             | 2.75E-04             | 1.3513634          |
| hsa-miR-1              | 0.019660518          | 2.7677805          |
| hsa-miR-100*           | 0.029183453          | -1.094663          |
| hsa-miR-1208           | 0.044593595          | 1.9255959          |
| hsa-miR-1225-3p        | 0.005024546          | -1.695112          |
| hsa-miR-126            | 0.02290462           | -1.416787          |
| hsa-miR-127-3p         | 1.69E-05             | 2.7761967          |
| hsa-miR-129-3p         | 1.04E-04             | 5.1510506          |
| hsa-miR-1301           | 0.027926518          | -1.096552          |
| hsa-miR-132            | 0.01462466           | 1.7530699          |
| hsa-miR-133a           | 0.006380936          | 2.9537714          |
| hsa-miR-133b           | 0.001262683          | 2.4028838          |
| hsa-miR-136*           | 0.018198302          | 3.7110841          |
| hsa-miR-143            | 0.007679454          | 1.5495936          |
| hsa-miR-143*           | 0.034891646          | 2.6468115          |
| hsa-miR-146a           | 0.031571478          | -1.309501          |
| hsa-miR-146b-3p        | 0.049409695          | -1.081296          |
| hsa-miR-151-3p         | 0.007337354          | -1.176621          |
| hsa-miR-152            | 0.002781325          | 1.4117193          |
| hsa-miR-154            | 3.20E-05             | 6.2262874          |
| hsa-miR-154*           | 0.001082135          | 4.859066           |
| hsa-miR-181a           | 1.99E-05             | -1.600793          |
| hsa-miR-181a*          | 0.03140997           | -1.756231          |
| hsa-miR-181b           | 1.74E-05             | -1.476264          |
| hsa-miR-181c           | 6.10E-04             | -1.484477          |
| hsa-miR-181d           | 2.45E-06             | -1.76169           |
| hsa-miR-184            | 0.03402577           | -2.493711          |
| hsa-miR-197            | 0.021283349          | -1.349257          |
| hsa-miR-199a-3p        | 0.001225962          | 1.4606061          |
| hsa-miR-199a-5p        | 0.001356903          | 1.3339453          |
| hsa-miR-199b-5p        | 8.65E-04             | 1.8152604          |
| hsa-miR-19b-1*         | 0.009757555          | -1.945349          |
| hsa-miR-200c           | 0.006184558          | -1.573176          |
| hsa-miR-203            | 0.001642949          | -2.684027          |
| hsa-miR-205            | 0.007550371          | 7.288751           |
| hsa-miR-21             | 0.004311839          | 1.809233           |
| hsa-miR-210            | 0.004271977          | -1.453503          |
| hsa-miR-214            | 0.001519735          | 1.4578136          |
| hsa-miR-214*           | 0.03282364           | 2.2785082          |
| hsa-miR-222            | 4.16E-06             | -1.655521          |
| hsa-miR-23a*           | 0.019820033          | -2.501476          |
| hsa-miR-26a            | 0.010298942          | -1.150247          |
| hsa-miR-27a*           | 0.025607519          | -1.156813          |
| hsa-miR-27b            | 0.02778398           | 1.235184           |
| hsa-miR-28-5p          | 0.041933138          | 1.2193662          |
| hsa-miR-299-3p         | 0.003403887          | 2.2365103          |
| hsa-miR-299-5p         | 2.12E-08             | 12.780098          |

|                 |             |           |
|-----------------|-------------|-----------|
| hsa-miR-3065-5p | 0.029818505 | -3.163163 |
| hsa-miR-30a     | 0.007145941 | -1.57597  |
| hsa-miR-30a*    | 0.01517245  | -1.506528 |
| hsa-miR-30b     | 3.34E-04    | -1.719208 |
| hsa-miR-30b*    | 0.001300173 | -3.342941 |
| hsa-miR-30d     | 3.77E-08    | -2.142806 |
| hsa-miR-30d*    | 0.024397997 | -2.530247 |
| hsa-miR-31      | 1.89E-04    | 8.406341  |
| hsa-miR-31*     | 0.003537798 | 6.0338273 |
| hsa-miR-3149    | 0.026241792 | -1.101583 |
| hsa-miR-3181    | 0.025210774 | -1.206659 |
| hsa-miR-326     | 1.05E-05    | -4.371048 |
| hsa-miR-335*    | 0.037128173 | -2.769072 |
| hsa-miR-337-3p  | 4.90E-05    | 6.140157  |
| hsa-miR-337-5p  | 3.15E-04    | 7.0735908 |
| hsa-miR-338-3p  | 7.00E-04    | -3.121669 |
| hsa-miR-342-3p  | 3.78E-04    | -1.52217  |
| hsa-miR-342-5p  | 0.007822067 | -1.475012 |
| hsa-miR-34c-5p  | 0.036096606 | 3.7651496 |
| hsa-miR-361-3p  | 0.021804132 | -1.20989  |
| hsa-miR-361-5p  | 0.04504125  | -1.137092 |
| hsa-miR-369-5p  | 6.73E-05    | 3.9933183 |
| hsa-miR-371-5p  | 0.04749839  | 1.7236831 |
| hsa-miR-375     | 0.001718156 | -2.43139  |
| hsa-miR-376a    | 5.62E-04    | 3.0764985 |
| hsa-miR-376a*   | 0.003773363 | 2.3229918 |
| hsa-miR-376b    | 2.90E-05    | 6.594181  |
| hsa-miR-376c    | 0.01331366  | 2.595239  |
| hsa-miR-377     | 0.006348185 | 3.4775202 |
| hsa-miR-379     | 3.60E-06    | 8.445055  |
| hsa-miR-381     | 2.77E-04    | 5.9654484 |
| hsa-miR-382     | 1.09E-06    | 7.470548  |
| hsa-miR-409-3p  | 6.07E-10    | 21.914793 |
| hsa-miR-410     | 3.87E-07    | 8.62512   |
| hsa-miR-411     | 7.18E-05    | 4.496815  |
| hsa-miR-421     | 0.006857577 | 2.1466932 |
| hsa-miR-4291    | 0.012117385 | -1.249177 |
| hsa-miR-4313    | 0.041270826 | -1.713371 |
| hsa-miR-432     | 2.24E-06    | 7.1745667 |
| hsa-miR-4323    | 0.02434763  | -2.203146 |
| hsa-miR-449a    | 0.021987779 | 6.4758606 |
| hsa-miR-449b    | 0.015362001 | 4.142411  |
| hsa-miR-487b    | 2.87E-05    | 4.532046  |
| hsa-miR-489     | 5.08E-05    | -5.945296 |
| hsa-miR-493*    | 1.28E-10    | 18.513674 |
| hsa-miR-495     | 1.26E-05    | 7.244548  |
| hsa-miR-500a*   | 0.001440559 | -1.329574 |
| hsa-miR-501-5p  | 0.044711594 | -1.928709 |
| hsa-miR-502-3p  | 8.24E-04    | -1.364393 |
| hsa-miR-503     | 0.018005582 | 2.1399236 |
| hsa-miR-512-3p  | 0.034444507 | -1.089404 |
| hsa-miR-514     | 0.001964029 | 2.5378788 |

|                |             |           |
|----------------|-------------|-----------|
| hsa-miR-517b   | 0.03366402  | -1.134578 |
| hsa-miR-532-3p | 0.018577604 | -1.331933 |
| hsa-miR-539    | 0.006897023 | 1.8087255 |
| hsa-miR-543    | 6.54E-08    | 8.500724  |
| hsa-miR-548q   | 0.0488957   | -1.314496 |
| hsa-miR-583    | 0.028516129 | -1.096252 |
| hsa-miR-605    | 0.043752518 | 1.5499116 |
| hsa-miR-610    | 0.039703604 | 1.7031237 |
| hsa-miR-638    | 0.039814856 | -1.313573 |
| hsa-miR-642b   | 0.029872905 | 1.4115938 |
| hsa-miR-652    | 0.046206422 | -1.361586 |
| hsa-miR-654-3p | 1.05E-07    | 8.929594  |
| hsa-miR-664    | 0.024273891 | -1.194848 |
| hsa-miR-92a-1* | 0.034511182 | -1.089352 |
| hsv2-miR-H6    | 0.01793159  | -1.336587 |
